# 1 A human embryonic stem cell model of A $\beta$ -dependent 2 chronic progressive neurodegeneration

3  
4 Teresa Ubina<sup>1,4</sup>, Martha Magallanes<sup>1</sup>, Saumya Srivastava<sup>1</sup>., Charles Warden<sup>2</sup>, Jiing-Kuan Yee<sup>3,5</sup>,  
5 and Paul M. Salvaterra<sup>1,5</sup>

6 Department of Developmental and Stem Cell Biology<sup>1</sup>, Integrated Genomics Core<sup>2</sup>, and  
7 Department of Diabetes<sup>3</sup>, Beckman Research Institute of the City of Hope, 1500 E. Duarte Rd.,  
8 Duarte, CA, 91010, USA and the Irell and Manella Graduate School of Biological Sciences<sup>5</sup>,  
9 Beckman Research Institute of the City of Hope, 1500 E. Duarte Rd., Duarte, CA 91010, USA

10 Biology Department<sup>4</sup>, California State University San Bernardino, University Pkwy, San  
11 Bernardino, CA 92407, USA

12

13 Correspondence and contact information:

14 Paul M. Salvaterra, Ph.D.  
15 Department of Development and Stem Cell Biology  
16 Beckman Research Institute of the City of Hope  
17 1500 E. Duarte Rd.  
18 Duarte, CA 91010  
19 [psalv@coh.org](mailto:psalv@coh.org)  
20 626-301-8364  
21 <https://orcid.org/0000-0001-6797-680>

22

23

24 Author contributions:

25 Conceptualization, P.M.S.; Investigation, P.M.S., T.U., M.M., S.S., C.W.; Supervision, P.M.S.,  
26 J.Y.; Methodology, J.Y., S.S.; Writing-Original Draft P.M.S.; Writing-Review & Editing, P.M.S.,  
27 C.W., T.U., M.M., J.Y.; Formal Analysis, C.W.; Visualization, T.U., P.M.S.; Funding  
28 Acquisition, P.M.S.

29 Some of the work in this manuscript formed the basis of a Master of Science degree awarded to  
30 T. U. by the Biology Department, California State University San Bernardino.

## 31 Abstract

32 We describe construction and phenotypic analysis of a human embryonic stem cell model of  
33 progressive A $\beta$ -dependent neurodegeneration (ND) with potential relevance to Alzheimer's  
34 disease (AD). We modified one allele of the normal APP locus to directly express a secretory  
35 form of A $\beta$ 40 or A $\beta$ 42, eliminating the need for amyloidogenic APP proteolysis. Following  
36 neuronal differentiation edited cell lines specifically accumulate aggregated/oligomeric A $\beta$ ,  
37 exhibit a synaptic deficit and have an abnormal accumulation of endolysosomal vesicles. Edited  
38 cultures progress to a stage of overt ND. All phenotypes appear at earlier culture times for A $\beta$ 42  
39 relative to A $\beta$ 40. Whole transcriptome RNA-Seq analysis identified 23 up and 70 down  
40 regulated genes (DEGs) with similar directional fold change but larger absolute values in the  
41 A $\beta$ 42 samples suggesting common underlying pathogenic mechanisms. Pathway/annotation  
42 analysis suggested that down regulation of extracellular matrix and cilia functions are  
43 significantly overrepresented. This cellular model could be useful for uncovering mechanisms  
44 directly linking A $\beta$  to neuronal death and as a tool to screen for new therapeutic agents that slow  
45 or prevent human ND.

## 46 Introduction

47 Alzheimer's disease (AD) is a chronic progressive neurodegenerative disorder with a decade's  
48 long preclinical phase. Clinical features include memory loss accompanied by progressive  
49 cognitive dysfunction, cortical atrophy and ultimately death. Neuropathology is well defined by  
50 a widespread accumulation of two prominent lesions in cortical brain regions: amyloid plaques  
51 and neurofibrillary tangles. Plaques are composed primarily of higher-ordered aggregates of  
52 small A $\beta$  peptides derived from amyloidogenic proteolysis of a large transmembrane amyloid  
53 precursor protein (APP). Tangles are composed largely of hyperphosphorylated aggregates of a  
54 microtubule stabilizing protein tau, a product of the MAPT gene. All forms of AD exhibit  
55 accumulation of both A $\beta$  plaques and neurofibrillary tangles and both are considered necessary  
56 for a definitive postmortem diagnosis [1]. Both plaque and tangle neuropathology correlate with  
57 decrements in cognitive function in AD, but our mechanistic understanding of how these lesions  
58 contribute to progressive neurodegeneration (ND) is still incomplete [2]. The reasons for this  
59 include the inherent complexity of the disease as well as inadequacies of current animal and  
60 cellular experimental models.

61 There are two general forms of AD: a rare autosomal dominant familial form (FAD) and the  
62 more prevalent sporadic form (SAD). Both FAD and SAD have a complex genetic component  
63 (i.e. >20 identified risk alleles with APOE4 being the most prominent), significant life-style  
64 associations (obesity, sleep, exercise, etc.), several associated co-morbidities (i.e. diabetes, head  
65 trauma), and of course the most important correlate of all, old age. This complexity coupled with  
66 the lengthy time course of the disease process and the relative inaccessibility of patient samples  
67 makes it challenging to develop effective therapies. Most clinical trials of AD therapeutics have  
68 failed at an unprecedented rate [3]. Part of this dismal status quo is likely due to our poor  
69 understanding of basic pathobiology of AD. Preclinical testing of AD drugs is typically done  
70 using transgenic mice, but these AD models are deficient in at least two important ways. They

71 fail to exhibit progressive neurodegeneration (ND) and do not generally display neurofibrillary  
72 tangle pathology [4].

73 Transgenic rodent AD models (see for example: <https://www.alzforum.org/research->  
74 [models/alzheimers-disease](https://www.alzforum.org/research-models/alzheimers-disease)) usually rely on over-expression of one or more FAD mutant genes.  
75 They generally exhibit cognitive phenotypes, synaptic deficits, and accumulation of aggregated  
76 A $\beta$  through amyloidogenic proteolysis but not progressive ND or tau related pathology  
77 suggesting their use as preclinical models is not practical [5]. Progressive ND and tau related  
78 pathology are also not generally observed in aged non-human primate models [6]. Considerable  
79 effort has gone into developing mouse models with tau AD-like tau pathology driven in large  
80 part by notable differences in human and mouse tau isoforms differences in tau [7] or  
81 incorporating a mutant tau MAPT gene [8]. MAPT mutations, however, not associated with AD  
82 can cause other types of non-AD ND disease [9]. Generation of “second generation” knock-  
83 out/knock-in rodent models, designed in part to eliminate over-expression artifacts common with  
84 high level transgene expression and humanizing the APP sequence also lack progressive ND or  
85 tangle pathology but have been useful in highlighting interpretive phenotypic complexity of  
86 “first generation” models [4].

87 A few distinctive AD models have been developed which exhibit progressive A $\beta$ -dependent ND  
88 using direct over-expression of secretory A $\beta$  coding transgenes. This approach eliminates the  
89 need for amyloidogenic proteolysis of APP to generate A $\beta$ . These types of models have been  
90 well characterized in invertebrate organisms such as *Drosophila* [10] and less extensively in  
91 mice [11–14]. Direct A $\beta$  over-expression in rodent or *Drosophila* neurons does not significantly  
92 affect normal brain development but results in an impressive range of putative AD-like  
93 phenotypes including accumulation of aggregated/oligomeric A $\beta$ 42, neurological and memory  
94 deficits, early and massive autophagy/endosomal/lysosomal abnormalities, mitochondria  
95 dysfunction and plaque like accumulations of A $\beta$  [11,13–17]. None of these models exhibits tau  
96 pathology and they all suggest that phenotypes are exclusive to A $\beta$ 42 overexpression since an  
97 equivalent amount of A $\beta$ 40 does not result in similar changes. Direct expression of A $\beta$  may thus  
98 be an effective way to study the now uncharacterized cascade of A $\beta$ -dependent mechanistic  
99 changes which are thought to precede ND as postulated in the dominant amyloid cascade  
100 hypothesis [18]. While this hypothesis is strongly supported by a wealth of supporting evidence  
101 [19], it remains “controversial” because of seemingly discordant observations made in  
102 phenotypically deficient animal models or more importantly correlative clinical discrepancies in  
103 AD patients [20]. The most serious discrepancy often cited is the relative timing of amyloid and  
104 tangle pathology with respect to cognitive status of patients, however, recent longitudinal  
105 imaging studies have generated a better time line for pathogenic progression in patients and  
106 convincingly place A $\beta$  at the beginning, at least in FAD patients [21].

107 Explanations for phenotypic deficiencies in current AD models are often attributed to the  
108 relatively short lifespan of rodents or human species-specific factors. These human differences  
109 are either known (i.e. isoform differences in tau or A $\beta$  sequence, etc.) or unknown, but possibly  
110 related to the complex genetic context of both FAD and SAD and thus not possible to adequately  
111 model in non-human animals. With the advent of reprogramming technology, AD patient derived

112 iPS culture models have been established which now allow phenotypic characterization in a  
113 human genetic context [22]. Pioneering studies document a number of promising AD-relevant  
114 phenotypes using cells derived from with FAD patients including increased amyloidogenic A $\beta$   
115 production/aggregation, increased ratios of A $\beta$ 42/A $\beta$ 40, or lysosomal/endosomal dysfunction  
116 [23,24]. The AD-relevant phenotypic repertoire has even been extended to include tau related  
117 pathology when FAD genes are overexpressed in human neural precursor cells or FAD iPS cells  
118 are differentiated in a 3-D culture format [25,26]. The authors suggest that the AD relevant tau  
119 phenotypic extension could be due to the more complex “brain-like” cellular organization of 3-D  
120 cultures and/or decreased removal of extracellular A $\beta$  during normal culture media replacement  
121 [27]. Progressive ND, however, was not among the phenotypes of these 3-D cultures. Current  
122 human iPS models while encouraging are still not suitable to investigate mechanisms linking A $\beta$   
123 to progressive ND.

124 Here, we describe the construction and initial AD-like phenotypic characterization of a new  
125 human embryonic stem cell model A $\beta$ -dependent ND. We used genomic editing to modify  
126 parental WiCell WA09 cells (H9) to directly express a secretory form of either A $\beta$ 40 or A $\beta$ 42  
127 from one allele of the normal APP gene locus. Expression is thus under control of the normal  
128 APP promoter, but amyloidogenic processing is not necessary for A $\beta$  production. Following  
129 neuronal differentiation, edited neurons accumulate intracellular aggregated/oligomeric A $\beta$  but  
130 the rate is faster for A $\beta$ 42 edited lines. Aggregated/oligomeric A $\beta$  preferentially localizes near  
131 fragmented/pyknotic nuclei, even in unedited cells which presumably produce a small amount  
132 through amyloidogenic processing. A $\beta$ 42 edited cells elaborate several other AD-relevant  
133 phenotypes at a faster rate than A $\beta$ 40 lines including synaptic deficits and a greater accumulation  
134 of endolysosomal vesicles. Importantly, both edited genotypes exhibit progressive ND relative to  
135 unedited control cells and the rate of progression is faster for A $\beta$ 42 cultures. Whole  
136 transcriptome RNA-Seq analysis identified a small set of differentially expressed genes (DEGs)  
137 in the A $\beta$ 42 samples compared to unedited samples which had a similar directional fold-change  
138 in A $\beta$ 40 samples but a smaller magnitude. This suggests that common genetic pathways may be  
139 affected since mRNA was isolated at a time when phenotypic changes were more extensive or  
140 exclusive to A $\beta$ 42 samples. Functional annotation and pathway analysis of DEGs identified  
141 “increased neuronal cell death” and “decreased memory” as the highest and lowest scoring  
142 functions perturbed in A $\beta$ 42 edited cells and suggested that disruption of extracellular matrix and  
143 cilia play a prominent role.

## 144 Methods

### 145 Genomic Editing

146 TALEN (Transcription activator-like effector nuclease) pairs were designed to target DNA  
147 upstream of the normal APP translation start site using published criteria, their cutting efficiency  
148 established in HEK293T cells and used to generate a double strand break in the APP target [28].  
149 Donor templates for homology repair contained homology arms flanking the targeted site along  
150 with a secretory signal derived from the rat proenkephalin (PENK) gene, a human A $\beta$ 40 or A $\beta$ 42

151 coding sequence, and a polyA tail. Donor templates also contained a puromycin selection gene  
152 under control of the human phosphoglycerate kinase.

153 H9 (WiCell WA09) human embryonic stem cells were obtained from the WiCell Foundation and  
154 cultured on a feeder free system (Matrigel). Cells were harvested at appropriate confluency and  
155 nucleofected with TALEN pairs and donor template using an Amaxa Nucleofector. Nucleofected  
156 cells were grown for 48 hours, harvested and plated on puromycin resistant feeder cells at a  
157 dilution of 1/30 for 48 hours and then transferred to puromycin drug selection media for two  
158 weeks. Approximately ½ of appropriate size colonies were collected for PCR analysis using  
159 primer pairs that spanned the flanking DNA and the donor plasmid sequences to confirm  
160 insertion of the expression cassette. The stem cell colonies positive for correct size PCR  
161 fragments at both the 3' and 5' sites were expanded and analyzed for expression of edit specific  
162 Aβ40 or Aβ42 expression using qRT-PCR analysis. The forward primer was specific to the rat  
163 secretory signal sequence (not present in the human genome) and the reverse primer targets the  
164 end of the Aβ40 sequence. The specific sequences and editing and verification details are  
165 included in the **Supplemental Methods and Data**.

#### 166 Cell culture

167 ESC culture, embryoid body generation and neuronal differentiation were adapted from a well-  
168 established protocol [29]. Briefly, stem cells were grown in gelatin coated six-well plates on an  
169 irradiated mouse embryonic fibroblasts feeder layer. Stem cells were maintained in HuES  
170 medium which was replaced daily and differentiating colonies were manually removed to  
171 maintain pluripotency. Stem cells were passaged weekly and differentiation was initiated ~1  
172 week after passage using dissociated cells transferred to a 10 cm culture plate for embryoid body  
173 (EB) generation. On day 3 cells were grown in Neural Induction Media (NIM) with N2  
174 supplement and 2 µg/ml heparin. On day 5 media was supplemented with ascorbic acid, trans-  
175 retinoic acid, Y-27632 ROCK inhibitor, and BDNF. On day 7 smoothed agonist 1.3 was  
176 added. Media was replaced every 3<sup>rd</sup> day and after ~28-31 days EBs were collected, rinsed with  
177 Ca<sup>2+</sup>/Mg<sup>2+</sup> free PBS, dissociated into individual cells and plated in either 6 or 24 well culture  
178 plates precoated with poly-L-ornithine and laminin (1.7x10<sup>6</sup> or 0.34x10<sup>6</sup> cells per well) in neural  
179 differentiation medium supplemented with 25 µM β-mercaptoethanol and 25 µM glutamate.  
180 Cultures were initially treated with 0.5 µM ethynyl deoxyuridine (EdU) for 24 hrs and weekly  
181 thereafter up to ~50 days to maintain only post mitotic cells. Complete media recipes, suppliers  
182 and protocol details are included in the **Supplemental Methods and Data**.

#### 183 qRT-PCR

184 Total RNA was extracted using the RNeasy Micro Kit from (Qiagen) following the  
185 manufacturer's protocol. RNA concentration and purity was determined spectrophotometrically  
186 and cDNA prepared using qScript cDNA SuperMix (Quanta) following the manufacturers  
187 protocol. All reactions were carried out in a 20 µl reaction mixture containing 12.5 µl iQTM  
188 SYBR® Green Supermix (Bio-Rad), 2 µM of each forward and reverse primer, 0.25 µg cDNA,  
189 and DEPC-Treated Water (Ambion) to adjust the final volume to 20µL. Amplification was  
190 carried out using a BioRad CFX96 Touch™ Real-Time PCR machine in clear 96 well sealed

191 plates and data was collected and analyzed using BioRad CFX Manager (v3.1). Additional  
192 details and primer sequences are included in the **Supplemental Methods and Data**.

### 193 [Microscopy, Immunocytochemistry, Live-Dead Analysis and Image Analysis](#)

194 Fluorescence samples were observed with a Zeiss Axio Observer microscope (Xenon  
195 illumination) using either a 20X NA=0.80 plan-apochromat objective or a 40x or 63x plan-  
196 apochromat objective (NA=1.4, Oil). Optical Z sections were acquired with a Zeiss Axiocam506  
197 camera using Zeiss Zen Blue microscope control software (SP2). Unstained cultures were  
198 observed using a Nikon Diaphot inverted microscope equipped with Hoffman modulation  
199 contrast objectives (HMC EF 10X NA=0.25 or HMC 20X LWD NA=0.4) and images were  
200 obtained with a SPOT RT230 cooled CCD camera operated by SPOT Advanced Imaging  
201 Software. Image analysis used semi or fully automated macros implemented in the FIJI version  
202 of NIH ImageJ (v1.46 or 2) [30]. For visual clarity some images are adjusted for brightness and  
203 contrast using Adobe Photoshop (CS4 or CS5). Due to variability in the number of cells in  
204 neuronal clusters both among genotypes differentiated in parallel, as well as across independent  
205 differentiations, quantitative data were usually normalized to the number or area of DAPI  
206 staining.

### 207 [Antibody staining](#)

208 Cells were grown on polyornithine/laminin coated 15mm No.1 glass coverslips (Fisher  
209 Scientific) placed in 6 well plates. Cells were fixed with 4% paraformaldehyde for 20 minutes  
210 followed by washing in PBS (3x, 5 min.) and coverslips were stored in 0.03% NaN<sub>3</sub> in PBS at  
211 4°C until observation. Coverslips were incubated with blocking buffer (0.3% Triton X-100 and  
212 5% Bovine Serum Albumin in PBS) for ~2 hr. at room temperature, washed briefly with PBS  
213 and incubated overnight at 4°C with primary antibody diluted in 0.3% Triton X-100, 1% bovine  
214 serum albumin in PBS (antibody dilution buffer). Coverslips were washed with PBS (3x5 min.)  
215 with antibody dilution buffer and incubated with fluorescent labeled secondary antibodies for  
216 two hours at room temperature, washed with PBS, incubated with DAPI (1µg/µl) for 5 minutes  
217 at room temperature, washed with PBS (2x, 5 min.) and mounted onto glass slides using DAKO  
218 Fluorescent Mounting Medium. Additional coverslips were stained after eliminating either the  
219 primary or secondary antibody to serve as negative staining controls. Specific antibody staining  
220 details and image analysis parameters are included in the **Supplemental Methods and Data**.

### 221 [Live-Dead Analysis](#)

222 Neuronal viability was estimated by measuring the relative proportion of live/dead cells in  
223 neuronal clusters grown on coverslips or directly in culture wells using a commercial  
224 fluorescence assay (ThermoFisher LIVE/DEAD™ Viability/Cytotoxicity Kit, for mammalian  
225 cells, #L322) according to the manufacturer's directions. Additional details and image analysis  
226 parameters are included in the **Supplemental Methods and Data**.

### 227 [Statistical Analysis](#)

228 We used Prism (v7, Graph Pad) for statistical analyses (descriptive statistics, ANOVA, variance  
229 estimates and correlation) and graphic preparation.

## 230 RNA-Seq

231 Stem cells were differentiated for 36 or 38-days and total RNA was extracted using the RNeasy  
232 Micro Kit (Qiagen) following the manufacturer's protocol. RNA concentration and purity were  
233 determined using a NanoDrop ND-1000 spectrophotometer and processed for RNA-Seq analysis  
234 by the City of Hope Genomic Core Facility. Detailed processing and analysis protocols are  
235 included in the **Supplemental Methods and Data**. The sequencing data files have been  
236 deposited in the NIH GEO database (GSE119527).

## 237 Results

### 238 Model construction

239 We used TALEN genomic editing to modify the normal wild-type APP gene in WiCell WA09  
240 (H9) human embryonic stem cells (hES). This cell line was chosen because of its widespread  
241 use in stem cell studies, the availability of many well characterized neuronal differentiation  
242 protocols and because the APOE genotype contains one copy of an  $\epsilon 4$  allele which is the major  
243 genetic risk factor for SAD [31]. The APOE genotype ( $\epsilon 4/\epsilon 3$ ) was confirmed using allele  
244 specific PCR analysis (not shown). The editing strategy is shown schematically in Fig. 1.  
245 TALEN pairs were designed to induce a double strand break (DSB) within the first exon of the  
246 *App* locus upstream of the normal *App* transcriptional start site. The DSB was repaired by  
247 homologous recombination in the presence of donor plasmids that contained a secretory signal  
248 sequence derived from the rat preproenkephalin gene (PENK, *Rattus norvegicus*) fused in frame  
249 to either a human A $\beta$ 40 or A $\beta$ 42 coding sequence and followed by a polyA tail just upstream of  
250 a puromycin drug selection gene. This insertion cassette was flanked by left and right homology  
251 arms to direct insertion into the normal *App* locus.

252 **[Fig. 1. Genomic editing of APP gene locus.** TALEN pairs were designed to target and induce a  
253 double strand break (DSB) in the first exon upstream of the normal APP translation initiation  
254 codon (APP ATG). The DSB was repaired by homologous recombination in the presence of  
255 plasmids containing the coding sequence for either A $\beta$ 40 or A $\beta$ 42 fused in frame with a rat  
256 preproenkephalin secretory signal sequence (SS) and followed by a polyA tail (not shown).  
257 Repair plasmids additionally included a PGK puromycin drug selection gene (Puro) and were  
258 flanked by left and right homology arms homologous to APP flanking sequences (HAL, HAR).  
259 Cassette insertions were confirmed by genomic PCR using specific primers in either the HAL (5')  
260 or the HAR (3') and a site in the insertion cassette. This editing strategy simultaneously  
261 inactivates one APP allele and replaces it with a cassette that directly expresses a secretory  
262 form of either A $\beta$ 40 or A $\beta$ 42 under normal APP regulatory control. The specific sequences and  
263 other details are included in the **Supplemental Methods and Data**.]

264 Successful editing resulted in inactivation of the modified *App* allele and its replacement with  
265 direct expression of either secretory A $\beta$ 40 or A $\beta$ 42. Importantly, the parental and edited cell  
266 lines are essentially isogenic ensuring that phenotypic differences are directly attributable to the  
267 specific edits. The rat PENK secretory signal sequence is not present in the human genome  
268 allowing PCR analysis to specifically detect edited A $\beta$  transcripts. Following translation, the  
269 signal peptide is completely removed by normal secretory pathway processing resulting in direct

270 production of either an A $\beta$ 40 or A $\beta$ 42 peptide [11,15] eliminating any requirement for  
271 amyloidogenic APP processing by  $\beta$  and  $\gamma$  secretase. Since the edits are introduced directly into  
272 the normal APP locus, expression will be under control of the normal APP regulatory DNA. This  
273 distinguishes our model from others that generally used exogenous promoters to drive  
274 overexpression. We hypothesized that this model could potentially speed up proteotoxic A $\beta$   
275 accumulation on a time scale suitable for working with cultured human neurons while potentially  
276 minimizing overexpression artifacts.

277 Proper editing was initially identified by PCR screening of multiple subclones using 3' and 5'  
278 specific primers and confirmed by genomic sequencing. Since subcloning as well as TALEN  
279 editing has the potential to generate off-target effects (primarily indels) or other mutations,  
280 although at extremely low levels [32], we phenotypically characterized two independently  
281 isolated subclones for each edited genotype in parallel. We noted no consistent phenotypic  
282 differences between subclones suggesting that the differences we describe are genotype specific  
283 (i.e. due to direct expression of either A $\beta$ 40 or A $\beta$ 42). All edited cell lines used in this study  
284 were heterozygous for the edit ensuring that normal APP will still be expressed from the  
285 unedited allele.

#### 286 A $\beta$ and APP expression

287 We used qRT-PCR to measure edit specific expression of secretory A $\beta$  using a forward primer  
288 specific to the rat PENK secretory signal peptide which is absent from the human genome and a  
289 reverse primer to the end of the A $\beta$ 40 sequence which is present in both edits. As expected, no  
290 edit specific transcripts were detected in unedited H9 cells (Fig. 2A). Significant levels were  
291 found in undifferentiated stem cells, EB stage cells or differentiated neurons. The relative  
292 expression levels were similar for both edited genotypes at these three developmental stages  
293 indicating that they are under the same regulatory control. We additionally confirmed that only  
294 secretory A $\beta$ 42 expression could be detected in A $\beta$ 42 edited lines using a reverse primer specific  
295 to the unique 5' nucleotides in A $\beta$ 42 (not shown). Undifferentiated stem cells show an  
296 intermediate expression level, consistent with normal APP expression previously reported at this  
297 stage [33]. Transcript abundance decreased significantly during EB formation and increased to  
298 the highest levels in 10-day old neuronally differentiated cultures. The relative ratio of edit  
299 specific A $\beta$  mRNA for stem cells, embryoid bodies and differentiated neurons was ~20:1:100.  
300 We expect that A $\beta$  protein levels would likely be highest in differentiated neurons (i.e. ~5-fold  
301 greater than in stem cells).

302 **[Fig. 2. (A) Direct expression levels of edit specific A $\beta$  are similar for both edited genotypes**  
303 **and dynamic during early stages of differentiation.** Stem cell cultures have intermediate  
304 expression, embryoid bodies have significantly less expression and differentiated neurons have  
305 the highest, reaching maximal expression by ~10-20 days after EB dissociation and plating in  
306 neural differentiation medium. The relative ratios of A $\beta$  expression were ~1: 0.05: 5 for the 3  
307 developmental stages. There were no significant differences in expression level comparing edit  
308 specific A $\beta$ 40 and A $\beta$ 42 at any stage (ANOVA, Dunnett's correction). No significant secretory A $\beta$   
309 expression was detected in unedited H9 samples. Data were from 6 independent stem cell



310 cultures, 4 EB stage cultures and 22 individual 10-20 day old differentiated neuronal cultures.  
311 **(B) Editing does not affect APP expression from unedited alleles.** We used primer pairs  
312 spanning 3 different APP exons. The pattern of expression was similar for all 3 genotypes and  
313 average relative expression for the primer pairs was 1: 0.71: 0.5 for H9: A $\beta$ 40: A $\beta$ 42 and is  
314 consistent with expected inactivation of one APP due to editing. Expression of edit specific A $\beta$   
315 was ~30-fold less than APP expression and is replotted from (A) for comparison. Data were  
316 from 4 independent differentiations of H9 cells and 8-20 differentiations for edited genotypes  
317 taken from 10-34-day old cultures. In (A) expression was measured by qRT-PCR using a forward  
318 primer specific to the secretory signal sequence (not present in the human genome) and  
319 reverse primer to a sequence common to A $\beta$ 40 and A $\beta$ 42. In (B) the forward and reverse  
320 primers spanned indicated exons in the APP sequence. Bars are mean normalized expression  
321 (MNE) relative to GAPDH ( $\pm$ STD).]

322 We additionally measured APP expression in 10-day old differentiated neurons using forward  
323 and reverse primers that span different adjacent exons along the length of the normal neuronal  
324 APP transcript (Fig. 2B). Different exon spanning primer pairs detected APP transcripts over an  
325 approximately ~8-fold range, but the pattern was similar for all 3 genotypes. The average  
326 relative APP expression for all 3 primer pairs compared to H9 was 0.71 for A $\beta$ 40 and 0.5 for  
327 A $\beta$ 42 a result is consistent with expected inactivation of only the edited APP allele. This  
328 confirms that editing does drastically affect APP expression from the unedited allele.  
329 Unexpectedly, however, direct A $\beta$  expression was ~30-fold lower relative to APP expression  
330 (the A $\beta$  data is replotted from Fig. 2A). This could be due to weakening of a regulatory element  
331 in the first intron of APP [34] or alternatively to negative interference of the drug selection gene  
332 present in the insertion cassette [35]. Whatever the reason, direct expression levels for edit  
333 specific A $\beta$  are significantly lower than APP.

334 Unfortunately, we were unable to reliably measure A $\beta$  protein levels in either  
335 immunoprecipitated culture supernatants (10 ml of immunoprecipitated sample pooled from 5  
336 samples every 2 days from a single well of a 12 well culture plate), or in guanidine hydrochloride  
337 or formic acid cell extracts (prepared from 2 individual 12 well cultures) using commercial  
338 ELISA assay kits (Invitrogen, A $\beta$ 40 #KHB3481, sensitivity 6 pg/ml; A $\beta$ 42 #KHB3441,  
339 sensitivity = 10 pg/ml). These negative results are consistent with our qRT-PCR analysis and  
340 suggest that A $\beta$  peptide levels in our cultures are significantly lower than those generated by  
341 amyloidogenic APP processing in differentiated neuronal culture models derived from human  
342 FAD iPS cells or cells transduced with FAD genes [25,36,37].

### 343 [Early development and culture differentiation](#)

344 AD is a chronic and progressive neurodegenerative disease that only appears later in life. We  
345 observed no consistent genotype specific differences in morphology of ES stage culture,  
346 embryoid body (EB) formation or the earliest stages of culture in neuronal differentiation  
347 medium (see **Supplemental Methods and Data, Fig. S1**). Additionally, earlier stage embryoid  
348 bodies (7 day old) lose their initial positive staining for OCT4 (stem cell marker) and acquire  
349 Nestin staining (early neural differentiation marker) at a similar time independent of editing (see

350 Supplemental Fig. S1). The appearance of differentiation markers in 10-day old cultures is  
351 shown in Fig. 3. The total cell number (DAPI), DCX positive cells (doublecortin, early stage  
352 neuronal differentiation) and NeuN positive cells were not significantly different among the tree  
353 genotypes (ANOVA, Dunnett correction). We conclude that genomic editing and APP  
354 heterozygosity do not appear to affect neurogenesis or early neural development in our cultures  
355 and that the majority of cells (60-70%) can be classified as neurons after 10 days. Hereafter all  
356 culture ages for differentiated cells are specified relative to EB dissociation and plating taken as  
357 day 0.

358 **[Fig. 3. Editing does not significantly affect early stage neuronal differentiation. (Left)**  
359 Representative images of 10-day old cultures stained with antibodies to DCX (doublecortin,  
360 green) to visualize early stage neuronal differentiation, NeuN (red) to visualize more mature  
361 neurons and DAPI (blue) to assess total cell number. **(Right)** Quantification of positively stained  
362 cells for each marker indicate that there were no genotype specific differences (ANOVA,  
363 Dunnett's correction). Bars are the mean (SEM) of 3 biological replicates. Scale bar = 30  $\mu\text{m}$ .]

364 Consistent with the neuronal marker data the morphological appearance of all three genotypes, as  
365 well as the independent edited clones, remains quite similar up to about 30-days of culture (Fig.  
366 4). One day old cultures have only isolated cells, a few of which appear to exhibit short  
367 processes. By  $\sim 15$  days, cells appear to self-organize into loosely defined neural clusters (NC)  
368 and elaborate neural processes, some connecting to adjacent clusters. The size of the NCs  
369 increases slightly between 20 and 30 days and begins to appear more 3-D dimensional. Many  
370 NCs are connected to each other by neural processes at this stage. The size of NCs in both edited  
371 genotypes often appeared slightly larger compared to H9 cultures, but this was not statistically  
372 significant (ANOVA, Dunnett corrected) and absent by 40 days.

373 **[Fig. 4. Representative Hoffman interference contrast images of unedited H9 parental cells**  
374 **and two independently isolated clones for each edited genotype (A $\beta$ 40:#31, #41 and**  
375 **A $\beta$ 42:#14, #26) at different culture ages.** Isolated cells in 1-day cultures begin to cluster  
376 together a few days after plating. By  $\sim 10$ -15 days of differentiation all 3 genotypes form more  
377 recognizable neuronal clusters (NC) which are attached to the culture surface and elaborate  
378 neural processes which connect with adjacent NCs. Morphologic appearance of all 3 genotypes  
379 was generally similar up to  $\sim 30$ -40 days of culture. The absolute size of NCs varied across  
380 independent differentiations, however, there were no significant differences among the 3  
381 genotypes up to  $\sim 30$  days of age (ANOVA, Dunnett correction). After  $\sim 20$ -30 days, A $\beta$ 42  
382 genotypes begin to exhibit a granular and darker appearance (especially evident in the A $\beta$ 42  
383 clone #26 30 day image) and the somal regions are no longer firmly attached to the culture  
384 surface but tethered by their neuronal processes. After 50-60 days, essentially all A $\beta$ 42  
385 genotypes exhibit this type of morphology as do many of the A $\beta$ 40 cultures at culture times  
386 greater than  $\sim 70$ -90 days. We did not observe any consistent clone specific differences for  
387 edited genotypes. Scale bars = 10  $\mu\text{m}$  for 1-day culture and 100  $\mu\text{m}$  for other ages.]

388

389 At culture times of 40-50 days, A $\beta$ 42 NCs usually had a more granular appearance and were  
390 darker than the other genotypes. In one case we also observed this morphologic change as early  
391 as 30 day (see Fig. 4, A $\beta$ 42 clone #26). This morphologic appearance was more prominent in  
392 A $\beta$ 42 NCs older than 60 days and thus appears to specific to the A $\beta$ 42 edited cells. The  
393 neuronal soma for both edited genotypes lost firm attachment after ~60-70 days but still  
394 remained loosely tethered to the culture dish through their neural processes. This could be easily  
395 observed when gently moving the culture dish and was never seen in the unedited H9 cultures.  
396 Notably, we were not able to culture viable cells for either edited genotype for any time longer  
397 than 120 days. In contrast, unedited H9 cultures could be maintained for >266 days. Editing thus  
398 decreases the survival time of neurons and results in specific morphologic changes, especially  
399 apparent for A $\beta$ 42 edits. The absolute size of NCs had considerable variation in independent  
400 differentiations but this was a property of all 3 genotypes. These morphologic descriptions were  
401 generalized from observations made by 3 different investigators on 15 independent  
402 differentiations over a period of >2 years using several different lots of media and supplements.

#### 403 Alzheimer's related phenotypes

##### 404 Accumulation of aggregated/oligomeric A $\beta$ and pyknotic nuclei

405 The main objectives of this study were to document putative AD-related phenotypes resulting  
406 from direct A $\beta$  expression in human neurons and to compare the extent of phenotypic differences  
407 between A $\beta$ 40 and A $\beta$ 42. The most commonly observed AD-related phenotypes present in most  
408 animal models as well as several iPS culture models is the accumulation of aggregated A $\beta$   
409 produced by amyloidogenic APP proteolysis (see [4,22] for reviews).

410 We double stained cultures with an anti-A $\beta$  antibody (7A1a) which specifically recognizes low  
411 and high molecular weight aggregates/oligomers of A $\beta$ 40 or A $\beta$ 42 [17,38] and anti-Tuj1  
412 (TUBB3 gene product) to confirm neuronal cellular identity. In 32 day old cultures the level of  
413 7A1a positive staining is genotype specific (Fig. 5A). The relative area of 7A1a staining  
414 (normalized to Tuj1) was minimal in H9, intermediate in A $\beta$ 40 and significantly higher in A $\beta$ 42  
415 cultures. Compared to unedited H9 cultures, the area of 7A1a staining was ~2 fold higher in  
416 A $\beta$ 40 cultures (but not statistically different from H9) and ~3 fold higher in A $\beta$ 42 cultures  
417 ( $p < 0.0016$ ) at 32 days (Fig. 5B). At a later culture age (63 d) the average accumulation of 7A1a  
418 positive staining relative to H9 increased to ~3 fold in A $\beta$ 40 and ~4.5 fold in A $\beta$ 42 cultures.  
419 Accumulation of aggregated/oligomeric A $\beta$  is thus progressive and faster for A $\beta$ 42 relative to  
420 A $\beta$ 40 cultures. This result is consistent with the biophysical aggregation properties of these 2  
421 peptides *in vitro* [39] and since both edited genes are expressed at comparable levels suggests  
422 that A $\beta$ 42 may be removed at a slower rate. Both edited genotypes have less Tuj1 positive  
423 staining which was especially evident in older cultures but not in older H9 cultures (5A).

424 **[Fig. 5. Accumulation of aggregated/oligomeric A $\beta$  is time dependent and more prominent in**  
425 **A $\beta$ 42 relative to A $\beta$ 40 edited cultures and is associated with pyknotic nuclei, even in unedited**  
426 **H9 samples. (A)** Maximum intensity Z-projections of NCs fluorescently stained with anti-Tuj1  
427 (neuronal, green) and anti-A $\beta$  7A1a (aggregated/oligomeric A $\beta$ , red) antibodies in 32 or 63 day  
428 old cultures. Consistently, the area of 7A1a positive staining is greater in A $\beta$ 42 NCs,

429 intermediate in A $\beta$ 40 NCs and much lower in unedited H9 cultures. Staining is primarily  
430 intracellular and initially appears as small puncta which are more obvious in areas of lower  
431 staining intensity. **(B)** Box and whisker plot of relative 7A1a staining in individual NCs  
432 (normalized to Tuj1 staining). The line in the box is the median value, whiskers are the range.  
433 Data is from 4 independent differentiations. NCs from A $\beta$ 42 cultures have significantly greater  
434 accumulation of aggregated/oligomeric A $\beta$  at 32-days (ANOVA, Dunnett correction) relative to  
435 H9. Accumulation in A $\beta$ 40 cultures appears higher than H9 but are not significant at this age.  
436 Mean relative accumulation of 7A1a staining  $\pm$ SEM were: H9 =  $1 \pm 0.235$ , A $\beta$ 40 =  $3.77 \pm 0.704$ ,  
437 A $\beta$ 42 =  $6.93 \pm 1.63$ . In 63-day old cultures, both A $\beta$ 40 and A $\beta$ 42 are significantly different  
438 relative to H9. The mean relative areas are: H9 =  $1 \pm 0.157$ , A $\beta$ 40 =  $2.34 \pm 0.287$ , A $\beta$ 42 =  
439  $3.959 \pm 0.337$ . **(C)** 7A1a staining is present primarily in areas near pyknotic/fragmented DAPI  
440 stained nuclei (i.e. small intensely fluorescent structures, arrowheads) and absent from cells  
441 with normal nuclei (i.e. large, weak DAPI fluorescence, arrows). Images are from a single optical  
442 section of a 32-day old A $\beta$ 42 sample (top row) with a magnified view (bottom row) of the  
443 indicated rectangular area. **(D)** Association of 7A1a and pyknotic nuclei is not dependent on  
444 editing. **(Left)**, images of fragmented or intact nuclei from A $\beta$ 42 or H9 cultures. **(Right)**, spatial  
445 distribution of 7A1a fluorescence relative to the center of mass for DAPI staining. Bars are the  
446 mean (SEM) area of 7A1a staining in individual concentric circles centered on the DAPI staining.  
447 Data is from at least 60 nuclei or pyknotic nuclei from 3 independent differentiations of 32/34  
448 day old cultures. Scale bar in **A** = 10  $\mu$ m, **C** = 20  $\mu$ m, **D** = 4  $\mu$ m.]

449 7A1a staining was primarily intracellular and appeared to be in close proximity to pyknotic  
450 nuclei characteristic of dead or dying cells (i.e. nuclear condensation and fragmentation).  
451 Normal neuronal nuclei are large and only weakly stained with DAPI while pyknotic bodies are  
452 smaller and have intense DAPI fluorescence. Fig. 5C shows this spatial relationship in a 32-day  
453 old A $\beta$ 42 culture. Larger areas of 7A1a staining were generally absent in areas near normal  
454 nuclei but common near pyknotic nuclei. Whenever 7A1a staining was occasionally present  
455 close to normal nuclei the staining area was small and punctate (possibly vesicular).

456 We also noticed that the few cells in unedited H9 cultures with 7A1a positive staining also  
457 seemed to be near pyknotic nuclei (Fig. 5D, left panel). We tested this spatial relationship by  
458 placing a counting grid of concentric circles (radius increased in 2  $\mu$ m increments) over the  
459 center of mass for normal pyknotic bodies in H9 and A $\beta$ 42 cultures. The area of 7A1a staining  
460 in each ring relative to the distance from the center of mass is plotted as a histogram in Fig. 5D  
461 (right panel). Pyknotic nuclei have more 7A1a staining nearby relative to normal intact nuclei.  
462 Surprisingly, this relationship is quite similar for both A $\beta$ 42 edited and unedited H9 cultures.  
463 This suggests that pyknosis may be caused by aggregated/oligomeric A $\beta$ 42 derived from either  
464 direct expression or through APP amyloidogenic processing.

#### 465 Synaptic density

466 A decrement in the number of synapses is a consistent and early AD phenotype that correlates  
467 well with cognitive decline, even during preclinical disease stages [40]. Several transgenic

468 mouse models exhibit synaptic deficits, but we are unaware of this phenotype being described in  
469 human cell culture models. We stained 34-day old cultures with anti-synapsin 1 antibody (a  
470 presynaptic marker) to estimate the number of synapses present in neuronal clusters from the  
471 different genotypes. As shown in Fig. 6, all 3 genotypes at this culture stage have a significant  
472 number of synapsin positive puncta. There are, however, ~50% fewer synapsin positive puncta in  
473 A $\beta$ 42 edited samples ( $p < 0.0147$ ) relative to unedited H9 samples. A $\beta$ 40 samples had ~20%  
474 fewer synapsin puncta, but did not reach significance. There is thus a graded genotype  
475 dependent difference in the number of synapsin puncta at this culture stage: H9 > A $\beta$ 40 >> A $\beta$ 42.  
476 We did not distinguish if the A $\beta$ 42 synaptic deficiency was due to decreased synaptogenesis or  
477 increased synaptic loss. Our results establish that synaptic number is reduced to a greater extent  
478 in A $\beta$ 42 compared to A $\beta$ 40 cultures a result that is consistent with the concept that A $\beta$   
479 negatively affects synaptic capacity [40].

480 **[Fig. 6. A $\beta$ 42 edited NCs have fewer synapsin1 stained puncta in 34-day old cultures.** Images  
481 are maximum intensity projections of 3 adjacent 0.05  $\mu$ m spaced optical sections stained with  
482 anti-synapsin1 (synaptic marker, green) and anti-NeuN (mature neurons, red) antibodies and  
483 DAPI (total cells, blue). Synapsin1 positive puncta were counted in individual NCs from 3  
484 different differentiations normalized DAPI and analyzed (ANOVA, Dunnett corrected). The  
485 number of synapsin1 puncta was significantly less for A $\beta$ 42 cultures. The relative number of  
486 puncta  $\pm$ SEM were: H9 =  $1 \pm 0.198$ , A $\beta$ 40 =  $0.618 \pm 0.065$ , A $\beta$ 42 =  $0.492 \pm 0.081$ . Data was from 3  
487 independent differentiations. Scale bar = 20  $\mu$ m.]

#### 488 Progressive ND

489 AD is a chronic progressive disease with end stage neuronal cell death, a phenotype that has  
490 been particularly difficult to document in most current experimental models. We used a  
491 fluorescent live/dead assay to assess neuronal viability at 3 different culture ages. Representative  
492 morphological and fluorescent images of the same field are shown in Fig. 7 (top). Despite a  
493 normal morphologic appearance and similar numbers of neurons in 10-day old cultures, we  
494 found a slightly higher proportion of ethidium homodimer fluorescence (dead cells) in A $\beta$ 42  
495 cultures even at this early culture stage (Fig. 7, bottom). At an intermediate culture age (34-39  
496 days) when A $\beta$ 42 neuronal clusters have significantly fewer synapsin puncta, the relative  
497 ethidium homodimer fluorescence was greater in A $\beta$ 42 compared to either A $\beta$ 40 or H9 cultures.  
498 When maintained for longer times (i.e. > ~60 days) both A $\beta$ 40 and A $\beta$ 42 edited cultures exhibit  
499 significantly more relative ethidium homodimer fluorescence compared to unedited H9 cultures.  
500 Since most cells under our culture conditions are neurons (~70-90% Tuj1 positive), we conclude  
501 that editing results in progressive ND. This phenotype appears at a faster rate for A $\beta$ 42 cells  
502 relative to A $\beta$ 40 cells and is dependent on editing. No viable cells remained in edited culture  
503 older than 120 days while H9 cultures still appeared healthy even after 266 days. This edit  
504 specific progressive ND also appears to be chronic because of the extended time necessary for its  
505 elaboration.

506 **[Fig. 7. A $\beta$ 42 and A $\beta$ 40 edited cultures undergo progressive ND. (Top)** Hoffman extended  
507 depth-of-field images (left) with a corresponding fluorescent maximum intensity projection

508 (right) at 3 different culture ages. Green fluorescence (calcein-AM) and red fluorescence  
509 (ethidium homodimer) was used to estimate live or dead cells. **(Bottom)** Quantitation of  
510 relative ratio of dead/live cells. Relative to unedited H9 cultures there are significantly more  
511 dead neurons in A $\beta$ 42 samples at all three culture ages (ANOVA, Dunnett corrected). A $\beta$ 40  
512 samples have significantly more dead neurons but only in cultures older than 60 days. Mean  
513 values ( $\pm$ SEM) for 10-day old samples were: H9 =  $1.173 \pm 0.289$ , A $\beta$ 40 =  $3.4 \pm 0.643$ , A $\beta$ 42 =  
514  $4.49 \pm 1.471$ ; for 34-39-day old samples: H9 =  $23.9 \pm 3.226$ , A $\beta$ 40 =  $20.79 \pm 2.025$ , A $\beta$ 42 =  
515  $35.00 \pm 2.974$  and for >60-day old samples: H9 =  $16.02 \pm 1.612$ , A $\beta$ 40 =  $32.36 \pm 3.016$ , A $\beta$ 42 =  
516  $38.46 \pm 1.588$ . Each data point represents an individual NC collected from a total of 8 individual  
517 differentiations. The line inside the box is the median and the whiskers are the range. Scale bar  
518 = 100  $\mu$ m.]

### 519 Endolysosomal pathway phenotypes

520 Dysfunction of the endolysosomal pathway, plays an important role in several neurodegenerative  
521 diseases, including AD [41]. Pathway dysfunction is a consistent feature of several animal and  
522 cellular AD models [23,42] as well as an early phenotype in AD [43] and can be inferred by  
523 accumulation of an abnormal number or size of characteristic vesicles.

524 Using vesicle type specific antibody staining we counted the relative number of punctate  
525 vesicular structures in neurons. Fig. 8 presents representative images and analysis for 38 and 62-  
526 day old cultures stained with anti-lysosomal associated membrane protein 1 (LAMP1) antibody.  
527 There was a ~2-fold increase in LAMP1 positive puncta in 38-day old A $\beta$ 42 cultures relative to  
528 either A $\beta$ 40 or unedited H9 cultures. This finding agrees with the reduced neuronal viability in  
529 A $\beta$ 42 samples and synapsin1 puncta at this culture stage. In older cultures (62 days) the number  
530 of Lamp1 puncta relative to unedited H9 cells was decreased ~60% in A $\beta$ 42 and ~50% in A $\beta$ 40  
531 samples (although not significant). This decrease thus correlates with ND present in both edited  
532 genotypes in older cultures. Abnormal accumulation of lysosomal related vesicles may thus be a  
533 consequence of direct A $\beta$  expression in human neurons.

534 **[Fig. 8. The number of LAMP1 positive vesicles is affected by editing.** (Left), fluorescence  
535 maximum intensity projections of 2 adjacent optical sections stained with anti-LAMP1 antibody  
536 (green) or DAPI (blue) at 2 different culture times. (Right) The relative number of LAMP1  
537 positive puncta (normalized to DAPI) in individual NCs was greater in 38 day old A $\beta$ 42 samples  
538 relative to H9. In 62 day cultures both A $\beta$ 42 and A $\beta$ 40 (not significant) samples have fewer  
539 LAMP1 objects relative to H9 (ANOVA, Dunnett corrected). Data are from 3 independent  
540 differentiations of 38 day cultures and 2 independent differentiations of 62 day cultures. Mean  
541 values ( $\pm$ SEM) for 38 day samples were: H9 =  $1 \pm 0.139$ , A $\beta$ 40 =  $0.84 \pm 0.059$ , A $\beta$ 42 =  $2.064 \pm 0.142$   
542 and for 62 day samples H9 =  $1 \pm 0.205$ , A $\beta$ 40 =  $0.553 \pm 0.106$ , A $\beta$ 42 =  $0.453 \pm 0.101$ . The line inside  
543 the box is the median and the whiskers are the range. Scale bar = 10  $\mu$ m.]

544 The number of Rab5 stained puncta, a marker for early endosomes necessary for vesicular  
545 maturation leading to lysosomal fusion [44] is shown in Fig. 9A. The pattern is similar to  
546 LAMP1 puncta. There was a significant increase in Rab5 puncta in 38-42 day old A $\beta$ 42 relative

547 to H9 samples and a non-significant increase in A $\beta$ 40 samples. Both edited genotypes also  
548 showed a significant decrease in Rab5 puncta in older 63-day cultures. Fig. 9B additionally  
549 shows puncta counts for Rab3A, a synaptic vesicular gene important for regulating normal  
550 synaptic neurotransmission [45] and LC3B, an autophagosome vesicle marker necessary for  
551 delivering mature autophagic/endosomal vesicles to lysosomes for cargo digestion which has  
552 been associated with AD [46]. The number of Rab3A puncta were not significantly different  
553 among any of the genotypes in 43-day old cultures but both genotypes exhibit a reduction in 63  
554 day old cultures. Both A $\beta$ 40 and A $\beta$ 42 samples had a reduction in LC3B puncta in 43 day old  
555 cultures (only A $\beta$ 40 was significant) as well as in 63 day cultures.

556 **[Fig. 9. The number of other endolysosomal vesicles is affected by editing.** Rab5 positive  
557 objects in NCs is greater in 38-42 day old A $\beta$ 42 samples. At a later culture age (62 days) both  
558 A $\beta$ 40 and A $\beta$ 42 samples have fewer LAMP1 objects. **A. (Left)**, maximum intensity projections of  
559 2 adjacent optical sections (1  $\mu$ m spacing) stained with anti-Rab5 antibody (early endosome  
560 marker, red) and DAPI (blue). **(Right)** The relative number of Rab5 puncta (normalized to DAPI)  
561 is greater in 38-42 day cultures for A $\beta$ 42 edited samples and less for both A $\beta$ 42 and A $\beta$ 40 edited  
562 samples in 63 day cultures (ANOVA, Dunnett corrected). Data is from individual NCs from 3  
563 independent differentiations for 38-42 day cultures and 2 independent differentiations for 63  
564 day cultures. Mean values ( $\pm$ SEM) for 38-42 day samples are: H9 =  $1 \pm 0.1448$ , A $\beta$ 40 =  
565  $2.39 \pm 0.2767$ , A $\beta$ 42 =  $4.80 \pm 1.333$  and for 63 day samples are: H9 =  $1 \pm 0.1584$ , A $\beta$ 40 =  
566  $0.586 \pm 0.071$ , A $\beta$ 42 =  $0.4198 \pm 0.0341$ . **B.** The relative number of Rab3A and LC3B puncta were  
567 more variable but both decreased primarily in older cultures. Individual NCs from 2  
568 independent differentiations were stained with either anti-Rab3A (synaptic vesicle associated  
569 marker) or LC3B (autophagosome marker) antibody. There was a decrease in LC3B objects in  
570 A $\beta$ 40 samples at 43 days and a decrease in both A $\beta$ 40 and A $\beta$ 42, as well as LC3B puncta, in 63  
571 day cultures (ANOVA, Dunnett corrected). Bars are mean  $\pm$ SEM, N=5-20). Scale bar = 20  $\mu$ m.]

572 Taken together these results indicate that endolysosomal pathway dysfunction is associated with  
573 A $\beta$  edited samples and that A $\beta$ 42 samples appear to be affected at earlier times and to a greater  
574 extent than A $\beta$ 40 samples. These changes are not likely due to changes in gene expression for  
575 key vesicular genes since qRT-PCR analysis did not find any genotype specific changes in gene  
576 expression (see Supplemental Fig. S2). Since we are directly expressing A $\beta$  in edited cultures,  
577 these potential AD related phenotypes are also likely to be largely independent of APP  
578 amyloidogenic processing which occurs in large part within endolysosomal vesicles [47].

#### 579 Somal accumulation of phospho-tau

580 Accumulation of hyperphosphorylated tau (p-tau) and formation of paired helical filaments is a  
581 pathological hallmark of late stage AD [7]. We examined the immunocytochemical staining of  
582 62 day old cultures with an antibody specific for tau phosphorylation on serine 244, known to be  
583 increased by A $\beta$  [48]. Image analysis of the total area of p-tau staining (normalized to DAPI)  
584 was not significantly different between A $\beta$ 42 and H9 cultures. The cellular distribution of the  
585 staining, while consistent with a redistribution of p-tau from neural processes to cell soma (Fig.

586 10, top) was only observed in late stage A $\beta$ 42 cultures already exhibiting significant ND. The  
587 apparent “redistribution” may thus be due to an accompanying decrease in neural processes of  
588 dead or dying neurons. The level of tau expression (MAPT gene product) measured by RNA-Seq  
589 analysis was relatively similar among the genotypes in earlier age cultures (Fig. 10, bottom).  
590 Increased hyperphosphorylation and redistribution of tau which has previously been observed in  
591 iPS AD cell models [25,26] but does not appear to be a significant phenotype of direct A $\beta$   
592 expression.

593 **[Fig. 10. Older A $\beta$ 42 cultures show apparent distribution of phospho-tau in cell soma**  
594 **compared to H9 cultures where it is localized in neurites. (Top)** Fluorescence images from 3  
595 representative fields for each genotype taken from a 62 day old culture stained with anti-  
596 phospho-tau antibody (green) and DAPI (blue). This apparent difference is likely due to a  
597 significant decrease in neurites on dead or dying cells present in A $\beta$ 42 cultures rather than a  
598 redistribution of signal. The area of phospho-tau staining (normalized to DAPI) was not  
599 significantly different between H9 and A $\beta$ 42 samples ( $p=0.9078$ ,  $N>15$ , t test). Scale bar = 20  
600  $\mu\text{m}$ . **(Bottom)**, RNA-Seq analysis indicates no significant difference in relative MAPT expression  
601 (coding for tau) among the genotypes (ANOVA, Dunnett corrected). Data points are from  
602 independent RNA-Seq samples ( $\pm\text{SEM}$ ).]

### 603 A $\beta$ -dependent differential gene expression

604 The edited cell lines present a particularly favorable opportunity for whole transcriptome RNA-  
605 Seq analysis to identify differentially expressed genes (DEGs) that may be mechanistically  
606 linked to A $\beta$ -dependent ND. They are not confounded by uncontrolled amyloidogenic APP  
607 proteolysis, overexpression of non-A $\beta$  fragments and are near isogenic. We performed RNA-  
608 Seq expression using mRNA isolated from 36-38-day old cultures. This is a stage where  
609 phenotypes are either exclusive (i.e. reduced number of synapses, reduced neuronal viability and  
610 increased accumulation of lysosomes and endosomes) or more penetrant (greater accumulation  
611 of aggregated A $\beta$ ) for the A $\beta$ 42 editing compared to A $\beta$ 40 editing. RNA isolated from 3  
612 independent H9 culture samples served as the reference control to identify DEGs for each edited  
613 genotype. All three genotypes are heterozygous for the major sporadic AD risk allele (i.e.  $\epsilon 4/\epsilon 3$ )  
614 and thus in an appropriate human genetic context relevant to a large proportion of SAD cases  
615 [49].

616 We tested differential expression for 18,259 genes (i.e. genes that had an FPKM  $> 0.1$  in 50% of  
617 samples). Results of hierarchical clustering along with an expression heat-map for the batch  
618 centered sample medians of individual samples are shown in Fig. 11A. The 4 A $\beta$ 42 samples  
619 cluster together on the same branch of the dendrogram. One A $\beta$ 40 sample (#31.1) clusters  
620 adjacent to the A $\beta$ 42 group while the other (#41.1) appears more like unedited H9 samples  
621 indicating that whole transcriptome expression is more similar among individual A $\beta$ 42 edited  
622 samples relative to either A $\beta$ 40 or unedited H9 samples which agrees with phenotypic  
623 penetrance at this culture age. DEGs may thus be mechanistically associated with A $\beta$ 42-  
624 dependent affected pathways related to these phenotypes.



625 We defined DEGs by first identifying genes that vary between A $\beta$ 42 vs H9 and then filtering  
626 genes with a similar directional change for A $\beta$ 40 that using a more liberal criteria (to avoid  
627 keeping genes marginally not significant in the A $\beta$ 40 vs H9 comparison) (see **Supplemental**  
628 **Methods and Data** for full details). All 93 DEGs for the A $\beta$ 42 vs H9 comparison are shown in  
629 Fig. 11B as a fold change (FC) heat map. There were 23 UP and 70 DN (down) regulated genes  
630 which were used for functional/annotation enrichment analysis. This number is rather small  
631 compared to numerous other AD related studies of DEGs in patient samples or even iPS cell  
632 lines where thousands of DEGs are often identified [23,50–52]. Note that the directional FC  
633 (fold-change) was similar for most genes in the A $\beta$ 40 samples compared to A $\beta$ 42. The Pearson  
634 correlation coefficients for log<sub>2</sub> ratios of all A $\beta$ 42 vs H9 compared to A $\beta$ 40 vs H9 genes was  
635 0.5434 (all genes, linear-regression p-value < 0.0001, Fig. 11C, top), and the correlation  
636 coefficient for the DEG FC values is 0.3183 (differentially expressed genes, linear regression p-  
637 value = 0.0019, Fig.11C, bottom). A $\beta$  dependent changes in gene expression thus appear similar  
638 for A $\beta$ 42 and A $\beta$ 40 samples. A complete list of all detected genes, the genotype specific  
639 average log<sub>2</sub> RPKM values, log<sub>2</sub> ratios of the H9 DEG comparisons, FC values, statistics and  
640 DEG status is included as **Supplemental Table S1**.

641 **[Fig. 11. Differentially expressed genes in 34-day old cultures. A.** Cluster analysis of  
642 differentially expressed genes (Pearson dissimilarity metric). A $\beta$ 42 samples cluster together  
643 while A $\beta$ 40 and H9 samples overlap. **B.** Heat map of significant DEGs from RNA-Seq analysis of  
644 A $\beta$ 42 vs H9 comparison and A $\beta$ 40 vs H9 comparison. Up (UP) regulated genes (red) and down  
645 (DN) regulated genes (green) were sorted by the magnitude of the indicated fold change (FC)  
646 values for the A $\beta$ 42 vs H9 comparison. There is a general correspondence in the directional FC  
647 values with a relatively larger FC in the A $\beta$ 42 samples. **C.** Pearson correlation confirms  
648 significant co-variation of the log<sub>2</sub> ratios of all genes (top, significant DEGs in color) as well as  
649 the FC values for significant UP and DN regulated genes (bottom).]

650 GO enrichment analysis of the UP and DN regulated genes for the A $\beta$ 42 vs H9 comparison did  
651 not identify functional enrichment for UP genes after correcting for FDR. The statistical power  
652 of this approach, however, is likely limited when using a small number (23) of input DEGs. For  
653 DN genes, however, 13 out of 70 (19%) were related to cilia functions and were significantly  
654 overrepresented (i.e. FDR<0.05) (CCDC114, CFAP100, CFAP126, CFAP45, CFAP70, DAW1,  
655 DNAAF1, DNAH11, DNAI2, SPAG17, STOML3, TEK1, USH2A). Interestingly, 5 of these  
656 “cilia” genes (DAW1 DNAH11 DNAI2 GDA TEK1) were also differentially expressed in a  
657 hippocampal AD vs non-AD RNA-Seq study [50] suggesting that cilia related pathways may  
658 also be affected in AD. Using unadjusted p-values, microtubule and cytoskeletal genes were also  
659 over represented (CCDC114, CFAP100, CFAP126, CLIC5, DNAAF1, DNAH11, DNAI2,  
660 GAS2L2, PARVG, SPAG17, TEK1, USH2A) as well as genes associated with vesicle lumen  
661 (COL11A1, COL8A1, ERP27). Overrepresented molecular functions included neurotrophin  
662 receptor associated terms (NTRK1) and peptidase regulatory roles (CD109, SERPINA3,  
663 SERPIND1). The complete GO results are included in **Supplemental Table 2**.

664 We also used GATHER (<http://changelab.uth.tmc.edu/gather/gather.py>) to broaden the search for  
665 relationships/pathways in the A $\beta$ 42 DEGs. Two GO terms were statistically significant for UP  
666 genes (FDR<0.05): *GO:0007267*: cell-cell signaling (ADRA1B, CPNE6, CXCL14, MME,  
667 TNFSF10, UTS2) and *GO:0007154*: cell communication (ADRA1B, COL19A1, CPNE6,  
668 CXCL14, DKK1, GRP, HAPLN1, MME, STAC2, TNFSF10, UTS2). DN genes included two  
669 overlapping GO terms: *GO:0015698*: inorganic anion transport and *GO:0006820*: anion transport  
670 (CLIC5 COL11A1 COL8A1 SLC12A1). KEGG pathways with an FDR<0.25 included  
671 hsa04080: Neuroactive ligand-receptor interaction (ADRA1B, GRP, UTS2) and hsa05010:  
672 Alzheimer's disease [MME] for UP genes. DN genes were hsa04512: ECM- receptor interaction  
673 (COK11A1, FNDC1). Complete GATHER results are included in **Supplemental Table S3**.

674 GSEA KEGG analysis (<http://software.broadinstitute.org/gsea/index.jsp>) is an additional way to  
675 discover potential pathway relationships and are not limited by by using a small list of input  
676 genes since input can be a rank order list of FC values for all detected genes. We performed  
677 GSEA using a rank ordered FC list (18,233 genes) and compared these to all KEGG pathways.  
678 The A $\beta$ 42 vs H9 list identified 118/170 KEGG gene sets that were upregulated. Twenty-two had  
679 a nominal p value <0.05 and 3 of these had an FDR <25%. The top scoring KEGG pathway was  
680 NEUROACTIVE LIGAND RECEPTOR INTERACTION (hsa04080, Normalized Enrichment  
681 Score=2.12, p<0.01, FDR=0.014). Our gene list included 79 of the 219 (36%) genes in this  
682 pathway suggesting widespread changes in neuroactive ligand receptor signaling was a  
683 consequence of direct A $\beta$ 42 expression. This can plausibly be related to the DN regulated  
684 expression of “cilia” related genes since primary cilia in neurons are believed to be a major  
685 organelle signaling hub known to express a host of neuroactive ligand receptors [53]. No KEGG  
686 pathways reached significance (FDR<0.05) for DN genes or for a separate analysis of ranked  
687 A $\beta$ 40 vs H9 DEG FC values. Summary results for the top 20 GSEA KEGG pathways for A $\beta$ 42  
688 vs H9 genes along with details of the KEGG NEUROACTIVE LIGAND RECEPTOR  
689 INTERACTION pathway are included in **Supplemental Table S4**.

690 We also analyzed DEGs using Ingenuity Pathway Analysis (IPA). Remarkably, for the A $\beta$ 42 vs  
691 H9 comparison, the highest and lowest z scores were obtained for the functions “Increased  
692 Neuronal Cell Death” (z = 1.658) and “Decreased Memory” (z = -2.213), two biological  
693 processes with obvious relevance to AD. Fig. 12 shows the individual DEGs identified by this  
694 analysis color coded by intensity for FC values. The “Decreased memory” and “Increased  
695 neuronal cell death” pathways are connected through the overlap of DKK1 and NTRK1. An IPA  
696 analysis for disease related pathways returned the “Neuroprotective Role of THOP1 in AD” as  
697 the top scoring canonical pathway (p = 9.95 E-3). This pathway was also significant for a  
698 hippocampal DEG analysis of LOAD RNA-Seq data [50]. Thimet oligopeptidase (product of  
699 THOP1) is reportedly neuroprotective for A $\beta$  toxicity in cortical neurons and can degrade  
700 soluble A $\beta$  but not aggregated A $\beta$ 42 [54,55]. The DEGs in the A $\beta$ 42 vs H9 comparison represent  
701 only a small fraction of the 40 genes in this pathway. They were MME (aka NEP, neprylisin)  
702 and SERPINA3 (aka ACT) (indicated on the bottom of Fig. 12). MME is not directly related to  
703 decreased memory in IPA, but is included because of its potential indirect relationship through  
704 GRP [56]. SERPINA3 is a member gene of the “Neuronal cell death” category in IPA and both

705 genes are part of the extracellular arm of the THOP1 in AD pathway in IPA. MME, is an A $\beta$   
706 degrading enzyme with increased expression in the A $\beta$ 42 edited cells and SERPINA3, is a serine  
707 protease inhibitor with decreased expression which co-localizes with A $\beta$  in AD plaques [57].

708 **[Fig. 12. DEGs are potentially related to Alzheimer's relevant pathways and functions. (Top),**  
709 **IPA pathway analysis of DEGs in the A $\beta$ 42 vs H9 comparison identified "decreased memory" (z =**  
710 **-2.213) and "increased neuronal cell death" (z = 1.658) as the lowest and highest scoring**  
711 **functional pathways. Individual genes are shown as graphic symbols representing molecule**  
712 **type and color coded by FC values (red=UP, green=DN). (Bottom), the most relevant IPA disease**  
713 **related canonical pathway was "Neuroprotective role of THOP1 in Alzheimer's disease" (p =**  
714 **9.95 E-03, overlap = 2 of 40 total genes in this pathway). The pathway genes were MME (aka**  
715 **NEP, neprilysin) an A $\beta$  degrading metalloproteinase and SERPINA3 (aka ACT, alpha-1**  
716 **antitrypsin) a protease inhibitor found in AD plaques (Top, circled in blue). MME is not directly**  
717 **included in the IPA "decreased memory" function but can potentially be indirectly related**  
718 **through its relationship to GRP.]**

719 There is no general consensus regarding a "signature" set of AD related DEGs, especially those  
720 that related to early LOAD pathogenic mechanisms making it challenging to relate our  
721 expression data with patient samples likely to contain signals from many different non-neuronal  
722 cell types, co-morbidities and many complex combinations of genetic variance. Nevertheless we  
723 did find some encouraging comparisons. For example, the GeneCards database  
724 (<https://www.genecards.org>) has 6,672 genes identified as "Alzheimer's related genes". This is a  
725 rather large list not restricted to DEG analysis but also including GWAS hits as well as other  
726 types of associations. For our UP genes we found 10/23 (43%) that overlapped (TNFSF10,  
727 DKK1, GRP, CALHM2, MME, ALDH1A2, CXCL14, PPP1R17, TMEM255A, HAPLN1) and  
728 17/70 (24%) DN genes (SHISA2, DNAH11, SERPIND1, SCN1A, APOL1, HP, ERP27,  
729 SERPINA3, STXBP6, CFAP70, PARVG, GDA, PCP4, NTRK1, TMC5, STOML3, RARRES3)  
730 suggesting some potential AD relevance. A recent RNA-Seq analysis of hippocampal tissue  
731 from SAD vs non-SAD patient samples [50] identified 2,064 DEGs. We found only 3 out of 23  
732 (13%) UP genes overlapped (not statistically significant; Fisher's exact test, p=0.46) (HAPLN1,  
733 CPNE6, TNFSF10). In contrast, 22 out of 70 (31%) DN genes overlapped (Fisher's exact test, p  
734 = 2.5x10<sup>-6</sup>) (DAW1, FAM216B, GDA, TCTEX1D1, PCP4, CCDC114, LRRC71, A4GALT,  
735 MAP3K19, TEK1, CD109, TMC5, RARRES3, LINC00880, PARVG, ANKRD66, FNDC1,  
736 DNAH11, C11orf88, ANKUB1, DNAI2, SERPINA3). Four of these DN genes had an opposite  
737 directional FC, while others agreed with our DEGs. This significant overlap suggests that DEGs  
738 in our A $\beta$ -dependent neuronal model may thus have relevance to the AD, including the possible  
739 involvement of cilia dysfunction as mentioned above.

## 740 Discussion

741 The plethora of genes, molecules, cell types and pathways implicated in extensive AD patient  
742 and experimental model organism studies have not yet identified critical factors that initiate and  
743 sustain the progressive clinical and pathological decline characteristic of this neurodegenerative  
744 disorder. Many investigators believe that A $\beta$  accumulation plays a key role in initiating

745 pathogenic processes, however the specific aggregated/oligomeric state responsible is  
746 controversial and we lack a clear understanding of mechanisms and pathways that link A $\beta$  to  
747 ND. Reasons for this are twofold: AD is an extremely complex disorder and most experimental  
748 models do not exhibit progressive ND as a phenotype [4]. Interesting exceptions to this  
749 phenotypic deficiency are mouse [11–14] or invertebrate [10] models that directly overexpress  
750 A $\beta$  rather than relying on its production via APP amyloidogenic proteolysis. A $\beta$ 42 direct  
751 expression models all exhibit chronic progressive ND. Human iPS AD models appear to be a  
752 promising way to experimentally investigate AD mechanisms in a human genetic context  
753 [22,58–60] but unfortunately they also fail to progress to ND.

754 In the current study, we used genomic editing to obtain isogenic hES cell lines that differ only in  
755 a single allele of the normal APP locus. This approach permitted a comparative analysis of  
756 phenotypes relative to unedited parental near isogenic cells, as well as independent analysis of  
757 direct expression of an equivalent amount of A $\beta$ 40 or A $\beta$ 42 since both edited alleles are under  
758 control of the endogenous rather strong APP promoter. We thus expected the strength and timing  
759 of direct expression would match APP itself but this was not the case. Developmental timing of  
760 expression agreed well with APP however expression levels of edited alleles were both ~30 fold  
761 lower. Our model is thus significantly different from other direct expression models where  
762 strong exogenous promoters are used that may complicate phenotypic interpretation because of  
763 potential overexpression artifacts. Overexpression of FAD genes, or even wild type APP, seems  
764 to susceptible to this complication in transgenic mouse AD models [4]. APP proteolysis is a  
765 complex process with both amyloidogenic and non-amyloidogenic pathways producing a host of  
766 other fragments that exhibit a variety of documented or potential phenotypic consequences [61].  
767 The phenotypic results we describe are due to direct expression and thus not likely to be  
768 confounded by non-A $\beta$  peptides. No amyloidogenesis is required for A $\beta$  generation and APP  
769 expression is reduced ~50% by our editing strategy.

770 The near isogenic nature of our cell lines ensures that phenotypic results are additionally not  
771 confounded by genetic variance, known to have small but significant cumulative effects on AD  
772 risk. This is an uncontrolled variable in some patient derived iPS models. Additionally, our cell  
773 lines may have potential relevance to SAD since no AD FAD related mutants [62] were used and  
774 the cells all have the APOE  $\epsilon$ 3/ $\epsilon$ 4 genotype which is associated with a large fraction of SAD  
775 cases [49]. We extensively characterized two independently isolated clones for each edited  
776 genotype and did not observe significant phenotypic differences within each edited genotype. It  
777 is therefore unlikely that phenotypes are a result of off target effects or low level mutations  
778 which may occur during stem cell editing [32].

### 779 Neurodegeneration

780 One principal finding of this study is that direct expression of secretory A $\beta$ 40 or A $\beta$ 42 in  
781 cultured human neurons is sufficient to result in a host of AD-like phenotypes up to and  
782 including progressive ND. Progressive ND has not been adequately modeled in other non-  
783 human animal [6] or current human cellular AD models [22,60] and this phenotypic deficiency  
784 has led in part to some of the controversy regarding the role of A $\beta$  in AD [20,63]. The amyloid  
785 hypothesis [18] proposes that A $\beta$  is a primary driver for a host of downstream pathogenic

786 cascades terminating in ND. Direct A $\beta$  expression is a simple test of this postulate and our  
787 results strongly support it, with the caveat that intraneuronal accumulation, rather than  
788 extracellular action appears to be responsible for phenotypic changes. Significant experimental  
789 evidence supports an intraneuronal site of action for A $\beta$ 42 proteotoxicity [64].

790 Some major competing hypotheses suggest other key non-A $\beta$  mechanisms mediate ND such as  
791 tau-hyperphosphorylation, neurofibrillary tangle formation, generation of non-A $\beta$  proteolytic  
792 fragments of APP or pathological action of non-neuronal cell types (i.e. astrocytes or microglial).  
793 Our results suggest that these AD associated pathologies are not necessary for progressive ND in  
794 cultured human neurons. We did not observe neurofibrillary tangles and only a modest tau  
795 redistribution in cultures where ND was nearly complete. Additionally, neurons appear to be the  
796 near exclusive cell type present in our cultures suggesting that A $\beta$  proteotoxicity is neuronal  
797 autonomous. Importantly, direct expression of A $\beta$  is also necessary to generate the phenotypes  
798 we describe, including ND, since neurons derived from unedited parental cells could be  
799 maintained up to 266 days while no edited neurons survived beyond 120 days. Finally, the ND  
800 we observe is chronic and progressive like AD and thus differs from the well-established acute  
801 cellular toxicity of non-physiological concentrations A $\beta$ .

802 AD is not considered a developmental disease, but rather a condition restricted to old age. This  
803 presents a significant challenge for stem cell derived culture models. We could detect significant  
804 expression of edited A $\beta$  transcripts in stem cell cultures, during the ~1-month long EB process  
805 and during the initial stage of neuronal differentiation. However, we did not observe any major  
806 morphologic or molecular differences related to this early exposure to A $\beta$ . Stem cell and  
807 differentiation markers, neurogenesis and neuronal marker gene expression were similar for all 3  
808 genotypes in 10 day post EB cultures. We did note that cultures of both edited genotypes  
809 sometimes appeared to self-organize into neuronal collections at slightly earlier times than  
810 unedited H9 cells (i.e. the cells were often closer together and more likely to bear small process  
811 at the earliest differentiation stages (i.e. up to ~7-10 days of in neural differentiation media). This  
812 is consistent with a reported “neurogenic” effect of ES cells exposed to A $\beta$  [65]. Direct A $\beta$   
813 expression thus does not appear to adversely affect neuronal developmental processes in our  
814 culture system or the ability of neurons to self-organize into NCs.

#### 815 Phenotypic timeline

816 The earliest AD-related phenotypic change we observed for edited relative to unedited cultures  
817 was a greater accumulation of aggregated/oligomeric A $\beta$ . This was more prominent at earlier  
818 times for A $\beta$ 42 cultures and correlated with the rate of decreased neuronal viability. A $\beta$ 42  
819 samples had small but significant reduction in neuronal viability even at 10 days while A $\beta$ 40  
820 samples did not. By 35 days the level of aggregated/oligomeric A $\beta$  was significantly higher in  
821 A $\beta$ 42 cultures which also had significant more ND. 35-day A $\beta$ 40 cultures appear to trend  
822 toward reduced viability but did not reach statistical significance. Direct expression of A $\beta$ 42  
823 thus is more toxic to human neurons relative to A $\beta$ 40. This agrees with the known in vitro and  
824 in vivo propensity of A $\beta$ 42 to more rapidly form aggregates or oligomers relative to A $\beta$ 40 and

825 suggests that accumulation of aggregated/oligomerized A $\beta$  likely explains the differential rate of  
826 ND.

827 Levels of aggregated A $\beta$ 42 were maximal in 32-day old A $\beta$ 42 cultures, intermediate in A $\beta$ 40  
828 cultures and only present in small amounts in unedited cells. Since both peptides are produced  
829 under the same genetic control, our data suggest that cellular mechanisms for A $\beta$  removal may  
830 operate more efficiently for A $\beta$ 40 than for A $\beta$ 42 in human neurons, a result consistent with other  
831 direct expression models [11,16]. The low levels of aggregated A $\beta$  accumulation in unedited  
832 cells do not appear to be progressive and ND is not a prominent feature of these cultures  
833 providing additional support for a direct relationship between accumulation of  
834 aggregated/oligomerized A $\beta$  and eventual ND.

835 Interestingly, the aggregated A $\beta$  appears to be primarily intracellular and appears to accumulate  
836 initially in small vesicles, a result consistent with early endosomal accumulation of A $\beta$  in AD  
837 now believed to be a major site of pathological amyloidogenic processing [64]. Both edited  
838 genes contain a normal secretory signal sequence to route peptide production through the normal  
839 secretory vesicular pathway, similar to APP. Since we were unable to detect peptide in culture  
840 media we don't know if A $\beta$  peptides were secreted at comparable levels and/or if they were then  
841 reinternalized in endocytic vesicles. In other direct expression AD models A $\beta$ 42 appears to be  
842 preferentially retained or endocytosed by neurons relative to A $\beta$ 40 [11,17]. Secretion and  
843 reuptake of A $\beta$  has also been suggested in cultured neurons or early stage AD patient samples  
844 [66].

845 With respect to endocytosis, we saw a significant increase in accumulation of both lysosomes  
846 (LAMP1 positive structures) and early endosomes (Rab5 positive structures) in A $\beta$ 42 edited  
847 neurons suggesting abnormalities in these particular vesicular pathways. Early endosomes  
848 containing A $\beta$  may potentially mature and fuse with lysosomes which are in part a common  
849 intracellular vesicular transport pathway. Altered endo/lysosomal pathway function has  
850 previously been reported in early stage AD brain as well numerous mouse AD models and FAD  
851 iPS models [36,43]. The low internal pH of maturing endosomes and lysosomal/endosomal  
852 fusions would likely promote A $\beta$  aggregation. The 7A1a antibody we used in this study  
853 specifically detects aggregated A $\beta$ 42 in vesicle compartments in *Drosophila* neurons [17]. The  
854 increased number of lysosomes and endosomes was not maintained at longer culture times,  
855 possibly because of increased ND at these later stages. This is consistent with proposals for how  
856 intracellular A $\beta$  aggregates could eventually form extracellular plaque structures, a defining  
857 feature of AD pathology [17,67]. Notably we did not observe extracellular plaque like structures  
858 possibly because they may be removed during frequent media changes. A cause-effect  
859 relationship between extracellular plaques and AD pathology has not been definitively  
860 established.

#### 861 A $\beta$ and pyknosis

862 An interesting correlation we observed was the close spatial association of  
863 aggregated/oligomeric A $\beta$  and pyknotic neuronal nuclei. This type of nuclear fragmentation is a  
864 defining characteristic of apoptotic cell death, but is also seen in other types of cell death [68].

865 Notably, this correlation was not strictly dependent on direct A $\beta$  expression since it was  
866 observed in unedited samples. Pyknosis may thus be related to low levels of amyloidogenic APP  
867 processing in the unedited neurons. The mechanism(s) of neuronal death in AD is not  
868 completely established, however, some evidence for apoptosis has been described in more  
869 accessible cell culture and animal models [69]. Direct injection of small amounts of A $\beta$ 42  
870 peptide or an episome expressing A $\beta$ 42 into the cytoplasm results in acute toxicity of primary  
871 cultured human neurons. Cell death was mediated through p53/BAX dependent apoptosis and  
872 associated with significant evidence of condensed nuclear chromatin [70]. In this same study,  
873 A $\beta$ 40 was not toxic in contrast to our results. The A $\beta$ 40 toxicity we describe, however, only  
874 manifests at a significantly later culture time relative to A $\beta$ 42 cultures and the cytoplasmic  
875 injection results were obtained only a short time after injection perhaps explaining this  
876 difference.

#### 877 Direct A $\beta$ 40 expression suggests a human specific phenotype

878 The delayed toxicity we observe for A $\beta$ 40 diverges significantly from findings in both rodent  
879 and *Drosophila* direct A $\beta$  overexpression models where A $\beta$ 40 expression appears to be  
880 relatively limited in its ability to generate AD-like phenotypes [11,13–15]. In *Drosophila*, high  
881 levels of A $\beta$ 40 over expression in cholinergic neurons appear beneficial as they extend the  
882 lifespan [16]. The absence of A $\beta$ 40 toxicity in flies is likely due to increased secretion or  
883 intracellular removal relative to A $\beta$ 42 which preferentially aggregates within intracellular  
884 endolysosomal vesicles [17]. Rodent direct A $\beta$ 40 models produce human peptide (from the  
885 transgene) in the context of endogenous production of rodent A $\beta$  peptides (from the endogenous  
886 mouse gene). These peptides have 3 different specific amino acids that could modify the human  
887 peptides ability to form toxic aggregates or oligomers. Different combinations of A $\beta$  peptides  
888 are known to interfere with the rate of formation of aggregates/oligomers as well as their  
889 structural type [71]. This is consistent with the possibility that shorter A $\beta$ 40 peptides (or  
890 sequence divergent rodent peptides) could prevent toxicity of A $\beta$ 42 in rodent models. The  
891 *Drosophila* homologue of APP does not contain any A $\beta$  sequence so it would not be subject to  
892 the same process. Additionally, a recent human-mouse hybrid AD model also observed human  
893 specific ND in response to mouse neuronal production of FAD derived amyloidogenic A $\beta$  [72].

894 Our unedited cultures clearly produce small amounts of aggregated A $\beta$  and this process also  
895 likely occurs in edited cells (i.e. APP expressed from the unedited allele). It is possible that a  
896 small amount of amyloidogenic derived A $\beta$  could act as a “seed” to stimulate additional  
897 aggregation/oligomerization of directly expressed A $\beta$ 40 and A $\beta$ 42. Such a process could  
898 account for the ND properties of our model. Further study will be required to examine this  
899 possibility. Many AD related studies use incompletely defined oligomers of A $\beta$  isolated from  
900 AD brain that seem to have the ability to specifically initiate several AD-like phenotypes [73].  
901 The exact structure of proteotoxic A $\beta$  assemblies are still imprecisely defined, but generally  
902 believed to be smaller oligomers. It will be interesting to compare the A $\beta$  structures present in  
903 our cultures with those isolated from AD brain.

904 **Synaptic deficits**

905 We document a deficit in synapsin1 stained puncta in 34-day old cultures which was specific for  
906 A $\beta$ 42 edited cells at this culture age. Synaptic deficits are an early AD phenotype but have rarely  
907 been reported in human AD culture models [22]. Other experimental models attribute synaptic  
908 deficits to an increased production of A $\beta$  associated with increased synaptic activity, or a  
909 complex relationship to amyloidogenesis (sometimes involving non-A $\beta$ 40 or A $\beta$ 42 APP derived  
910 proteolytic products) or even a tau dependence [40]. The deficit we observe is most likely a  
911 direct result of A $\beta$ 42 aggregation/oligomerization since amyloidogenic processing is likely to be  
912 minimal in edited cultures. Additionally, we do not observe tau related phenotypes until much  
913 later culture ages suggesting that the synaptic deficit is not mediated by tau dependent  
914 pathogenic processes. Importantly, we did not distinguish between the failure to form synapses  
915 or their increased removal which would require additional observations.

916 **Phenotypic changes appear to be neuron specific**

917 We used H9 ES cells as the parental genotype in this study since they are widely used in many  
918 neuronal differentiation protocols, have been successfully edited and have a SAD associated  
919 APO $\epsilon$ 4/APO $\epsilon$ 3 genotype [49]. An ongoing challenge in constructing relevant neurodegenerative  
920 stem cell models is differentiation to specific cell types involved in the disease [60]. Many types  
921 of neurons degenerate in AD and we initially tested a differentiation protocol designed to  
922 produce an enrichment of cholinergic basal forebrain-like neurons that was used to generate H9  
923 derived neurons susceptible to A $\beta$ 42 oligomers [74]. Unfortunately, we could not reliably obtain  
924 differentiated neurons that could be maintained in culture for more than a few weeks. Successful  
925 generation of cholinergic neurons was also minimal, suggesting that protocols to generate basal  
926 fore brain neurons may still need improvement [75].

927 The work presented in this communication used a protocol originally developed to generate  
928 enrichment of limb motor neurons [29], a neuronal type not generally affected in AD. We note  
929 however that RNA-Seq data suggests a neuronal population significantly more complex than  
930 primarily limb motor neurons. First, low levels of CHAT expression were detected and only  
931 ~10-20% of NeuN positive cells were positive for staining with an anti-choline acetyltransferase  
932 antibody (data not shown). No muscle cells are present and their absence, especially in longer  
933 term cultures would likely have a significant effect on the ultimate state of motor neuron  
934 differentiation. We detect expression of GAD1 and GAD2, TH and SLC17A7, suggesting  
935 additional non-motor neuron neurotransmitter phenotypes are present. It is likely that we derived  
936 a neuronal cell population biased towards caudal, rather than rostral differentiation. For example,  
937 caudal HOXB4, HOXB6 and HOXA1 levels were high but not GLRA1 and MNX1. Likewise,  
938 some but not all rostral genes agree with a more rostral fate (i.e. high levels of rostral CUX1,  
939 SATB2, RELN and DAB1 but low levels of TBR1 FOXG1 and NKX2-1). A direct comparison  
940 of these two general classes of neurons in iPS cultures established greater early stage AD-related  
941 phenotypic elaboration in rostral neurons, however the differences were not large and were  
942 possibly related to differences in the rate of amyloidogenesis rather than the direct expression we  
943 use here [76].



944 It is clear from RNA-Seq data that our cultures are primarily neuronal (ie. high level expression  
945 of DCX, TUBB3 and MAPT) in good agreement with ~90% of cells reliably staining with  
946 antibody to either NeuN, Tuj1 or DCX. We also detected very low and marginally significant  
947 expression of astrocytic markers ALDH1L2, GFAP; oligodendrocyte marker OLIGO2 and  
948 microglial marker TREM2 and AIF1 but did not observe any cells with characteristic  
949 morphology of these glial cell types. One necessary modification we made to the original  
950 differentiation protocol [29] was a weekly 24 hour exposure to EdU to suppress mitotic cell  
951 overgrowth (continued up to ~50-60 days of differentiation). This treatment is likely to eliminate  
952 the bulk of late appearing glial cell types. The cell population we studied should therefore be  
953 considered as “mixed” but primarily or exclusively neuronal. **Supplementary Table S5**  
954 contains the relative expression derived from RNA-Seq read data for selected cell type specific  
955 genes normalized to the mean expression for all detected genes and includes data for a few  
956 selected primary AD genes.

#### 957 [Tau related phenotypes](#)

958 We did not observe genotype specific differences in the levels of phospho-tau, only a  
959 redistribution from neural processes to primarily somal regions in edited samples likely related to  
960 fewer neuronal processes in dead/dying neurons at late culture times. In contrast, human cell  
961 models of FAD iPS cells grown as organoids or FAD genes overexpressed in neural precursor  
962 cells differentiated in a 3-D matrix successfully elaborate aspects of tau related phenotypes, even  
963 AD-like neurofibrillary tangle formation [25,26]. The 3-D culture format has been suggested to  
964 be critical for these tau phenotypes, so the absence of tau pathology in our model could simply  
965 be a result of the comparatively small size of the NCs (i.e. ~10-16  $\mu\text{m}$  of thickness and a range of  
966 lateral dimensions which varies ~2-3 fold among independent differentiations). An alternative  
967 explanation, however is possible. Tau related pathology may be related primarily to non-A $\beta$   
968 dependent APP fragments [77]. These non-A $\beta$  APP fragments are likely present in higher  
969 amounts in both the FAD organelle model as well as the FAD overexpression model but not in  
970 our edited cells. Consistent with this possibility, cell models constructed with a Down syndrome  
971 genotype elaborate both A $\beta$  and tau pathology but similar to these organoid and matrix 3D  
972 models, synaptic deficits and ND are not [78]. Increased phosphorylation of tau, but not  
973 neurofibrillary tangles, was a feature of degenerating human neurons transplanted into the brain  
974 of FAD expressing mice [72]. Clearly additional work is needed to understand the complex  
975 relationship between A $\beta$  and tau. It may be significant however that a mouse/human hybrid  
976 model and our model suggest that extensive tau pathology is not strictly necessary for  
977 progressive A $\beta$ -dependent ND.

#### 978 [APOE allele type](#)

979 APOE  $\epsilon 4$  and its relationship to AD pathogenesis is complex and incompletely understood,  
980 especially with respect to specific brain cell types mediating AD-like phenotypes [79]. APOE  
981 allele type involves both A $\beta$ -dependent and independent roles and has been associated with  
982 increased neuronal amyloidogenic A $\beta$  production as well as important astrocyte or microglial  
983 roles in A $\beta$  removal [80–82]. Since our cultures do not depend on amyloidogenesis and are  
984 primarily neuronal, these mechanisms are unlikely to contribute to edit specific phenotypic

985 changes. More likely, APOE  $\epsilon$ 4 may facilitate neuronal uptake of potentially secreted A $\beta$ 42 via  
986 endocytosis [83,84]. Alternatively, A $\beta$  may be retained within recycling endosomes since  
987 accumulation of aggregated/oligomeric A $\beta$  appears to be initially localized to small putative  
988 vesicular compartments and we were unable to detect it in culture media. Either of these  
989 possibilities agree with the endolysosomal dysfunction phenotypes we observed and are  
990 consistent with an intraneuronal role for A $\beta$  toxicity. While a pathologic role for intraneuronal  
991 A $\beta$  was initially contentious, it is now well supported by a variety of evidence, but still lacks a  
992 specific mechanism [64].

993 Neurons under stress are known to increase APOE expression [79] and we did see a modest  
994 increase in edited cell lines relative to H9 cells (see **Supplemental Table S5**). CRISPR edited  
995 homozygous  $\epsilon$ 4 human iPS derived neurons have a toxic gain-of-function phenotype which was  
996 sufficient to cause ND of GABAergic neurons [85]. This phenotype was human specific, was  
997 accompanied by increased amyloidogenesis and also had increased neuronal phospho-tau which  
998 was not related to increased A $\beta$  production. Another recent study used independent cell type  
999 specific differentiation of edited iPS cells to examine neuronal APOE allele type dependent  
1000 phenotypes [86] and confirmed that  $\epsilon$ 4 astrocytes and microglial-like cells can clear extracellular  
1001 A $\beta$  but also established significant  $\epsilon$ 4 dependent changes in neuronal gene expression some of  
1002 which were related to synaptic function which could be relevant to the synaptic deficits we  
1003 observed.

1004 We also measured very low levels of glial specific marker genes (GFAP, OLIG2 and TREM2  
1005 and AIF1; see **Supplementary Table S5**) so we cannot definitively exclude contributions from  
1006 these non-neuronal cell types without additional observations, however, no positive anti-GFAP  
1007 staining was detected at any culture stage (data not shown).

#### 1008 Gene Expression

1009 DEGs that showed a more significant change with greater magnitude in A $\beta$ 42 compared to A $\beta$ 40  
1010 samples suggesting that common pathways may be affected. This agrees well with the exclusive  
1011 and/or more penetrant phenotypic changes in A $\beta$ 42 samples at the time mRNA was isolated for  
1012 RNA-Seq analysis. There thus appears to be a strong relationship between A $\beta$ -dependent  
1013 phenotypes and DEGs in these cultures.

1014 Are they also related to AD? We identified a relatively small number of genes compared to  
1015 extensive AD whole transcriptome expression profiling or other iPS cellular AD models where  
1016 hundreds to thousands of genes can be differentially expressed [50,87]. This numerical  
1017 difference could be explained by many factors including intrinsic genetic variance, differences in  
1018 tissue and cell type sampling, co-morbidities or life style differences not represented in an  
1019 isogenic culture model. Perhaps more likely, patient material reflects the full spectrum of AD  
1020 phenotypes, including tau pathology and non-neuronal inflammatory glial responses while our  
1021 cultures are more likely to represent earlier A $\beta$ -specific putative disease related processes.  
1022 Despite these considerations, comparison of our data with patient derived RNA-Seq expression  
1023 data shows some selective overlap. Comparison to an AD vs non-AD study of temporal cortex  
1024 samples [88] revealed that 88% (82/93) of our DEGs overlap with 51% (42) having the same

1025 directional FC. A comparison to a hippocampal study [50] identified 39% (36) genes with  
1026 overlap and 67% (24) of these had the same directional negative FC (i.e. decreased expression).  
1027 IPA analysis surprisingly identified “increased neuronal loss” and “decreased memory” two  
1028 processes with obvious relevance to AD and identified the involvement of the neuroprotective  
1029 role of THIOPI1 in AD as a significant disease related pathway. These comparisons and analysis  
1030 suggest potential relevance of the DEGs to AD which seems more prominent for down regulated  
1031 genes.

1032 Annotation/enrichment analysis indicates that several of our downregulated DEGs related to  
1033 cilia, an organelle not usually associated with AD. This suggests that cilia dysfunction may be  
1034 caused by direct A $\beta$  expression in edited cultures. Five overlapping cilia related genes are also  
1035 downregulated in AD hippocampus [50] (DAW1, DNAH11, DNAI2, GDA, TEKT1) suggesting  
1036 that this organelle could also be compromised in patients. Neurons usually contain a primary  
1037 non-motile cilia [53] believed to function as a major signaling center integrating environmental  
1038 information through a wide variety of localized G-protein coupled and other types of neuroactive  
1039 ligand receptors [89]. Notably, the KEGG Neuroactive Ligand Receptor Interaction pathway (see  
1040 **Supplemental Table S4**), the top scoring pathway we identified by GSEA, suggesting that  
1041 neuroactive signaling is broadly disrupted in our A $\beta$ 42 edited cultures. Ciliary functions have  
1042 been best studied in sensory neurons which contain specialized types of primary cilia.  
1043 Interestingly, olfactory neurons have been shown to have A $\beta$ -dependent connectivity defects  
1044 [90] and be a primary problem in certain types of retinal degeneration [53]. Cerebellar ciliary  
1045 dysgenesis is prominent in dominant spinocerebellar ataxia type 11 caused by a dominant  
1046 mutation in tau kinase 2 (TTBK2) [91]. These observations suggest that ciliary dysfunction may  
1047 thus be intimately related to ND. Neuronal cilia play important roles in neurogenesis, axon  
1048 guidance, establishment/maintenance of cell polarity, and even synaptic and memory functions  
1049 [92,93]. Additionally, cilia have a striking similarity to dendritic spines that includes their  
1050 protein and membrane composition as well as their receptive functions [94]. Our results suggest  
1051 that disruption of primary cilia may be an important aspect of A $\beta$ -dependent ND which should  
1052 be examined in future studies.

1053 Future AD therapeutic development may critically depend on identifying specific molecular and  
1054 cellular mechanisms coupling A $\beta$  to progressive ND [95]. The culture model we describe here  
1055 may thus be a useful new tool to identify these largely unknown details. This simple neuronal  
1056 culture model could additionally be a useful tool to identify new therapeutic targets and agents so  
1057 desperately needed by the growing population of AD patients [96]. While cell culture models  
1058 may never be able to generate the full complexity of AD disease phenotypes, they are likely to be  
1059 important for solving many pieces of the puzzle and the exact pathogenic role of A $\beta$   
1060 accumulation within or around human neurons seems like an important step forward.

## 1061 Acknowledgments

1062 We are grateful to the Sidell-Kagan Foundation for their support of this work. Additional funds  
1063 were provided by a City of Hope facilities grant for RNA-Seq analysis. Salary support for T.U.  
1064 was provided by a CIRM Bridges Program Grant (TB1-01185) awarded to Dr. Nicole

1065 Bournias. We wish to thank Ms. Tammy Chang for valuable advice and guidance regarding  
1066 work with human stem cells and Dr. Jessica Kurata for help with the GSEA analysis.

## 1067 References

- 1068 1. Jack CR, Albert MS, Knopman DS, McKhann GM, Sperling RA, Carrillo MC, et al.  
1069 Introduction to the recommendations from the National Institute on Aging-Alzheimer's  
1070 Association workgroups on diagnostic guidelines for Alzheimer's disease. *Alzheimer's*  
1071 *Dement.* Elsevier Ltd; 2011;7: 257–262. doi:10.1016/j.jalz.2011.03.004
- 1072 2. Hyman BT, Phelps CH, Beach TG, Bigio EH, Cairns NJ, Carrillo MC, et al. National  
1073 Institute on Aging–Alzheimer's Association guidelines for the neuropathologic  
1074 assessment of Alzheimer's disease. *Alzheimer's Dement.* 2012;8: 1–13.  
1075 doi:10.1016/j.jalz.2011.10.007
- 1076 3. Cummings JL, Morstorf T, Zhong K. Alzheimer's disease drug-development pipeline: few  
1077 candidates, frequent failures. *Alzheimers Res Ther.* 2014;6: 37. doi:10.1186/alzrt269
- 1078 4. Sasaguri H, Nilsson P, Hashimoto S, Nagata K, Saito T, De Strooper B, et al. APP mouse  
1079 models for Alzheimer's disease preclinical studies. *EMBO J.* 2017;36: 2473–2487.  
1080 doi:10.15252/embj.201797397
- 1081 5. Zahs KR, Ashe KH. “Too much good news” - are Alzheimer mouse models trying to tell  
1082 us how to prevent, not cure, Alzheimer's disease? *Trends in Neurosciences.* 2010. pp.  
1083 381–389. doi:10.1016/j.tins.2010.05.004
- 1084 6. Drummond E, Wisniewski T. Alzheimer's disease: experimental models and reality. *Acta*  
1085 *Neuropathol.* Springer Berlin Heidelberg; 2017;133: 155–175. doi:10.1007/s00401-016-  
1086 1662-x
- 1087 7. Ballatore C, Lee VM-Y, Trojanowski JQ. Tau-mediated neurodegeneration in  
1088 Alzheimer's disease and related disorders. *Nat Rev Neurosci.* 2007;8: 663–672.  
1089 doi:10.1038/nrn2194
- 1090 8. Oddo S, Caccamo A, Shepherd JD, Murphy MP, Golde TE, Kaye R, et al. Triple-  
1091 transgenic model of Alzheimer's disease with plaques and tangles: intracellular Abeta and  
1092 synaptic dysfunction. *Neuron.* 2003/08/05. 2003;39: 409–421. doi:S0896627303004343  
1093 [pii]
- 1094 9. Ghetti B, Oblak AL, Boeve BF, Johnson KA, Dickerson BC, Goedert M. Invited review:  
1095 Frontotemporal dementia caused by microtubule-associated protein tau gene ( MAPT )  
1096 mutations: a chameleon for neuropathology and neuroimaging. *Neuropathol Appl*  
1097 *Neurobiol.* 2015;41: 24–46. doi:10.1111/nan.12213
- 1098 10. Iijima-Ando K, Iijima K. Transgenic *Drosophila* models of Alzheimer's disease and  
1099 tauopathies. *Brain Struct Funct.* 2009;214: 245–262. doi:10.1007/s00429-009-0234-4
- 1100 11. Abramowski D, Rabe S, Upadhaya AR, Reichwald J, Danner S, Staab D, et al. Transgenic  
1101 expression of intraneuronal Abeta42 but not Abeta40 leads to cellular Abeta lesions,  
1102 degeneration, and functional impairment without typical Alzheimer's disease pathology. *J*  
1103 *Neurosci.* 2012/01/27. 2012;32: 1273–1283. doi:32/4/1273 [pii]

- 1104 10.1523/JNEUROSCI.4586-11.2012
- 1105 12. Lewis P, Piper S, Baker M, Onstead L, Murphy M, Hardy J, et al. Expression of BRI-  
1106 amyloid beta peptide fusion proteins: a novel method for specific high-level expression of  
1107 amyloid beta peptides. *Biochim Biophys Acta*. 2001;1537: 58–62. doi:S0925-  
1108 4439(01)00054-0 [pii]
- 1109 13. LaFerla FM, Tinkle BT, Bieberich CJ, Haudenschild CC, Jay G. The Alzheimer's A beta  
1110 peptide induces neurodegeneration and apoptotic cell death in transgenic mice. *Nat Genet*.  
1111 1995;9: 21–30. Available:  
1112 [http://www.ncbi.nlm.nih.gov/entrez/query.fcgi?cmd=Retrieve&db=PubMed&dopt=Citati](http://www.ncbi.nlm.nih.gov/entrez/query.fcgi?cmd=Retrieve&db=PubMed&dopt=Citation&list_uids=7704018)  
1113 [on&list\\_uids=7704018](http://www.ncbi.nlm.nih.gov/entrez/query.fcgi?cmd=Retrieve&db=PubMed&dopt=Citation&list_uids=7704018)
- 1114 14. McGowan E, Pickford F, Kim J, Onstead L, Eriksen J, Yu C, et al. A $\beta$ 42 Is Essential for  
1115 Parenchymal and Vascular Amyloid Deposition in Mice. *Neuron*. 2005;47: 191–199.  
1116 doi:10.1016/j.neuron.2005.06.030
- 1117 15. Iijima K, Liu H-PP, Chiang A-SS, Hearn SA, Konsolaki M, Zhong Y. Dissecting the  
1118 pathological effects of human Abeta40 and Abeta42 in *Drosophila*: a potential model for  
1119 Alzheimer's disease. *Proc Natl Acad Sci U S A*. 2004;101: 6623–6628. Available:  
1120 [http://www.ncbi.nlm.nih.gov/entrez/query.fcgi?cmd=Retrieve&db=PubMed&dopt=Citati](http://www.ncbi.nlm.nih.gov/entrez/query.fcgi?cmd=Retrieve&db=PubMed&dopt=Citation&list_uids=15069204)  
1121 [on&list\\_uids=15069204](http://www.ncbi.nlm.nih.gov/entrez/query.fcgi?cmd=Retrieve&db=PubMed&dopt=Citation&list_uids=15069204)
- 1122 16. Ling D, Song H-J, Garza D, Neufeld TP, Salvaterra PM. Abeta42-Induced  
1123 Neurodegeneration via an Age-Dependent Autophagic-Lysosomal Injury in *Drosophila*.  
1124 Cookson MR, editor. *PLoS One*. 2009;4: e4201. doi:10.1371/journal.pone.0004201
- 1125 17. Ling D, Magallanes M, Salvaterra PM. Accumulation of Amyloid-Like A $\beta$  1–42 in AEL  
1126 (Autophagy–Endosomal–Lysosomal) Vesicles: Potential Implications for Plaque  
1127 Biogenesis. *ASN Neuro*. 2014;6: AN20130044. doi:10.1042/AN20130044
- 1128 18. Selkoe DJ, Hardy J. The amyloid hypothesis of Alzheimer's disease at 25 years. *EMBO*  
1129 *Mol Med*. 2016;8: 1–14. doi:10.15252/emmm.201606210
- 1130 19. Musiek ES, Holtzman DM. Three dimensions of the amyloid hypothesis: time, space and  
1131 “wingmen.” *Nat Neurosci*. 2015;18: 800–806. doi:10.1038/nn.4018
- 1132 20. Benilova I, Karran E, De Strooper B. The toxic A $\beta$  oligomer and Alzheimer's disease: an  
1133 emperor in need of clothes. *Nat Neurosci*. Nature Publishing Group; 2012;15: 349–357.  
1134 doi:10.1038/nn.3028
- 1135 21. Gordon BA, Blazey TM, Su Y, Hari-Raj A, Dincer A, Flores S, et al. Spatial patterns of  
1136 neuroimaging biomarker change in individuals from families with autosomal dominant  
1137 Alzheimer's disease: a longitudinal study. *Lancet Neurol*. 2018; 241–250.  
1138 doi:10.1016/S1474-4422(18)30028-0
- 1139 22. Mungenast AE, Siegert S, Tsai L-H. Modeling Alzheimer's disease with human induced  
1140 pluripotent stem (iPS) cells. *Mol Cell Neurosci*. Elsevier Inc.; 2016;73: 13–31.  
1141 doi:10.1016/j.mcn.2015.11.010
- 1142 23. Israel MA, Yuan SH, Bardy C, Reyna SM, Mu Y, Herrera C, et al. Probing sporadic and  
1143 familial Alzheimer's disease using induced pluripotent stem cells. *Nature*. 2012/01/27.

- 1144 2012;482: 216–220. doi:10.1038/nature10821
- 1145 24. Yagi T, Ito D, Okada Y, Akamatsu W, Nihei Y, Yoshizaki T, et al. Modeling familial  
1146 Alzheimer’s disease with induced pluripotent stem cells. *Hum Mol Genet.* 2011/09/09.  
1147 2011;20: 4530–4539. doi:10.1093/hmg/ddr394
- 1148 25. Choi SH, Kim YH, Hebisch M, Sliwinski C, Lee S, D’Avanzo C, et al. A three-  
1149 dimensional human neural cell culture model of Alzheimer’s disease. *Nature.* Nature  
1150 Publishing Group; 2014;515: 274–278. doi:10.1038/nature13800
- 1151 26. Raja WK, Mungenast AE, Lin Y-T, Ko T, Abdurrob F, Seo J, et al. Self-Organizing 3D  
1152 Human Neural Tissue Derived from Induced Pluripotent Stem Cells Recapitulate  
1153 Alzheimer’s Disease Phenotypes. Padmanabhan J, editor. *PLoS One.* 2016;11: e0161969.  
1154 doi:10.1371/journal.pone.0161969
- 1155 27. D’Avanzo C, Aronson J, Kim YH, Choi SH, Tanzi RE, Kim DY. Alzheimer’s in 3D  
1156 culture: Challenges and perspectives. *BioEssays.* 2015;37: 1139–1148.  
1157 doi:10.1002/bies.201500063
- 1158 28. Cermak T, Doyle EL, Christian M, Wang L, Zhang Y, Schmidt C, et al. Efficient design  
1159 and assembly of custom TALEN and other TAL effector-based constructs for DNA  
1160 targeting. *Nucleic Acids Res.* 2011/04/16. 2011;39: e82. doi:gkr218  
1161 [pii]10.1093/nar/gkr218
- 1162 29. Amoroso MW, Croft GF, Williams DJ, O’Keeffe S, Carrasco MA, Davis AR, et al.  
1163 Accelerated High-Yield Generation of Limb-Innervating Motor Neurons from Human  
1164 Stem Cells. *J Neurosci.* 2013;33: 574–586. doi:10.1523/JNEUROSCI.0906-12.2013
- 1165 30. Schindelin J, Arganda-Carreras I, Frise E, Kaynig V, Longair M, Pietzsch T, et al. Fiji: an  
1166 open-source platform for biological-image analysis. *Nat Methods.* Nature Publishing  
1167 Group, a division of Macmillan Publishers Limited. All Rights Reserved.; 2012;9: 676–  
1168 682. doi:10.1038/nmeth.2019
- 1169 31. Genin E, Hannequin D, Wallon D, Sleegers K, Hiltunen M, Combarros O, et al. APOE  
1170 and Alzheimer disease: a major gene with semi-dominant inheritance. *Mol Psychiatry.*  
1171 2011;16: 903–7. doi:10.1038/mp.2011.52
- 1172 32. Woodruff G, Young JE, Martinez FJ, Buen F, Gore A, Kinaga J, et al. The Presenilin-1  
1173  $\Delta E9$  Mutation Results in Reduced  $\gamma$ -Secretase Activity, but Not Total Loss of PS1  
1174 Function, in Isogenic Human Stem Cells. *Cell Rep.* The Authors; 2013;5: 974–985.  
1175 doi:10.1016/j.celrep.2013.10.018
- 1176 33. Bergström P, Agholme L, Nazir FH, Satir TM, Toombs J, Wellington H, et al. Amyloid  
1177 precursor protein expression and processing are differentially regulated during cortical  
1178 neuron differentiation. *Sci Rep.* Nature Publishing Group; 2016;6: 29200.  
1179 doi:10.1038/srep29200
- 1180 34. Shakes LA, Du H, Wolf HM, Hatcher C, Norford DC, Precht P, et al. Using BAC  
1181 transgenesis in zebrafish to identify regulatory sequences of the amyloid precursor protein  
1182 gene in humans. *BMC Genomics.* 2012;13: 451. doi:10.1186/1471-2164-13-451
- 1183 35. Davis RP, Costa M, Grandela C, Holland AM, Hatzistavrou T, Micallef SJ, et al. A

- 1184 protocol for removal of antibiotic resistance cassettes from human embryonic stem cells  
1185 genetically modified by homologous recombination or transgenesis. *Nat Protoc.* 2008;3:  
1186 1550–1558. doi:10.1038/nprot.2008.146
- 1187 36. Israel MA, Goldstein LS. Capturing Alzheimer’s disease genomes with induced  
1188 pluripotent stem cells: prospects and challenges. *Genome Med.* 2011/08/27. 2011;3: 49.  
1189 doi:10.1186/gm265
- 1190 37. Muratore CR, Rice HC, Srikanth P, Callahan DG, Shin T, Benjamin LNP, et al. The  
1191 familial Alzheimer’s disease APPV717I mutation alters APP processing and Tau  
1192 expression in iPSC-derived neurons. *Hum Mol Genet.* 2014;23: 3523–3536.  
1193 doi:10.1093/hmg/ddu064
- 1194 38. van Helmond Z, Miners JS, Kehoe PG, Love S. Oligomeric A $\beta$  in Alzheimer’s Disease:  
1195 Relationship to Plaque and Tangle Pathology, APOE Genotype and Cerebral Amyloid  
1196 Angiopathy. *Brain Pathol.* 2010;20: 468–480. doi:10.1111/j.1750-3639.2009.00321.x
- 1197 39. Bharadwaj PR, Dubey AK, Masters CL, Martins RN, Macreadie IG. Abeta aggregation  
1198 and possible implications in Alzheimer’s disease pathogenesis. *J Cell Mol Med.* 2009;13:  
1199 412–421. Available:  
1200 [http://www.ncbi.nlm.nih.gov/entrez/query.fcgi?cmd=Retrieve&db=PubMed&dopt=Citati](http://www.ncbi.nlm.nih.gov/entrez/query.fcgi?cmd=Retrieve&db=PubMed&dopt=Citation&list_uids=19374683)  
1201 [on&list\\_uids=19374683](http://www.ncbi.nlm.nih.gov/entrez/query.fcgi?cmd=Retrieve&db=PubMed&dopt=Citation&list_uids=19374683)
- 1202 40. Forner S, Baglietto-Vargas D, Martini AC, Trujillo-Estrada L, LaFerla FM. Synaptic  
1203 Impairment in Alzheimer’s Disease: A Dysregulated Symphony. *Trends Neurosci.*  
1204 2017;40: 347–357. doi:10.1016/j.tins.2017.04.002
- 1205 41. Nixon RA. Amyloid precursor protein and endosomal-lysosomal dysfunction in  
1206 Alzheimer’s disease: inseparable partners in a multifactorial disease. *FASEB J.* 2017;31:  
1207 2729–2743. doi:10.1096/fj.201700359
- 1208 42. Nilsson P, Loganathan K, Sekiguchi M, Matsuba Y, Hui K, Tsubuki S, et al. A $\beta$  Secretion  
1209 and Plaque Formation Depend on Autophagy. *Cell Rep. The Authors;* 2013;7: 1–9.  
1210 doi:10.1016/j.celrep.2013.08.042
- 1211 43. Cataldo AM, Petanceska S, Terio NB, Peterhoff CM, Durham R, Mercken M, et al. Abeta  
1212 localization in abnormal endosomes: association with earliest Abeta elevations in AD and  
1213 Down syndrome. *Neurobiol Aging.* 2004/10/07. 2004;25: 1263–1272.  
1214 doi:10.1016/j.neurobiolaging.2004.02.027
- 1215 44. Poteryaev D, Datta S, Ackema K, Zerial M, Spang A. Identification of the switch in early-  
1216 to-late endosome transition. *Cell. Elsevier Ltd;* 2010;141: 497–508.  
1217 doi:10.1016/j.cell.2010.03.011
- 1218 45. Schluter OM. A Complete Genetic Analysis of Neuronal Rab3 Function. *J Neurosci.*  
1219 2004;24: 6629–6637. doi:10.1523/JNEUROSCI.1610-04.2004
- 1220 46. Boland B, Kumar A, Lee S, Platt FM, Wegiel J, Yu WH, et al. Autophagy Induction and  
1221 Autophagosome Clearance in Neurons: Relationship to Autophagic Pathology in  
1222 Alzheimer’s Disease. *J Neurosci.* 2008;28: 6926–6937. doi:10.1523/jneurosci.0800-  
1223 08.2008

- 1224 47. Haass C, Kaether C, Thinakaran G, Sisodia S. Trafficking and proteolytic processing of  
1225 APP. *Cold Spring Harb Perspect Med.* 2012;2: a006270.  
1226 doi:10.1101/cshperspect.a006270
- 1227 48. Grueninger F, Bohrmann B, Czech C, Ballard TM, Frey JR, Weidensteiner C, et al.  
1228 Phosphorylation of Tau at S422 is enhanced by A $\beta$  in TauPS2APP triple transgenic mice.  
1229 *Neurobiol Dis.* Elsevier Inc.; 2010;37: 294–306. doi:10.1016/j.nbd.2009.09.004
- 1230 49. Corder AEH, Saunders AM, Strittmatter WJ, Schmechel DE, Gaskell PC, Small W, et al.  
1231 Gene Dose of Apolipoprotein E Type 4 Allele and the Risk of Alzheimer ' s Disease in  
1232 Late Onset Families Published by : American Association for the Advancement of Science  
1233 Stable URL : <http://www.jstor.org/stable/2882127>. 2008;261: 921–923.
- 1234 50. Annese A, Manzari C, Lionetti C, Picardi E, Horner DS, Chiara M, et al. Whole  
1235 transcriptome profiling of Late-Onset Alzheimer's Disease patients provides insights into  
1236 the molecular changes involved in the disease. *Sci Rep.* 2018;8: 4282.  
1237 doi:10.1038/s41598-018-22701-2
- 1238 51. Blalock EM, Geddes JW, Chen KC, Porter NM, Markesbery WR, Landfield PW. Incipient  
1239 Alzheimer's disease: Microarray correlation analyses reveal major transcriptional and  
1240 tumor suppressor responses. *Proc Natl Acad Sci.* 2004;101: 2173–2178.  
1241 doi:10.1073/pnas.0308512100
- 1242 52. Zhang B, Gaiteri C, Bodea L-G, Wang Z, McElwee J, Podtelezchnikov AA, et al.  
1243 Integrated systems approach identifies genetic nodes and networks in late-onset  
1244 Alzheimer's disease. *Cell.* Elsevier Inc.; 2013;153: 707–20.  
1245 doi:10.1016/j.cell.2013.03.030
- 1246 53. Guemez-Gamboa A, Coufal NG, Gleeson JG. Primary Cilia in the Developing and Mature  
1247 Brain. *Neuron.* Elsevier; 2014;82: 511–521. doi:10.1016/j.neuron.2014.04.024
- 1248 54. Yamin R, Malgeri EG, Sloane J a, Mcgraw WT, Abraham CR. Metalloendopeptidase EC  
1249 3 . 4 . 24 . 15 Is Necessary for Alzheimer ' s Amyloid-  $\beta$  Peptide Degradation \*.  
1250 *Biochemistry.* 1999;
- 1251 55. Pollio G, Hoozemans JJM, Andersen CA, Roncarati R, Rosi MC, van Haastert ES, et al.  
1252 Increased expression of the oligopeptidase THOP1 is a neuroprotective response to A $\beta$   
1253 toxicity. *Neurobiol Dis.* 2008;31: 145–158. doi:10.1016/j.nbd.2008.04.004
- 1254 56. Saghatelian A, Jessani N, Joseph A, Humphrey M, Cravatt BF. Activity-based probes for  
1255 the proteomic profiling of metalloproteases. *Proc Natl Acad Sci.* 2004;101: 10000–10005.  
1256 doi:10.1073/pnas.0402784101
- 1257 57. Abraham CR, Selkoe DJ, Potter H. Immunochemical identification of the serine protease  
1258 inhibitor  $\alpha$ 1-antichymotrypsin in the brain amyloid deposits of Alzheimer's disease. *Cell.*  
1259 1988;52: 487–501. doi:10.1016/0092-8674(88)90462-X
- 1260 58. Freude K, Pires C, Hyttel P, Hall V. Induced Pluripotent Stem Cells Derived from  
1261 Alzheimer's Disease Patients: The Promise, the Hope and the Path Ahead. *J Clin Med.*  
1262 2014;3: 1402–1436. doi:10.3390/jcm3041402



- 1263 59. Young JE, Goldstein LSB. Alzheimer's disease in a dish: promises and challenges of  
1264 human stem cell models. *Hum Mol Genet.* 2012;21: R82–R89. doi:10.1093/hmg/dds319
- 1265 60. Arber C, Lovejoy C, Wray S. Stem cell models of Alzheimer's disease: progress and  
1266 challenges. *Alzheimers Res Ther. Alzheimer's Research & Therapy;* 2017;9: 42.  
1267 doi:10.1186/s13195-017-0268-4
- 1268 61. Müller UC, Deller T, Korte M. Not just amyloid: physiological functions of the amyloid  
1269 precursor protein family. *Nat Rev Neurosci.* Nature Publishing Group; 2017;18: 281–298.  
1270 doi:10.1038/nrn.2017.29
- 1271 62. Tanzi RE. The genetics of Alzheimer disease. *Cold Spring Harb Perspect Med.* 2012;2: 1–  
1272 10. doi:10.1101/cshperspect.a006296
- 1273 63. Herrup K. The case for rejecting the amyloid cascade hypothesis. *Nat Neurosci.* 2015;18:  
1274 794–799. doi:10.1038/nn.4017
- 1275 64. Gouras GK, Tampellini D, Takahashi RH, Capetillo-Zarate E. Intraneuronal  $\beta$ -amyloid  
1276 accumulation and synapse pathology in Alzheimer's disease. *Acta Neuropathol.* 2010;119:  
1277 523–541. doi:10.1007/s00401-010-0679-9
- 1278 65. Lopez-Toledano MA. Neurogenic Effect of  $\beta$ -Amyloid Peptide in the Development of  
1279 Neural Stem Cells. *J Neurosci.* 2004;24: 5439–5444. doi:10.1523/JNEUROSCI.0974-  
1280 04.2004
- 1281 66. Hu X, Crick SL, Bu G, Frieden C, Pappu R V, Lee J-M. Amyloid seeds formed by cellular  
1282 uptake, concentration, and aggregation of the amyloid-beta peptide. *Proc Natl Acad Sci U*  
1283 *S A.* 2009;106: 20324–9. doi:10.1073/pnas.0911281106
- 1284 67. Gouras GK, Almeida CG, Takahashi RH. Intraneuronal A $\beta$  accumulation and origin of  
1285 plaques in Alzheimer's disease. *Neurobiol Aging.* 2005;26: 1235–1244. Available:  
1286 [http://www.ncbi.nlm.nih.gov/entrez/query.fcgi?cmd=Retrieve&db=PubMed&dopt=Citation&list\\_uids=16023263](http://www.ncbi.nlm.nih.gov/entrez/query.fcgi?cmd=Retrieve&db=PubMed&dopt=Citation&list_uids=16023263)  
1287
- 1288 68. Galluzzi L, Vitale I, Aaronson SA, Abrams JM, Adam D, Agostinis P, et al. Molecular  
1289 mechanisms of cell death: recommendations of the Nomenclature Committee on Cell  
1290 Death 2018. *Cell Death Differ.* 2018;25: 486–541. doi:10.1038/s41418-017-0012-4
- 1291 69. Ghavami S, Shojaei S, Yeganeh B, Ande SR, Jangamreddy JR, Mehrpour M, et al.  
1292 Autophagy and apoptosis dysfunction in neurodegenerative disorders. *Prog Neurobiol.*  
1293 Elsevier Ltd; 2014;112: 24–49. doi:10.1016/j.pneurobio.2013.10.004
- 1294 70. Zhang Y, McLaughlin R, Goodyer C, LeBlanc A. Selective cytotoxicity of intracellular  
1295 amyloid  $\beta$  peptide 1–42 through p53 and Bax in cultured primary human neurons. *J Cell*  
1296 *Biol.* 2002;156: 519–529. doi:10.1083/jcb.200110119
- 1297 71. Moore BD, Martin J, de Mena L, Sanchez J, Cruz PE, Ceballos-Diaz C, et al. Short A $\beta$   
1298 peptides attenuate A $\beta$ 42 toxicity in vivo. *J Exp Med.* 2018;215: 283–301.  
1299 doi:10.1084/jem.20170600
- 1300 72. Espuny-Camacho I, Arranz AM, Fiers M, Snellinx A, Ando K, Munck S, et al. Hallmarks  
1301 of Alzheimer's Disease in Stem-Cell-Derived Human Neurons Transplanted into Mouse

- 1302 Brain. Neuron. 2017;93: 1066–1081.e8. doi:10.1016/j.neuron.2017.02.001
- 1303 73. Haass C, Selkoe DJ. Soluble protein oligomers in neurodegeneration: lessons from the  
1304 Alzheimer's amyloid beta-peptide. Nat Rev Mol Cell Biol. 2007;8: 101–12.  
1305 doi:10.1038/nrm2101
- 1306 74. Wicklund L, Leão RN, Strömberg A-M, Mousavi M, Hovatta O, Nordberg A, et al. B-  
1307 Amyloid 1-42 Oligomers Impair Function of Human Embryonic Stem Cell-Derived  
1308 Forebrain Cholinergic Neurons. PLoS One. 2010;5: e15600.  
1309 doi:10.1371/journal.pone.0015600
- 1310 75. Engel M, Do-Ha D, Muñoz SS, Ooi L. Common pitfalls of stem cell differentiation: a  
1311 guide to improving protocols for neurodegenerative disease models and research. Cell Mol  
1312 Life Sci. 2016;73: 3693–3709. doi:10.1007/s00018-016-2265-3
- 1313 76. Muratore CR, Zhou C, Liao M, Fernandez MA, Taylor WM, Lagomarsino VN, et al. Cell-  
1314 type Dependent Alzheimer's Disease Phenotypes: Probing the Biology of Selective  
1315 Neuronal Vulnerability. Stem Cell Reports. ElsevierCompany.; 2017;9: 1868–1884.  
1316 doi:10.1016/j.stemcr.2017.10.015
- 1317 77. Moore S, Evans LDB, Andersson T, Portelius E, Smith J, Dias TB, et al. APP Metabolism  
1318 Regulates Tau Proteostasis in Human Cerebral Cortex Neurons. Cell Rep. Elsevier;  
1319 2015;11: 689–696. doi:10.1016/j.celrep.2015.03.068
- 1320 78. Shi Y, Kirwan P, Smith J, MacLean G, Orkin SH, Livesey FJ. A human stem cell model  
1321 of early Alzheimer's disease pathology in Down syndrome. Sci Transl Med. 2012/02/22.  
1322 2012;4: 124ra29-124ra29. doi:10.1126/scitranslmed.3003771
- 1323 79. Mahley RW, Huang Y. Apolipoprotein E Sets the Stage: Response to Injury Triggers  
1324 Neuropathology. Neuron. 2012;76: 871–885. doi:10.1016/j.neuron.2012.11.020
- 1325 80. Efthymiou AG, Goate AM. Late onset Alzheimer's disease genetics implicates microglial  
1326 pathways in disease risk. Mol Neurodegener. Molecular Neurodegeneration; 2017;12: 43.  
1327 doi:10.1186/s13024-017-0184-x
- 1328 81. Wyss-Coray T, Loike JD, Brionne TC, Lu E, Anankov R, Yan F, et al. Adult mouse  
1329 astrocytes degrade amyloid- $\beta$  in vitro and in situ. Nat Med. 2003;9: 453–457.  
1330 doi:10.1038/nm838
- 1331 82. Huang Y. A $\beta$ -independent roles of apolipoprotein E4 in the pathogenesis of Alzheimer's  
1332 disease. Trends Mol Med. Elsevier Ltd; 2010;16: 287–294.  
1333 doi:10.1016/j.molmed.2010.04.004
- 1334 83. Dafnis I, Stratikos E, Tzinia A, Tsilibary EC, Zannis VI, Chroni A. An apolipoprotein E4  
1335 fragment can promote intracellular accumulation of amyloid peptide beta 42. J  
1336 Neurochem. 2010;115: 873–884. doi:10.1111/j.1471-4159.2010.06756.x
- 1337 84. Kanekiyo T, Cirrito JR, Liu C-C, Shinohara M, Li J, Schuler DR, et al. Neuronal  
1338 Clearance of Amyloid- by Endocytic Receptor LRP1. J Neurosci. 2013;33: 19276–19283.  
1339 doi:10.1523/JNEUROSCI.3487-13.2013
- 1340 85. Wang C, Najm R, Xu Q, Jeong DE, Walker D, Balestra ME, et al. Gain of toxic

- 1341 apolipoprotein E4 effects in human iPSC-derived neurons is ameliorated by a small-  
1342 molecule structure corrector article. *Nat Med.* Springer US; 2018;24: 647–657.  
1343 doi:10.1038/s41591-018-0004-z
- 1344 86. Lin Y-T, Seo J, Gao F, Feldman HM, Wen H-L, Penney J, et al. APOE4 Causes  
1345 Widespread Molecular and Cellular Alterations Associated with Alzheimer’s Disease  
1346 Phenotypes in Human iPSC-Derived Brain Cell Types. *Neuron.* Elsevier Inc.; 2018; 1–14.  
1347 doi:10.1016/j.neuron.2018.05.008
- 1348 87. Castillo E, Leon J, Mazzei G, Abolhassani N, Haruyama N, Saito T, et al. Comparative  
1349 profiling of cortical gene expression in Alzheimer’s disease patients and mouse models  
1350 demonstrates a link between amyloidosis and neuroinflammation. *Sci Rep.* 2017;7: 17762.  
1351 doi:10.1038/s41598-017-17999-3
- 1352 88. Allen M, Carrasquillo MM, Funk C, Heavner BD, Zou F, Younkin CS, et al. Human  
1353 whole genome genotype and transcriptome data for Alzheimer’s and other  
1354 neurodegenerative diseases. *Sci Data.* 2016;3: 160089. doi:10.1038/sdata.2016.89
- 1355 89. Berbari NF, O’Connor AK, Haycraft CJ, Yoder BK. The Primary Cilium as a Complex  
1356 Signaling Center. *Curr Biol.* Elsevier Ltd; 2009;19: R526–R535.  
1357 doi:10.1016/j.cub.2009.05.025
- 1358 90. Cao L, Schrank BR, Rodriguez S, Benz EG, Moulia TW, Rickenbacher GT, et al. A $\beta$   
1359 alters the connectivity of olfactory neurons in the absence of amyloid plaques in vivo. *Nat*  
1360 *Commun.* Nature Publishing Group; 2012;3: 1009. doi:10.1038/ncomms2013
- 1361 91. Houlden H, Johnson J, Gardner-Thorpe C, Lashley T, Hernandez D, Worth P, et al.  
1362 Mutations in TTBK2, encoding a kinase implicated in tau phosphorylation, segregate with  
1363 spinocerebellar ataxia type 11. *Nat Genet.* 2007;39: 1434–1436. doi:10.1038/ng.2007.43
- 1364 92. Lee JH, Gleeson JG. The role of primary cilia in neuronal function. *Neurobiol Dis.*  
1365 Elsevier Inc.; 2010;38: 167–172. doi:10.1016/j.nbd.2009.12.022
- 1366 93. Berbari NF, Malarkey EB, Yazdi SMZR, McNair AD, Kippe JM, Croyle MJ, et al.  
1367 Hippocampal and Cortical Primary Cilia Are Required for Aversive Memory in Mice.  
1368 Kavushansky A, editor. *PLoS One.* 2014;9: e106576. doi:10.1371/journal.pone.0106576
- 1369 94. Nechipurenko I V., Doroquez DB, Sengupta P. Primary cilia and dendritic spines:  
1370 Different but similar signaling compartments. *Mol Cells.* 2013;36: 288–303.  
1371 doi:10.1007/s10059-013-0246-z
- 1372 95. Cummings J, Aisen PS, DuBois B, Frölich L, Jack CR, Jones RW, et al. Drug  
1373 development in Alzheimer’s disease: the path to 2025. *Alzheimer’s Res Ther.* Alzheimer’s  
1374 Research & Therapy; 2016;8: 39. doi:10.1186/s13195-016-0207-9
- 1375 96. Katsnelson A, De Strooper B, Zoghbi HY. Neurodegeneration: From cellular concepts to  
1376 clinical applications. *Sci Transl Med.* 2016;8: 1–6. doi:10.1126/scitranslmed.aal2074
- 1377

1378 [Competing interests](#)

1379 The authors declare no competing interests or conflicts.

1380 [Availability of materials](#)

1381 The cell lines generated in this study will be made freely available to qualified investigators

1382 subject to completing a City of Hope Material Transfer Agreement.

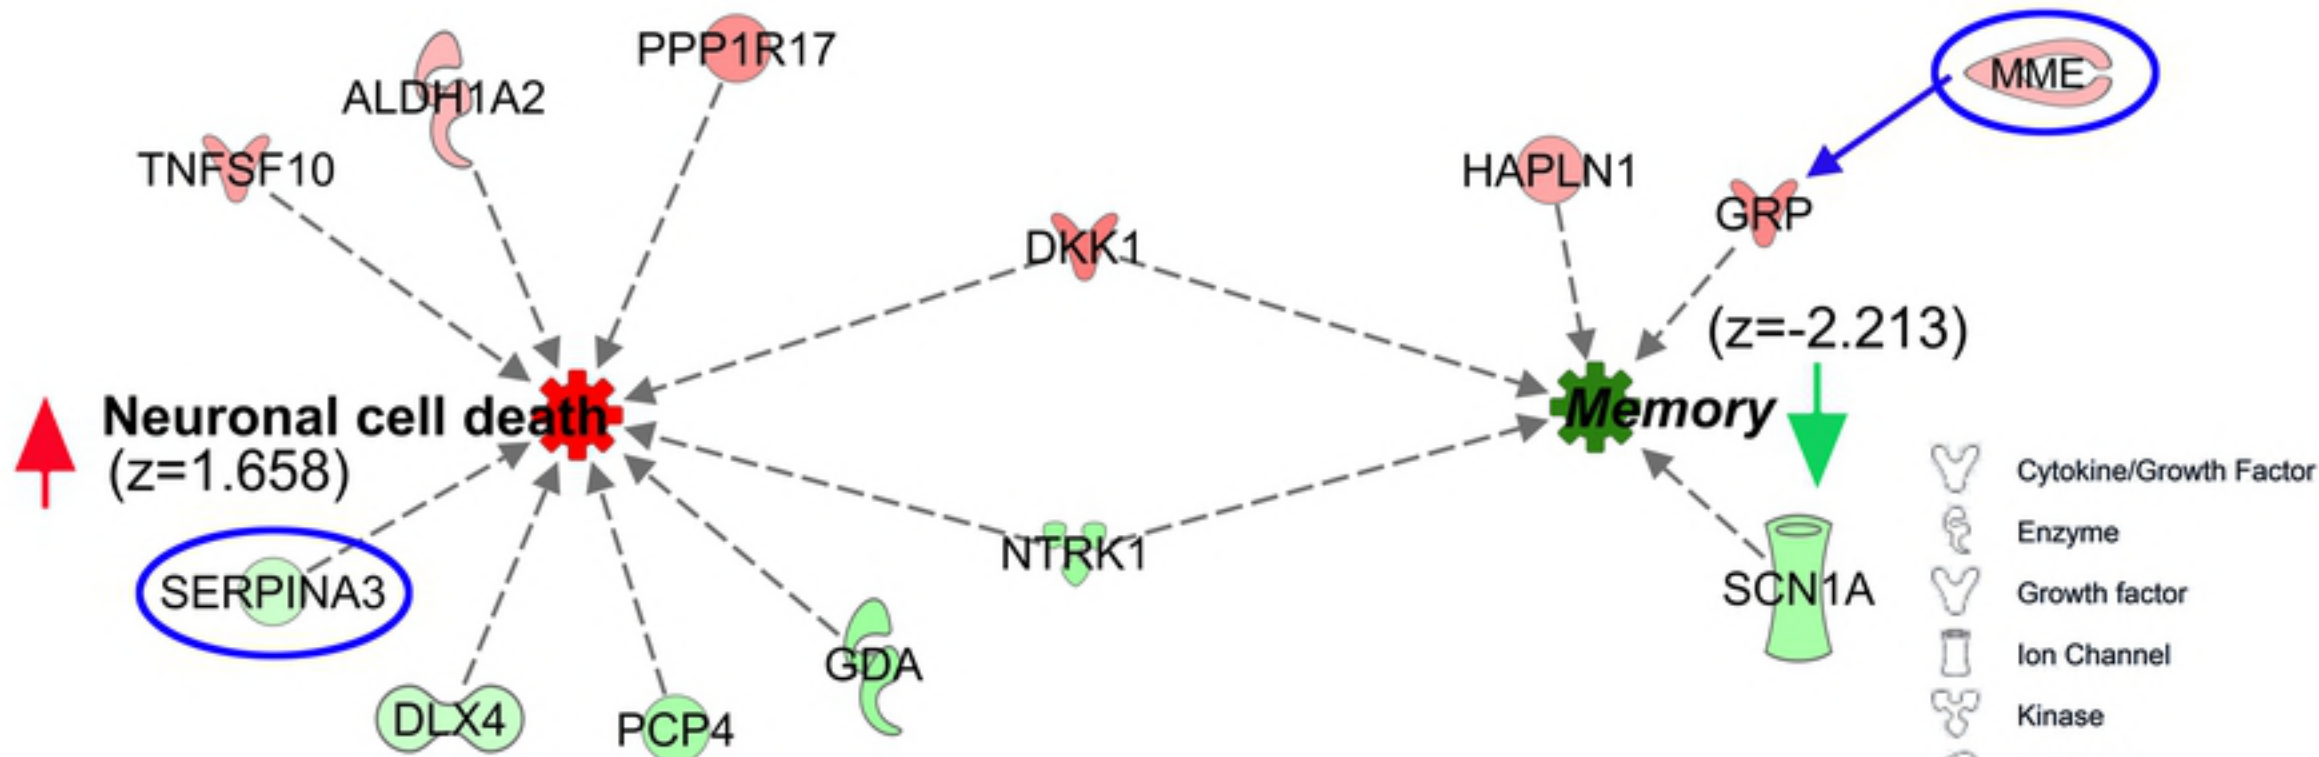

## Neuroprotective role of THOP1 in AD

MME(NEP) and SERPINA3(ACT)

A $\beta$ 42 vs H9,  $p=9.95 \text{ E-}03$ , Overlap 5% (2/40)

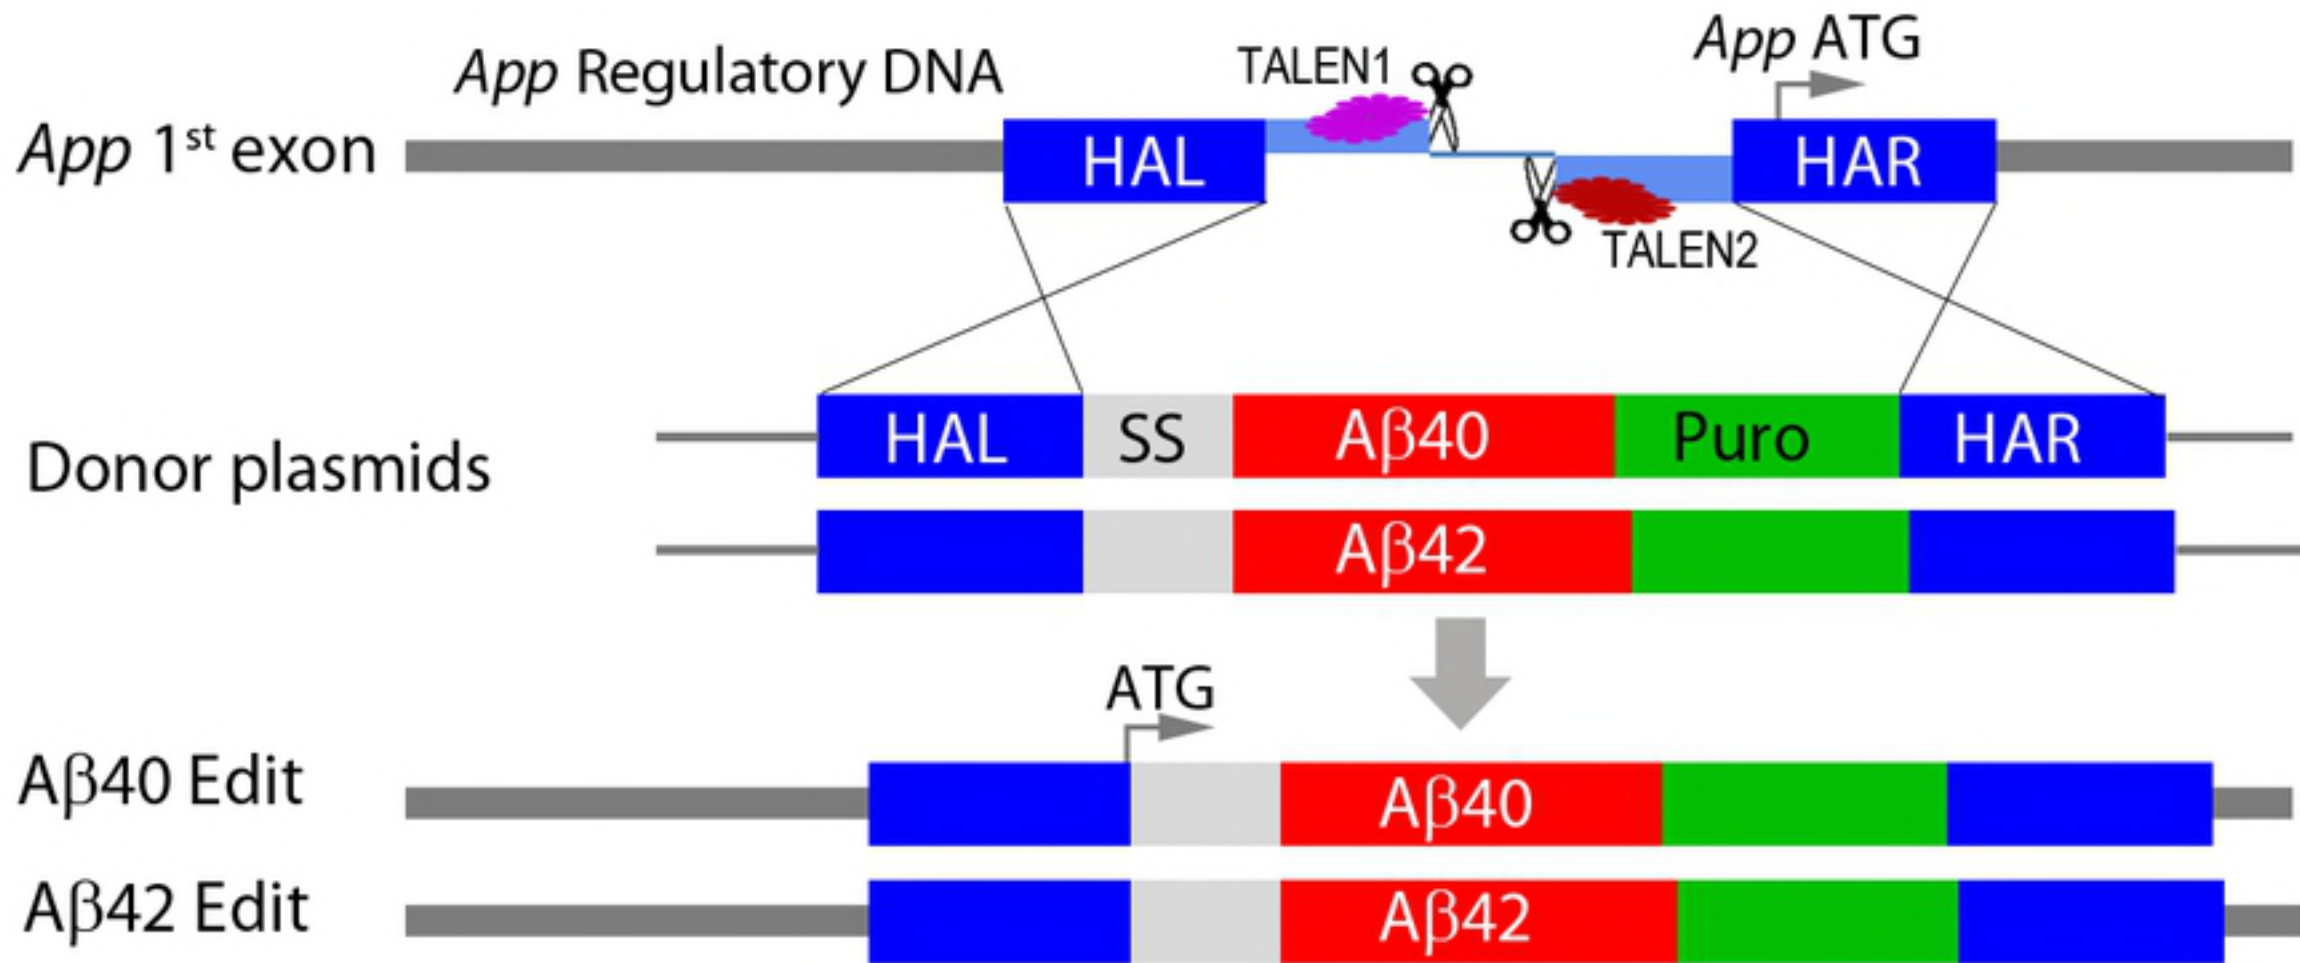

**A**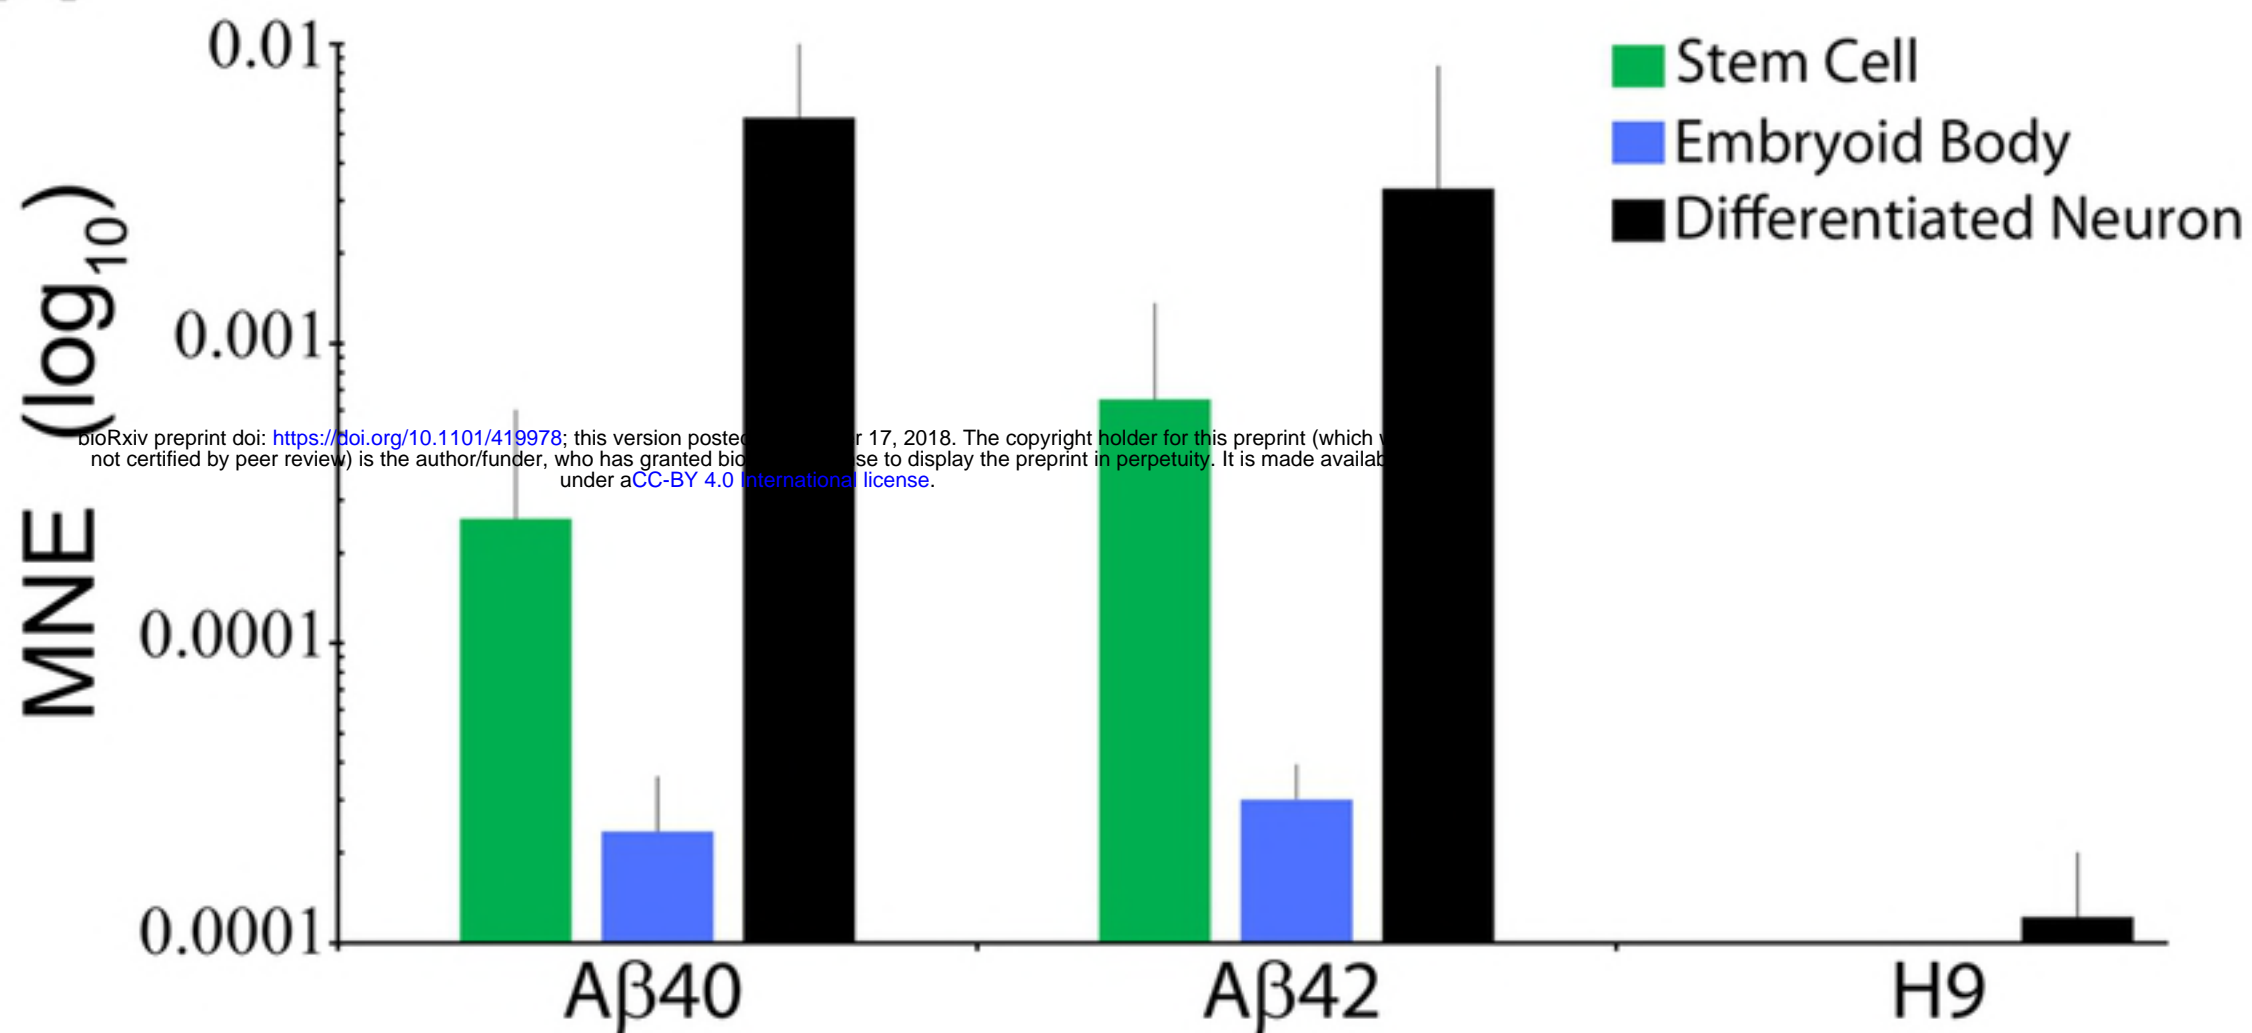**B**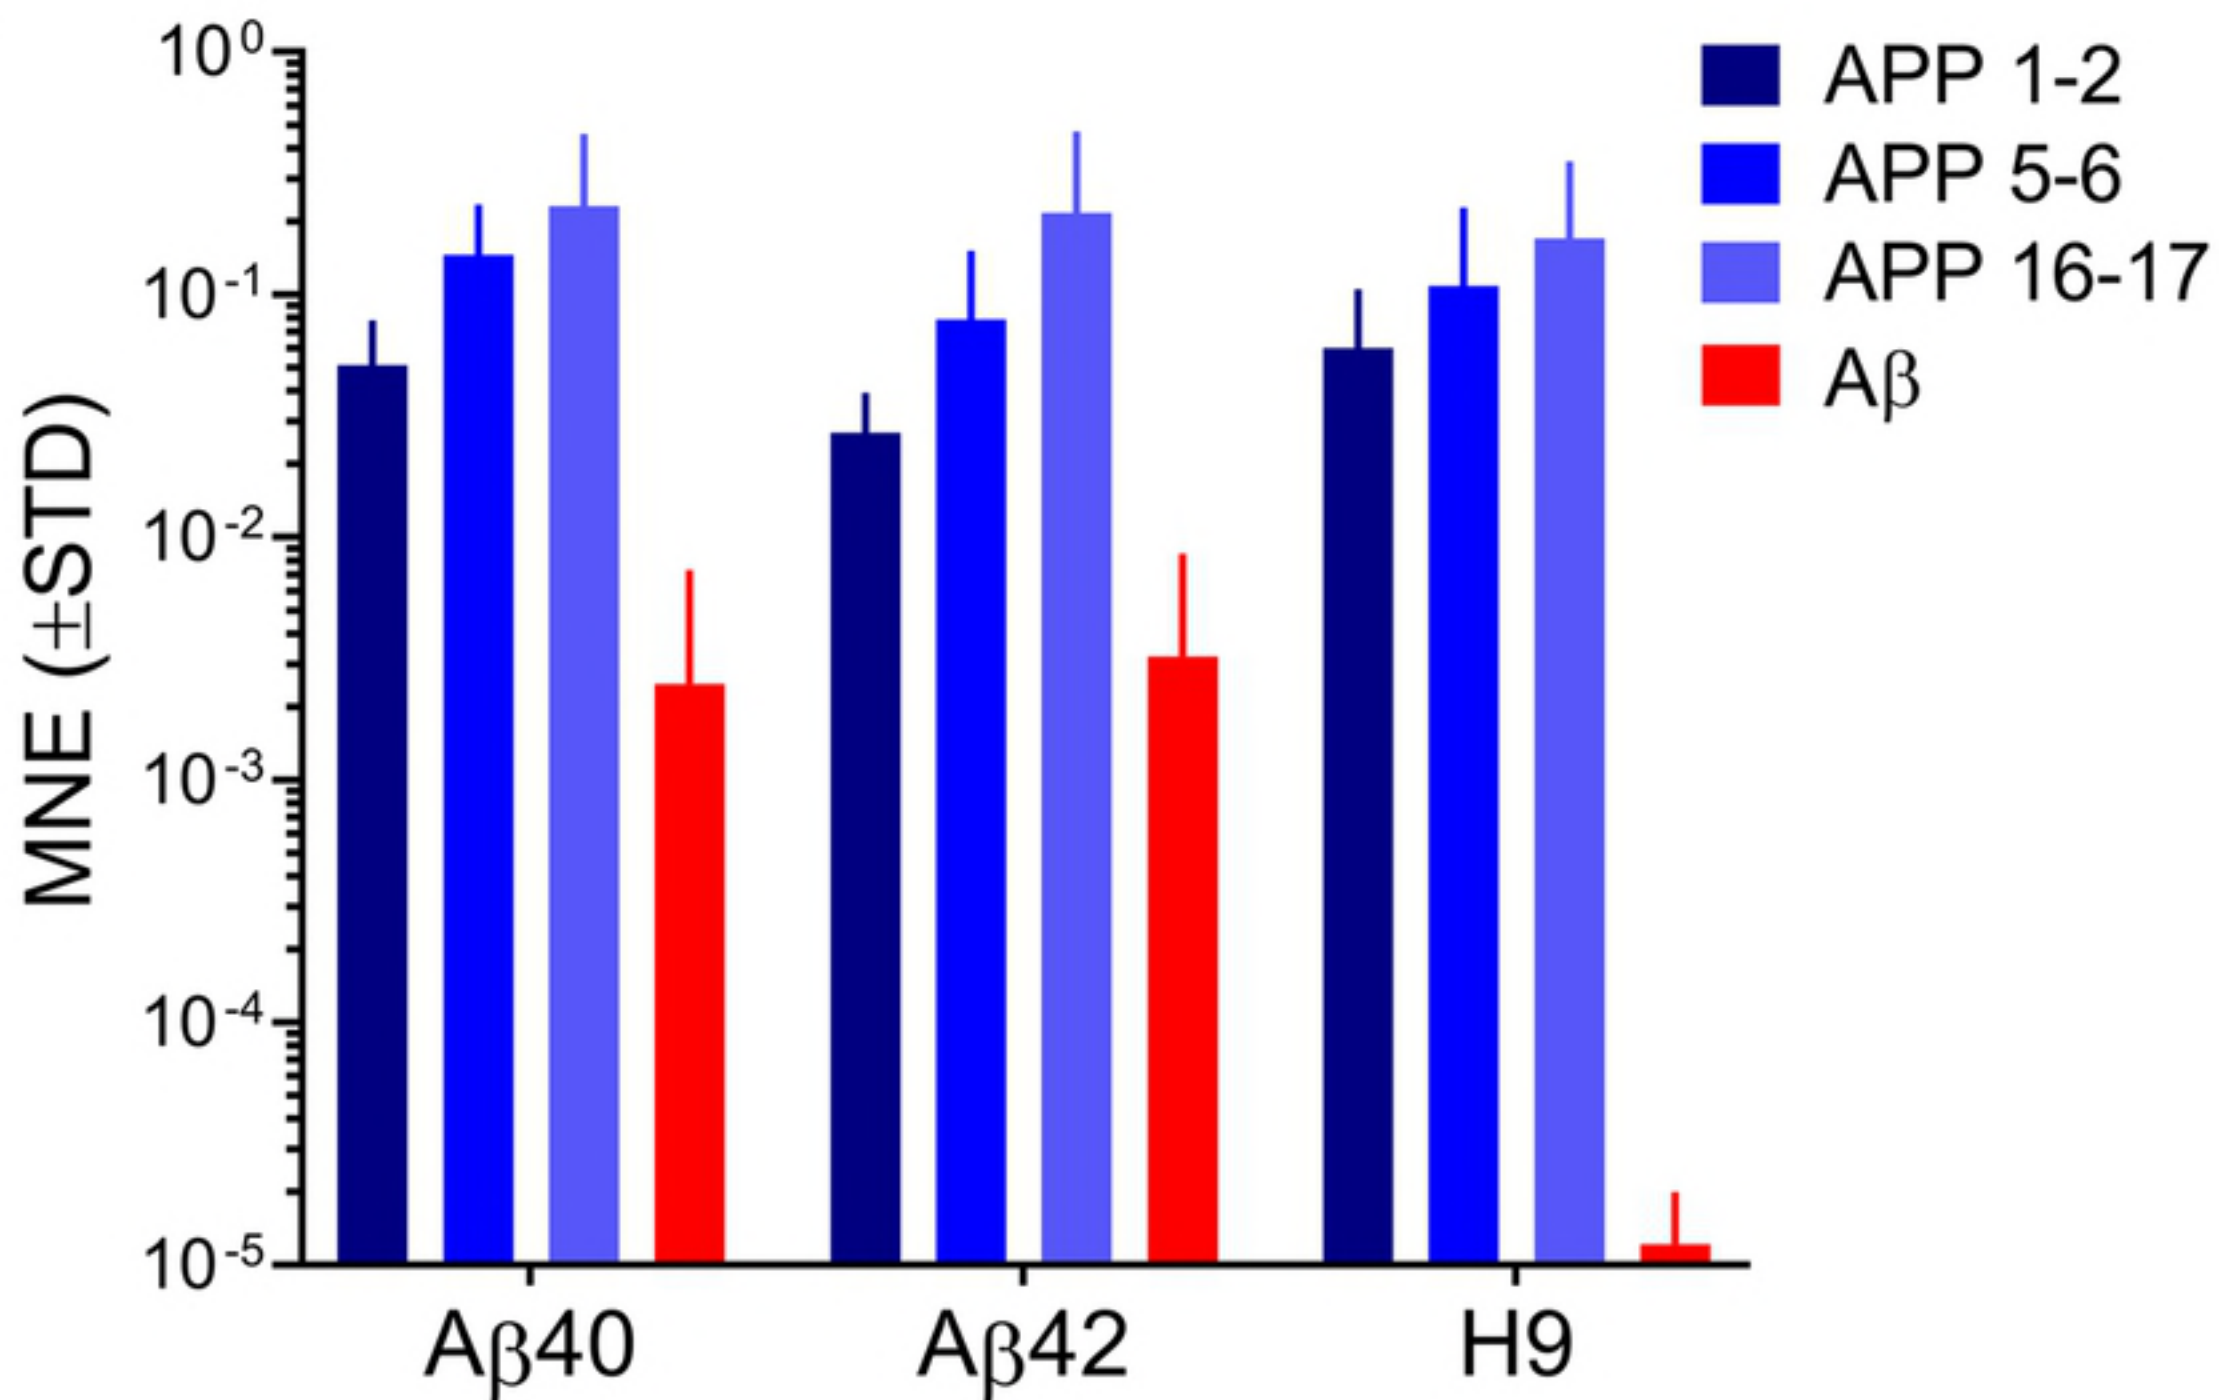

DAPI

DCX

NeuN

Merge

H9

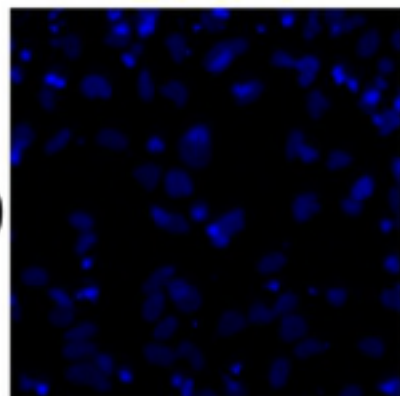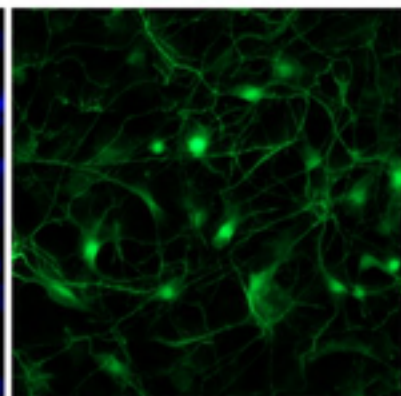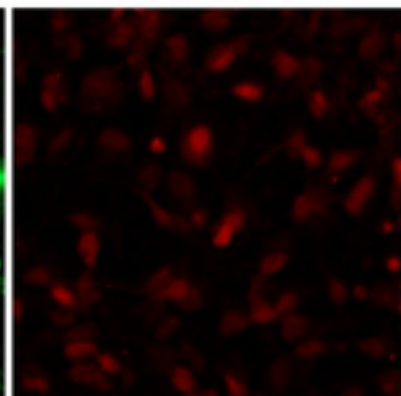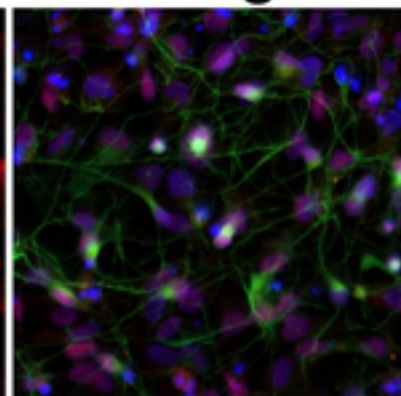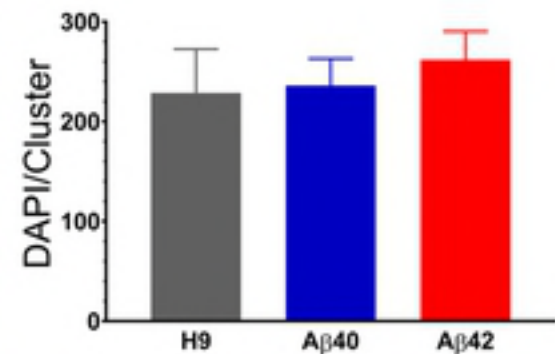A $\beta$ 40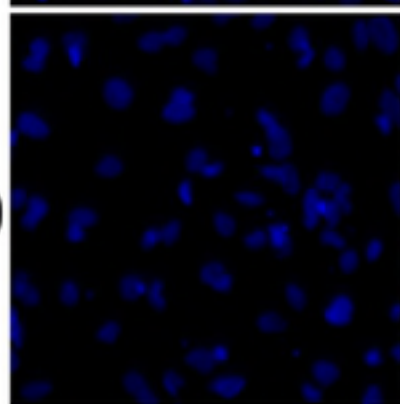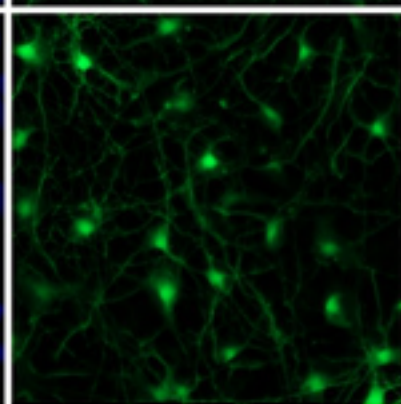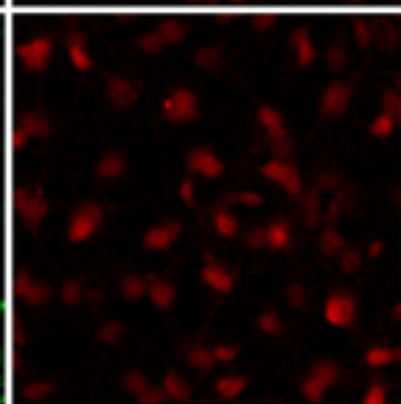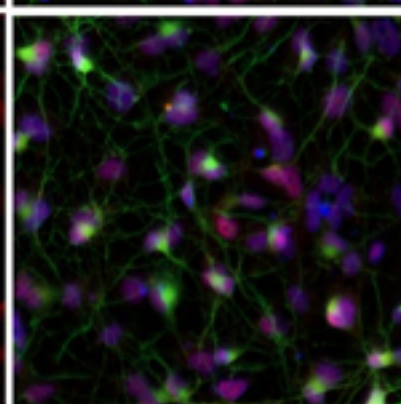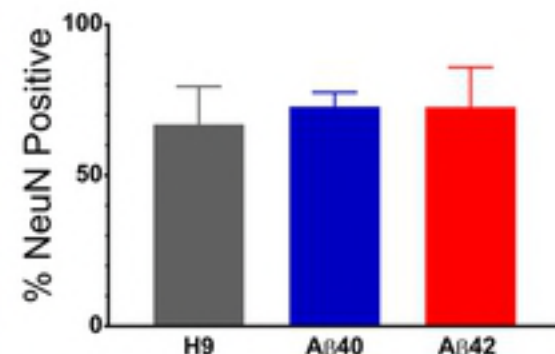A $\beta$ 42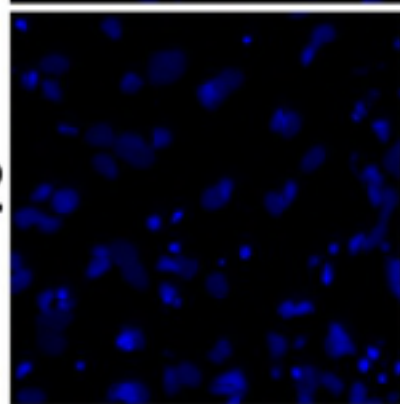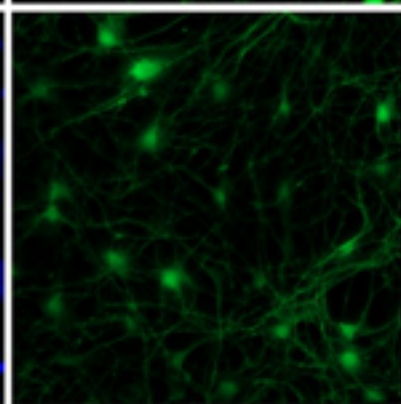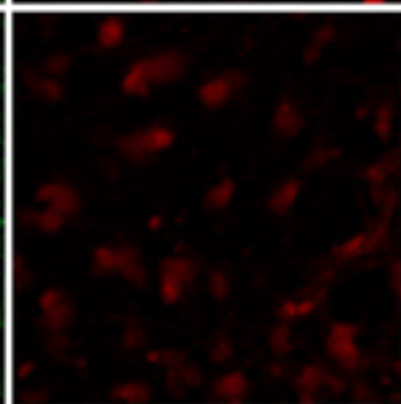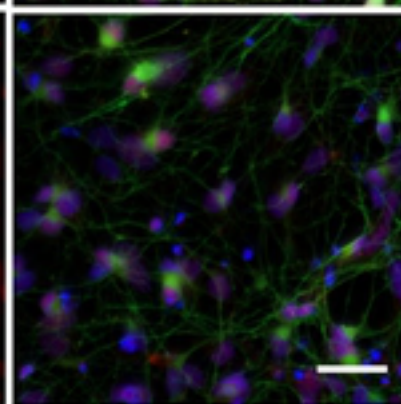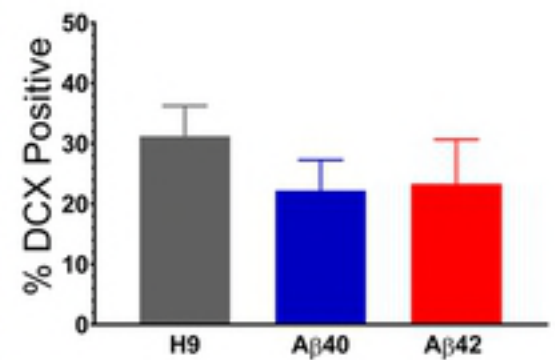



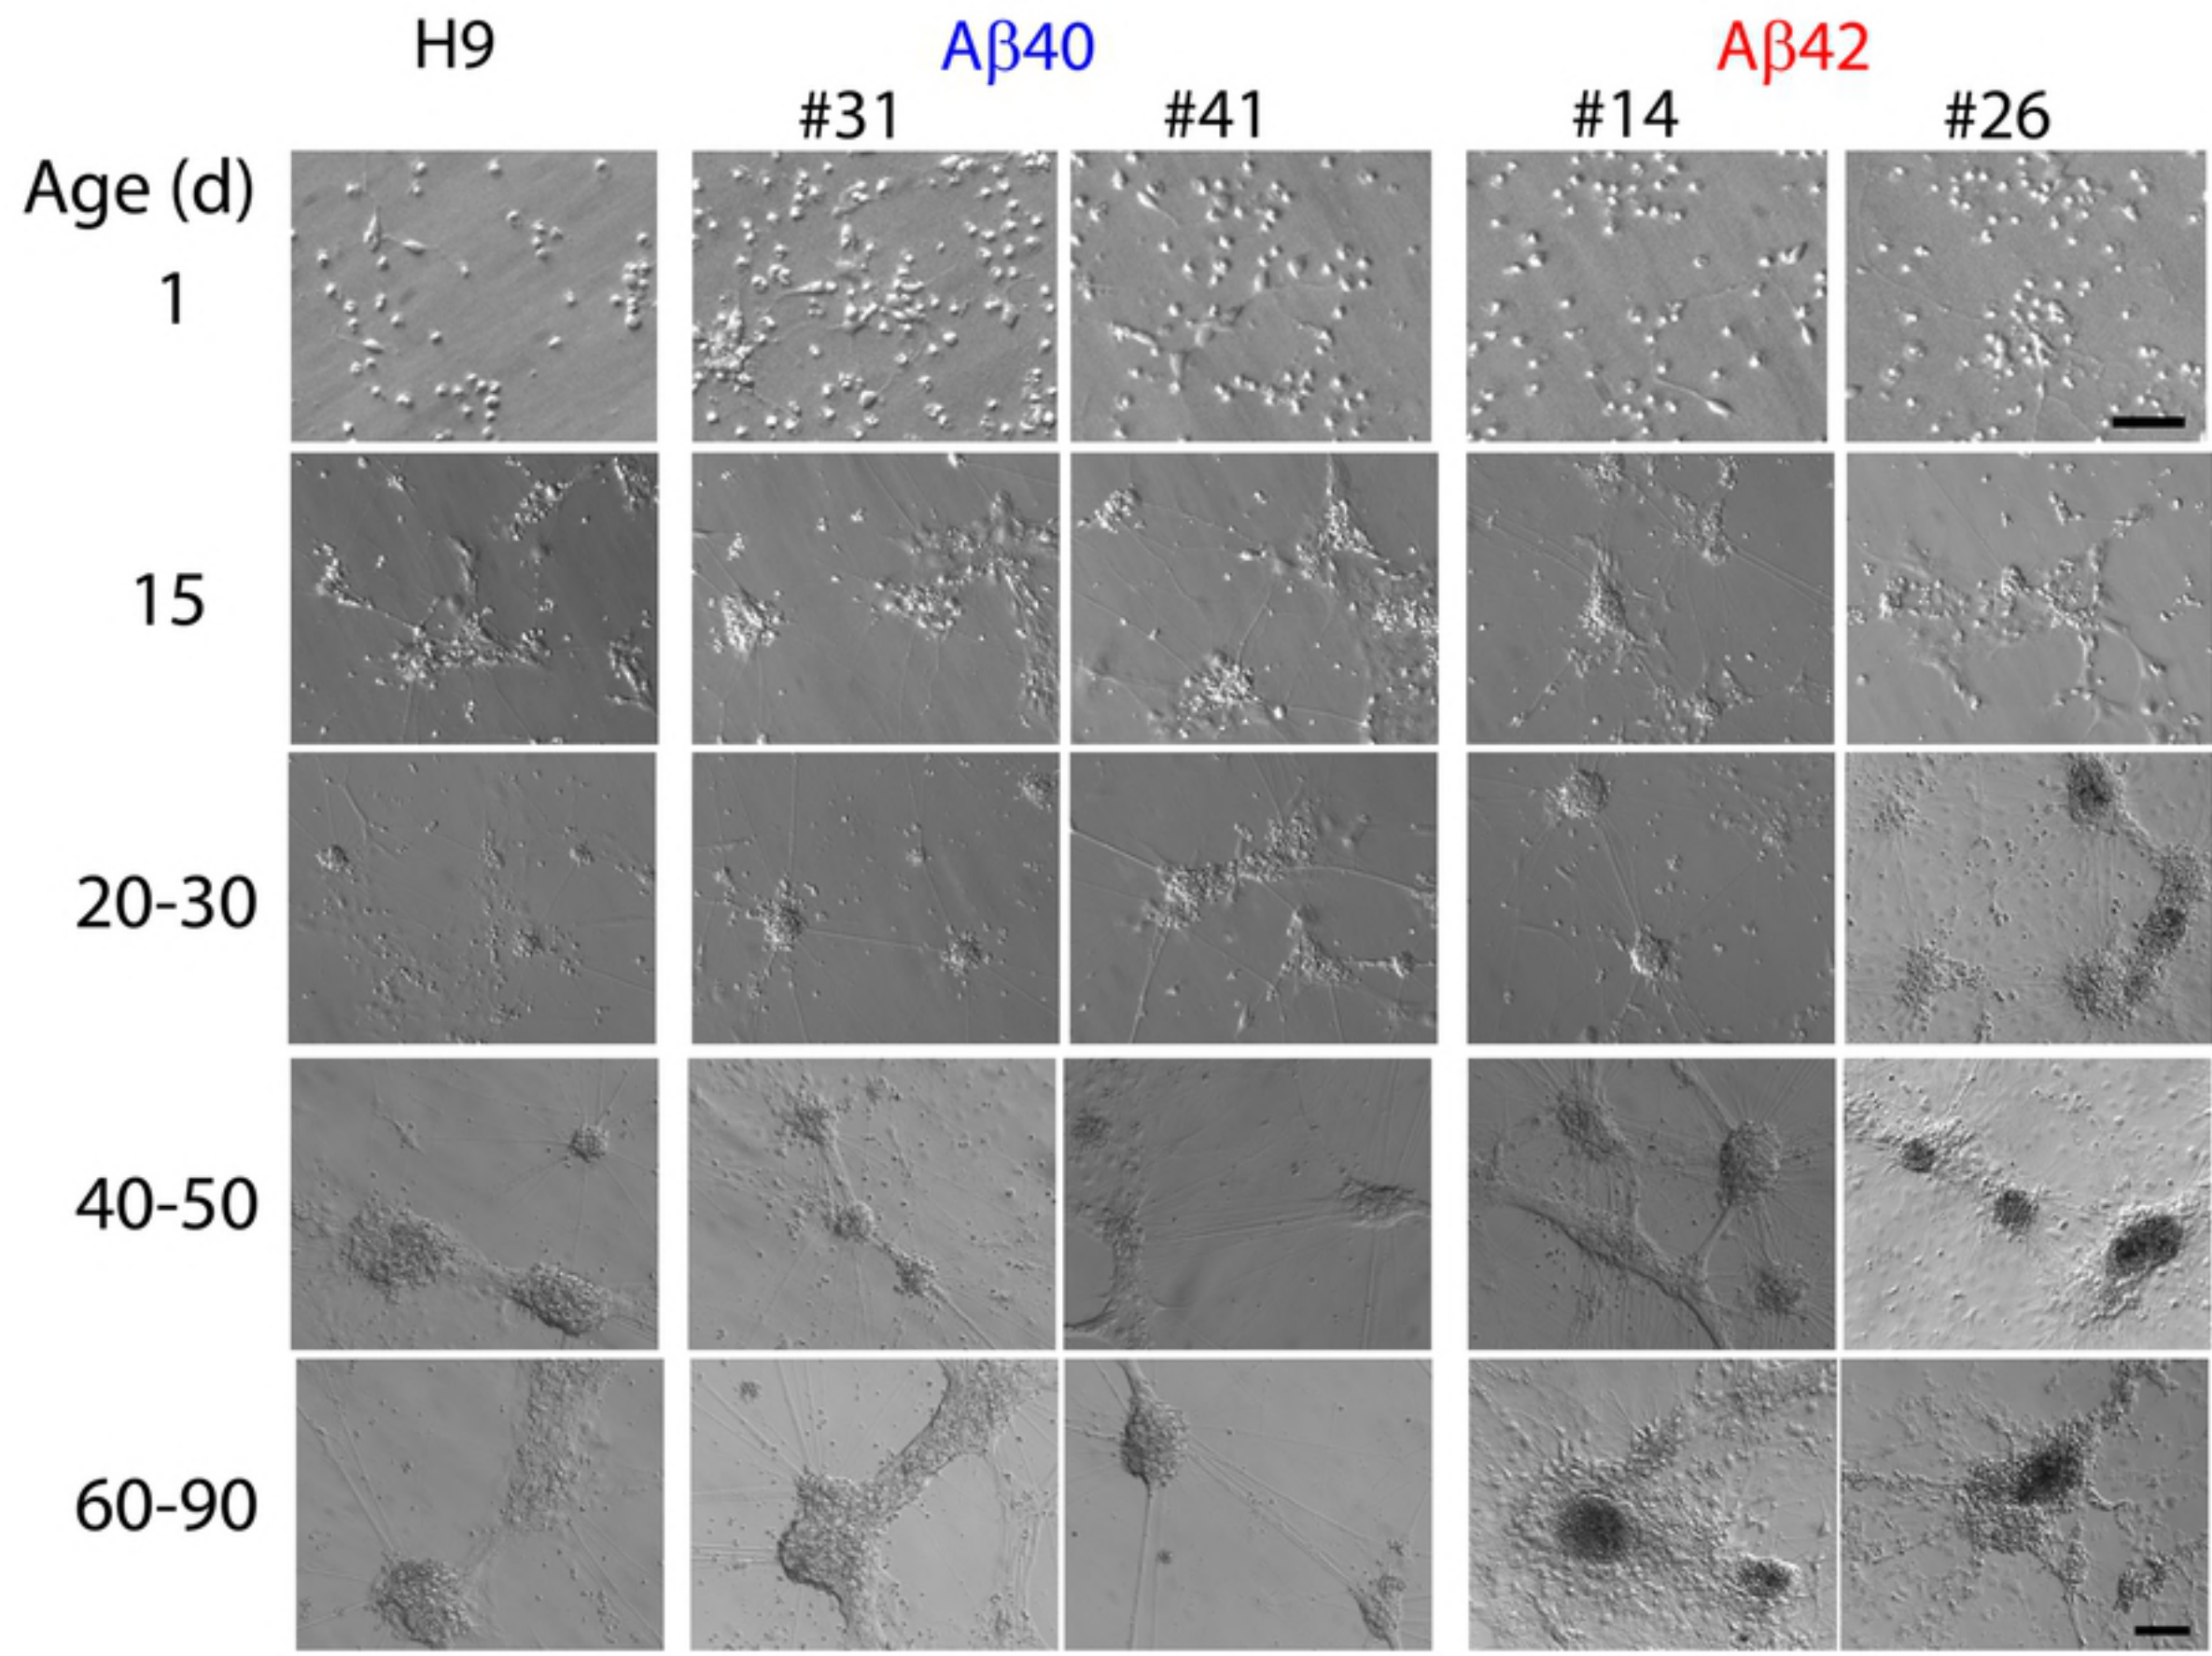

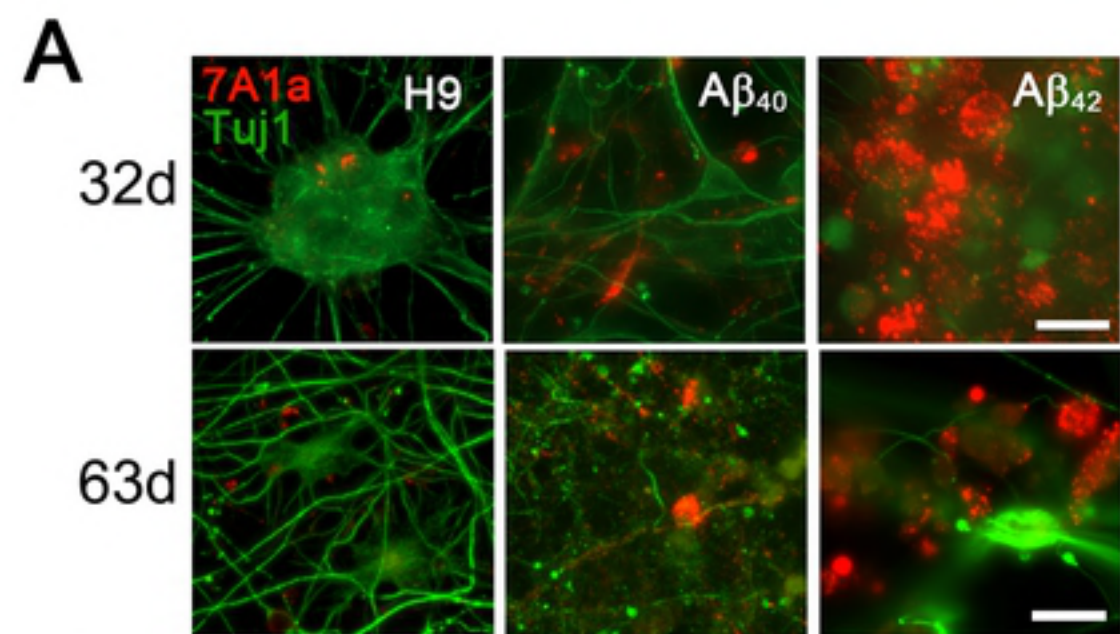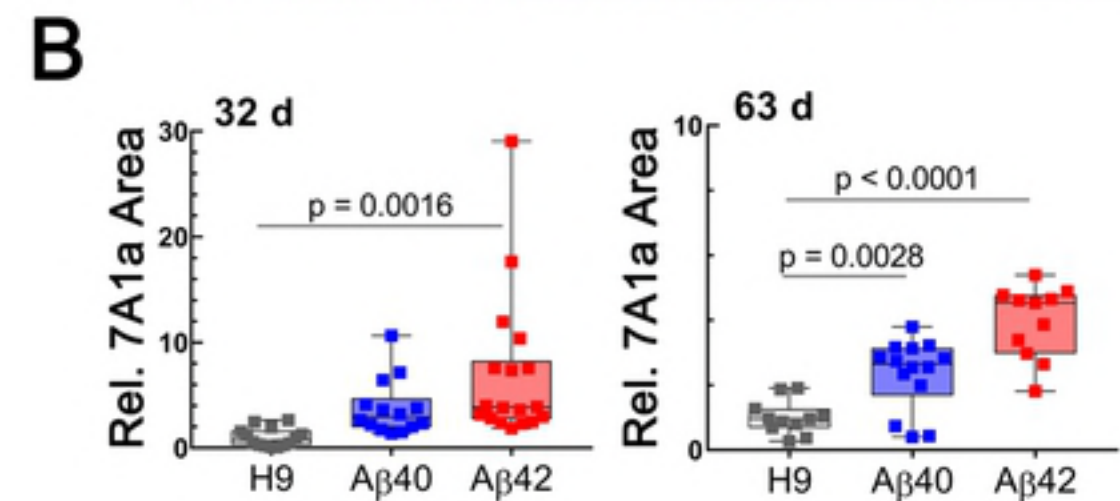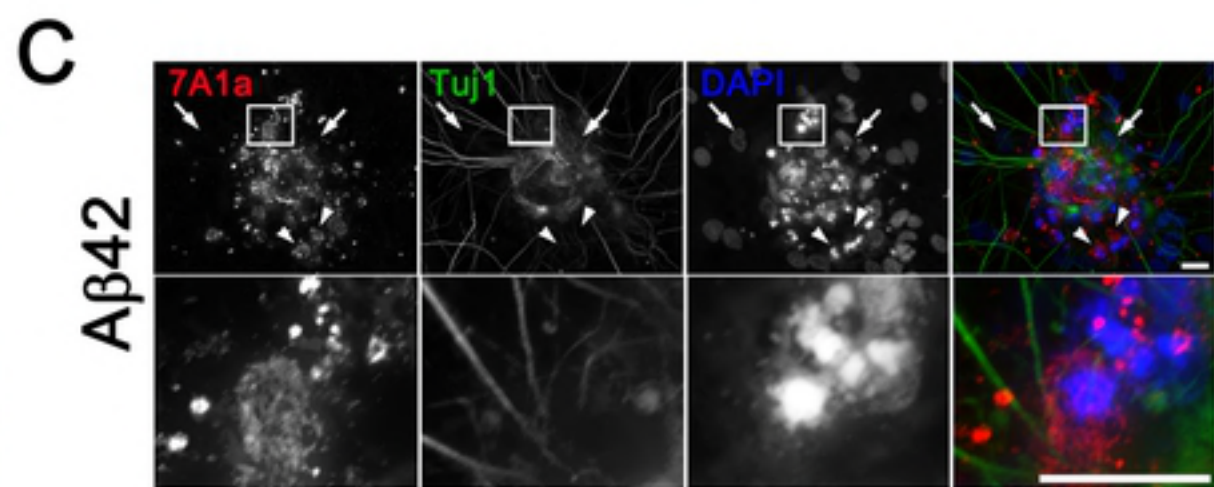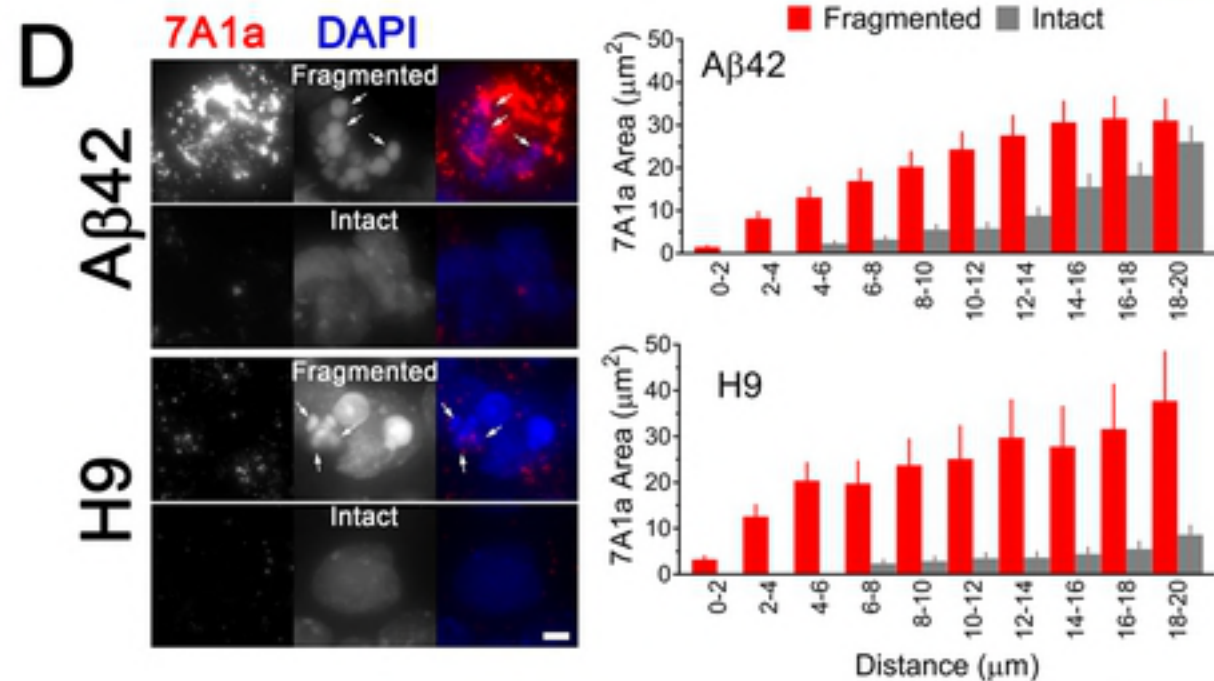

Syn1 NeuN DAPI

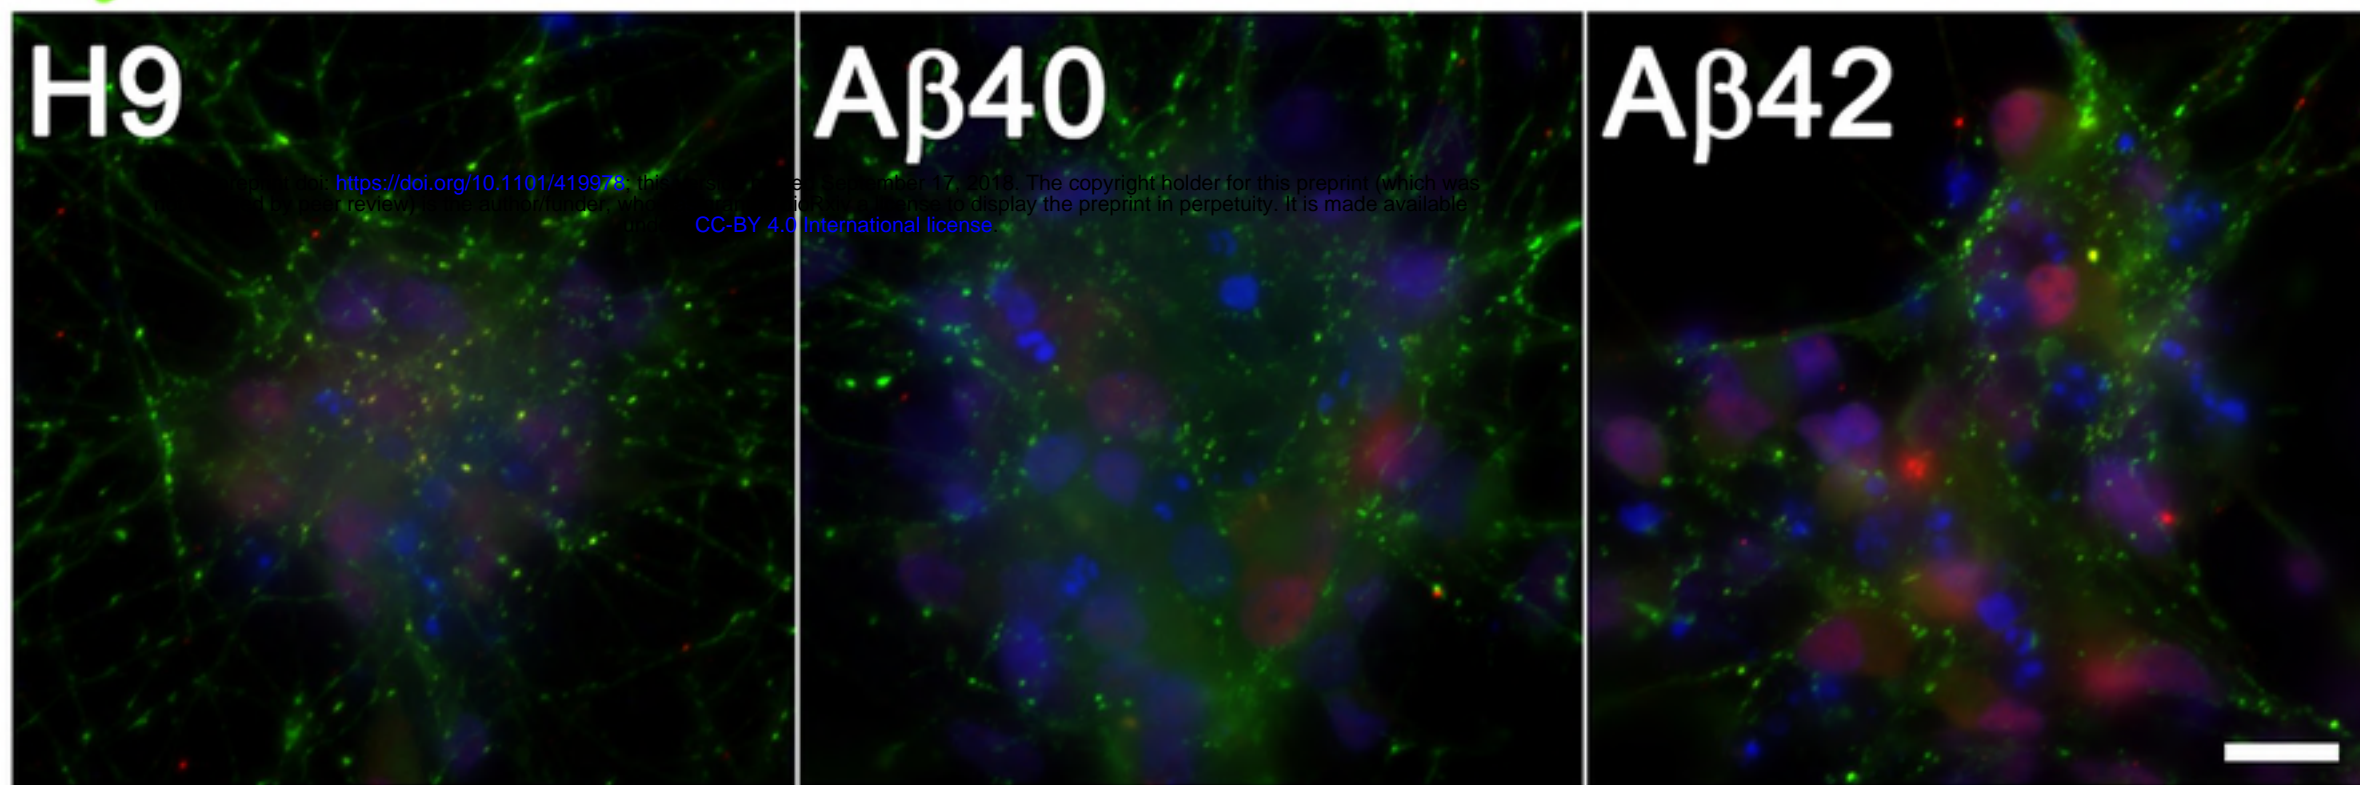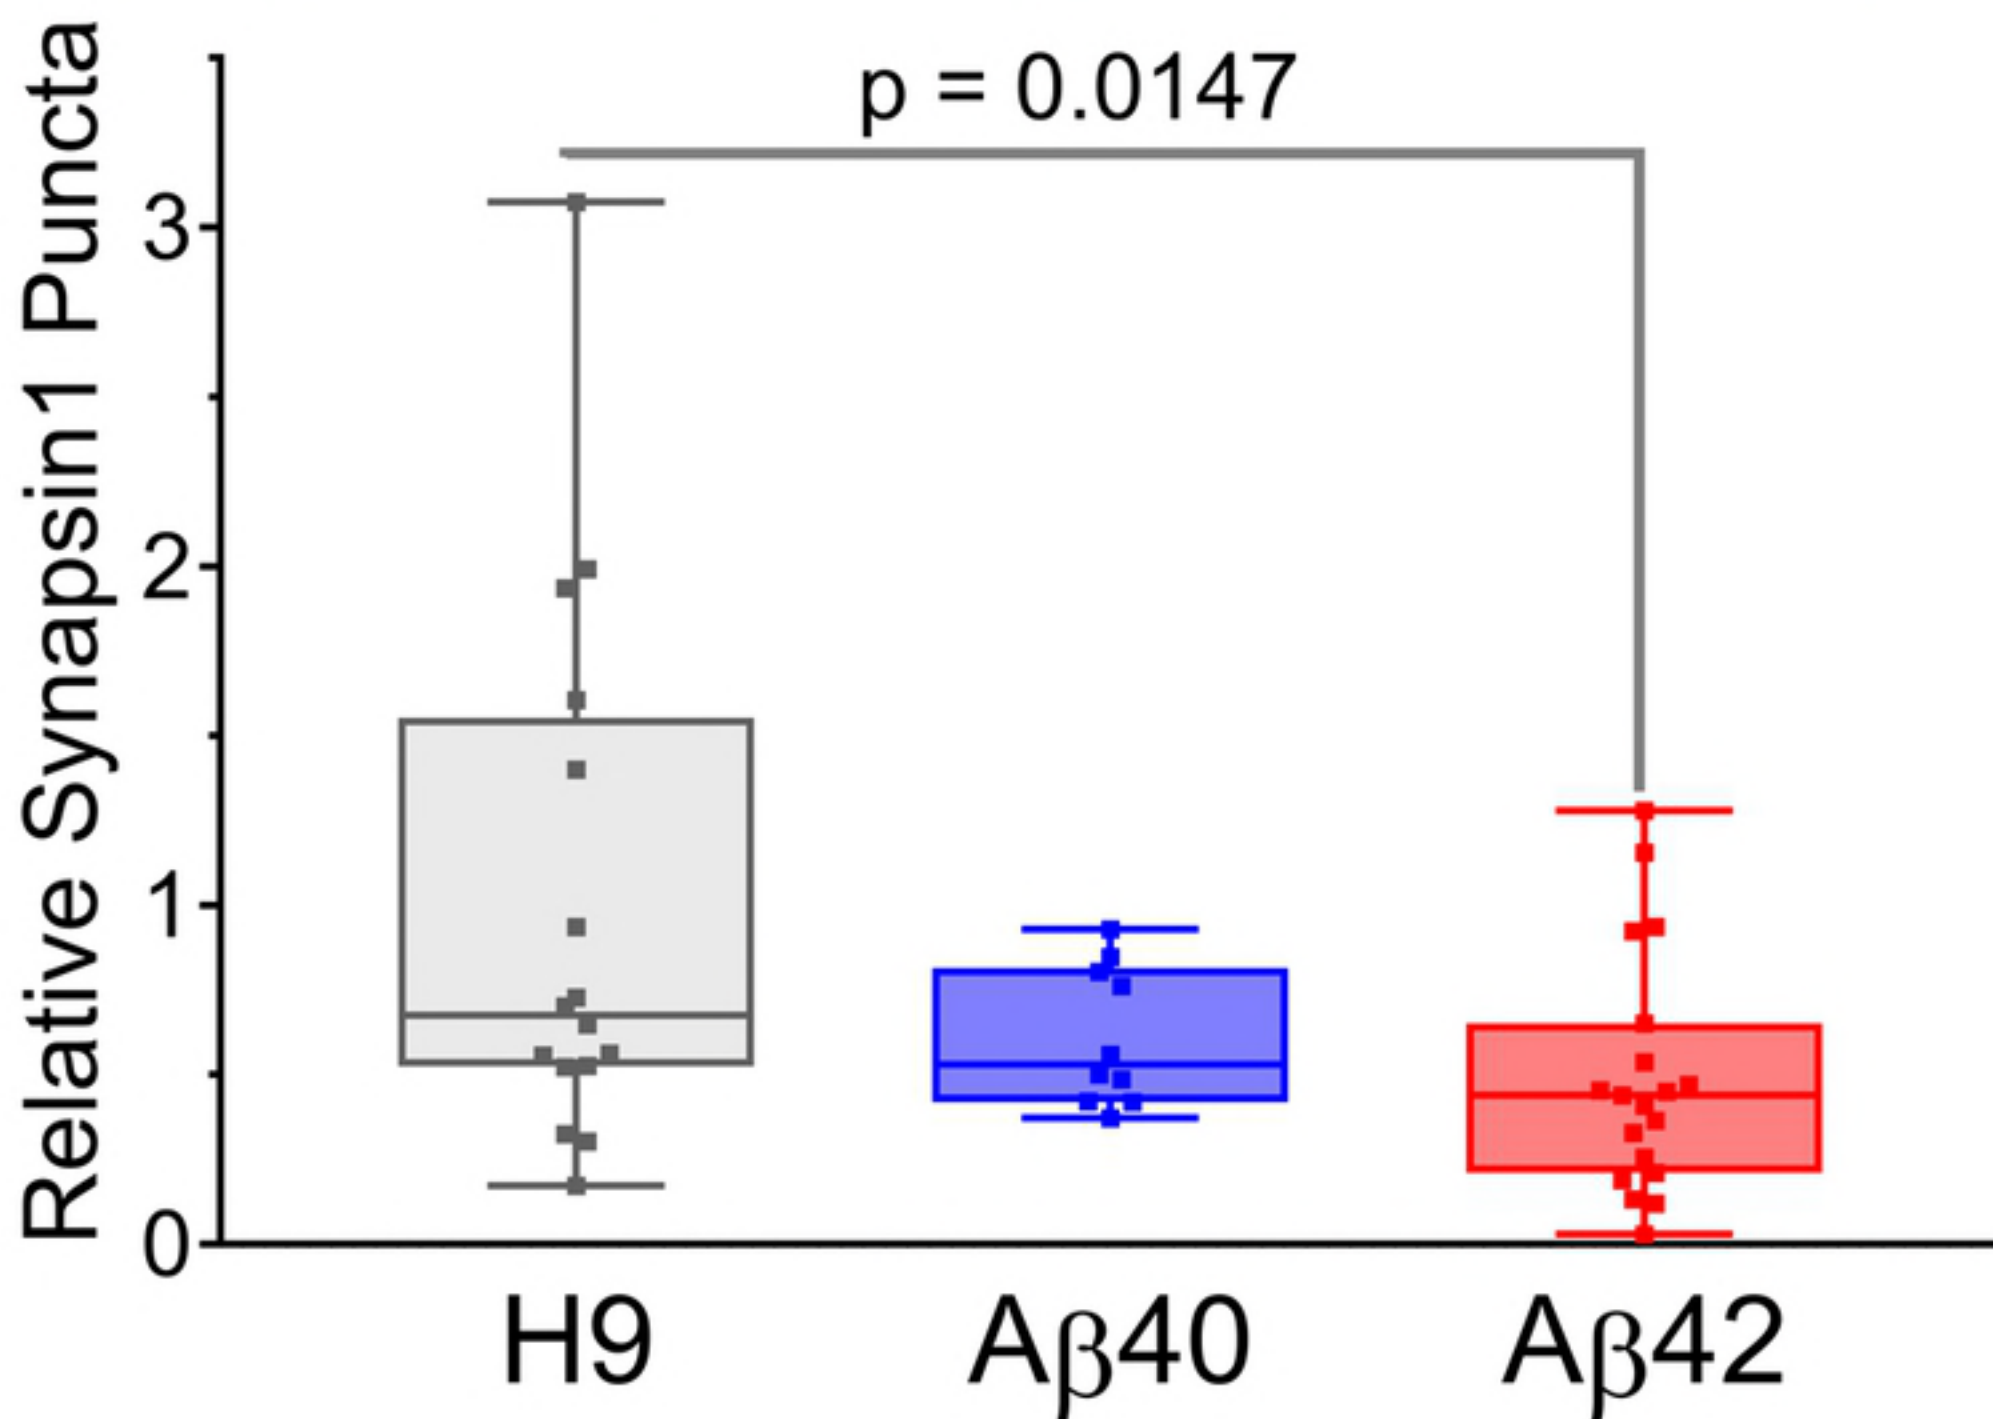

10 d

32-34 d

99 d

H9

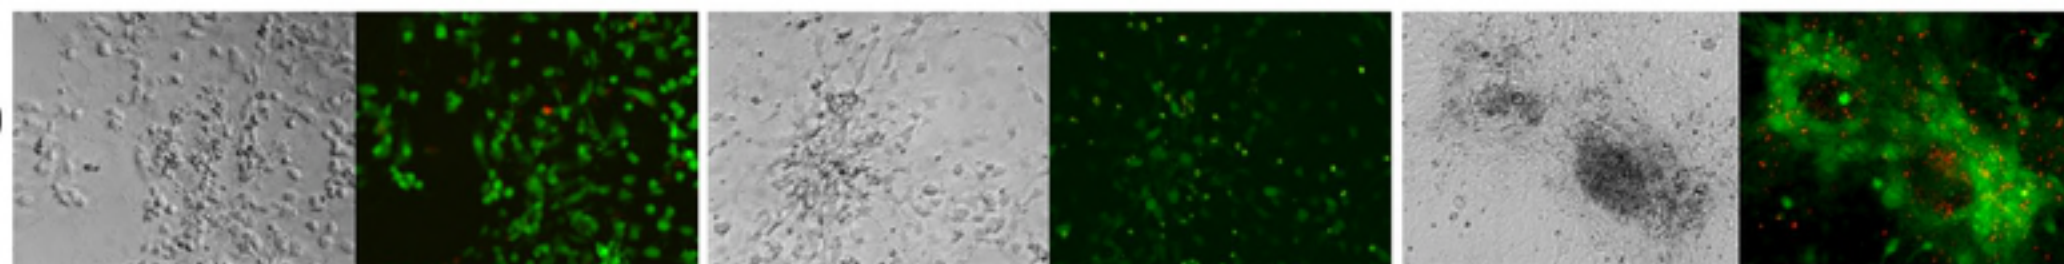A $\beta$ 40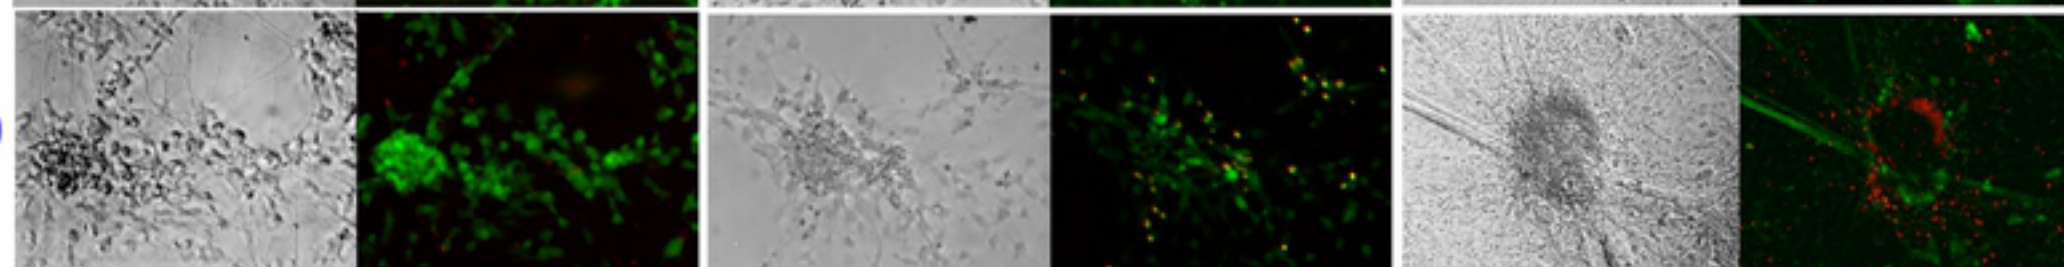A $\beta$ 42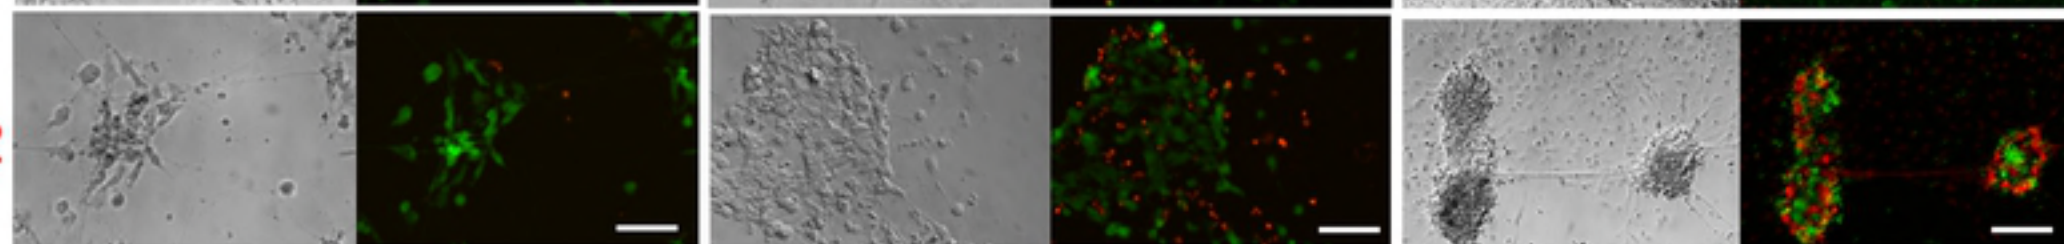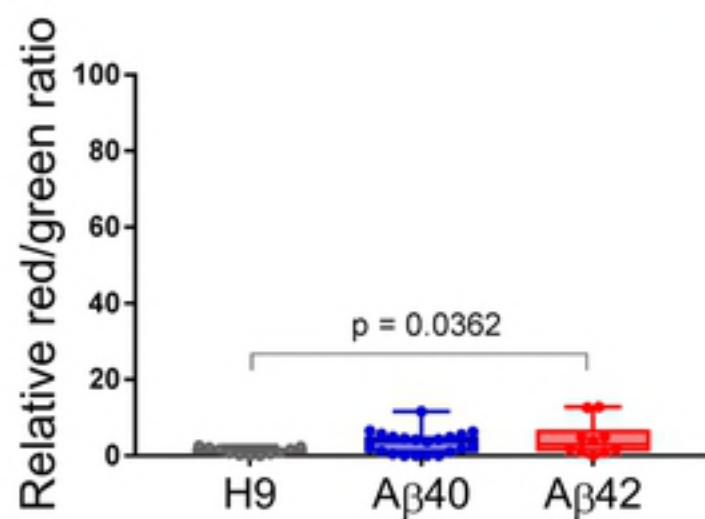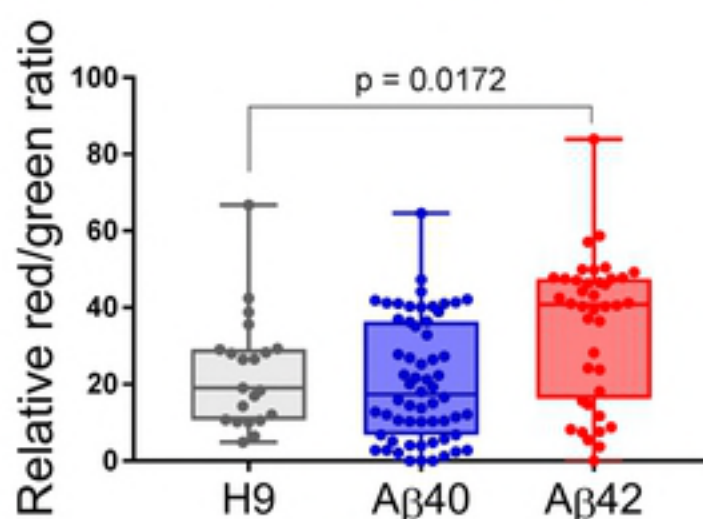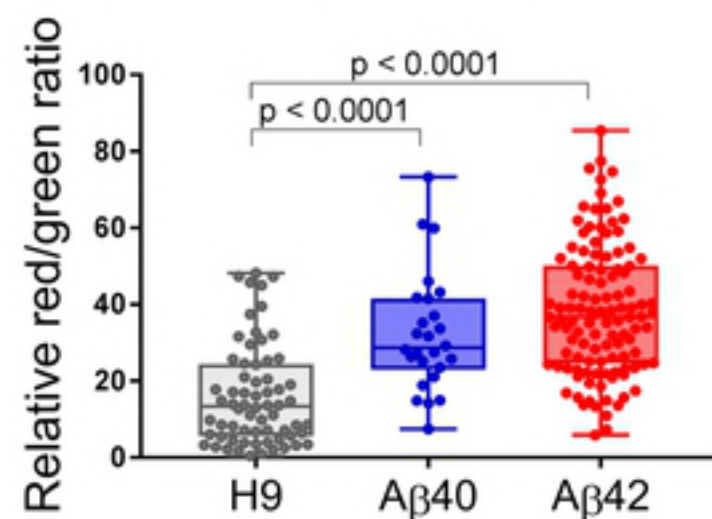

LAMP1 DAPI MERGE

38d H9

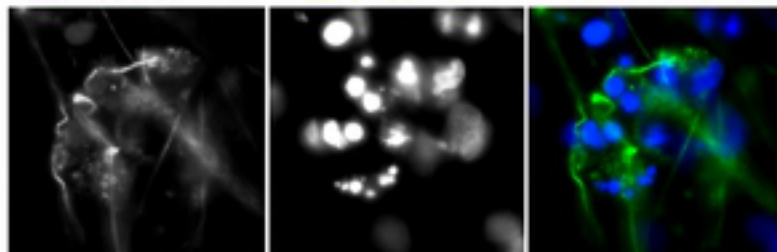

A $\beta$ 40

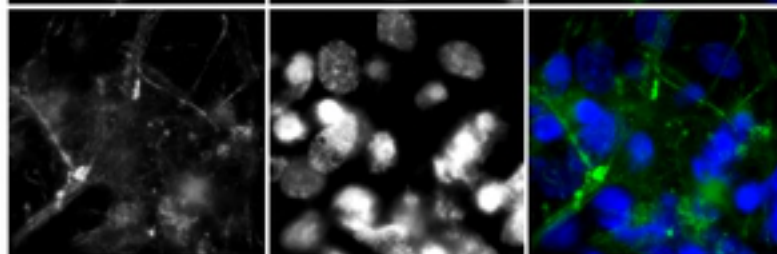

A $\beta$ 42

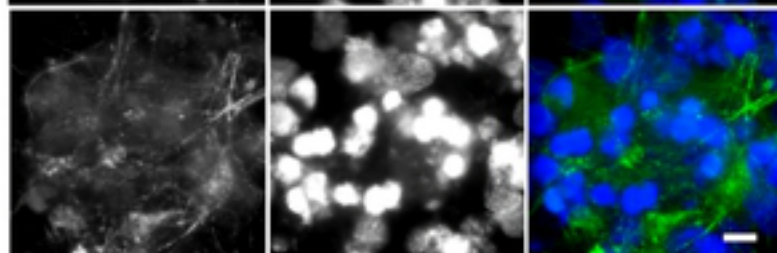

62d H9

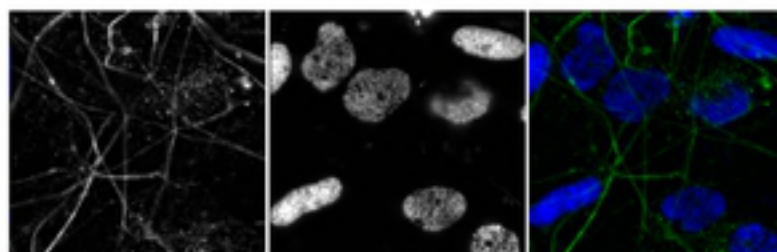

A $\beta$ 40

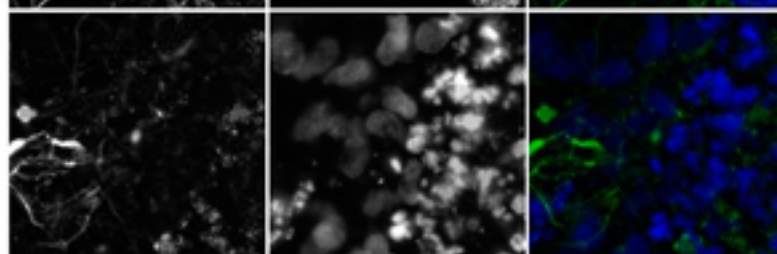

A $\beta$ 42

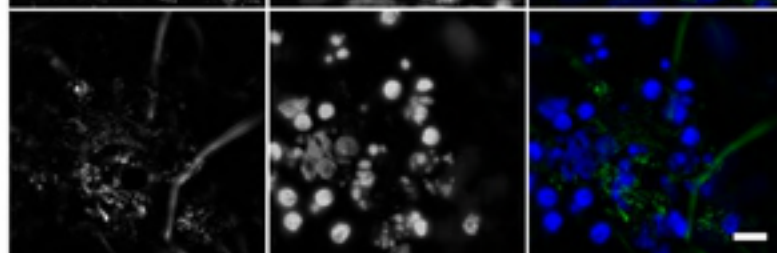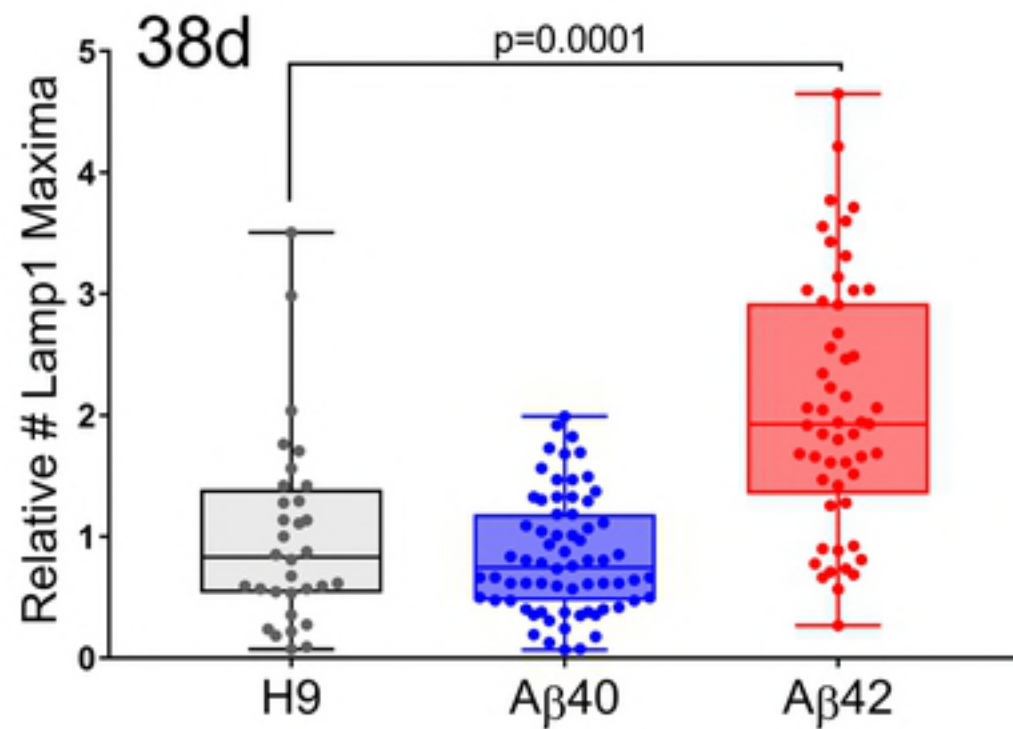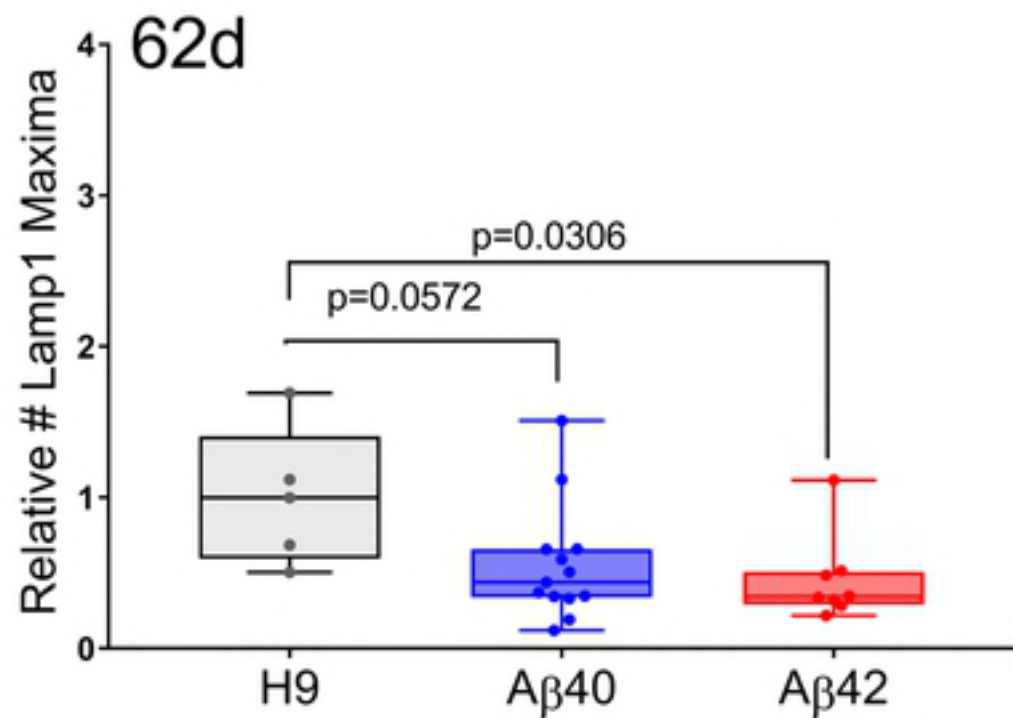

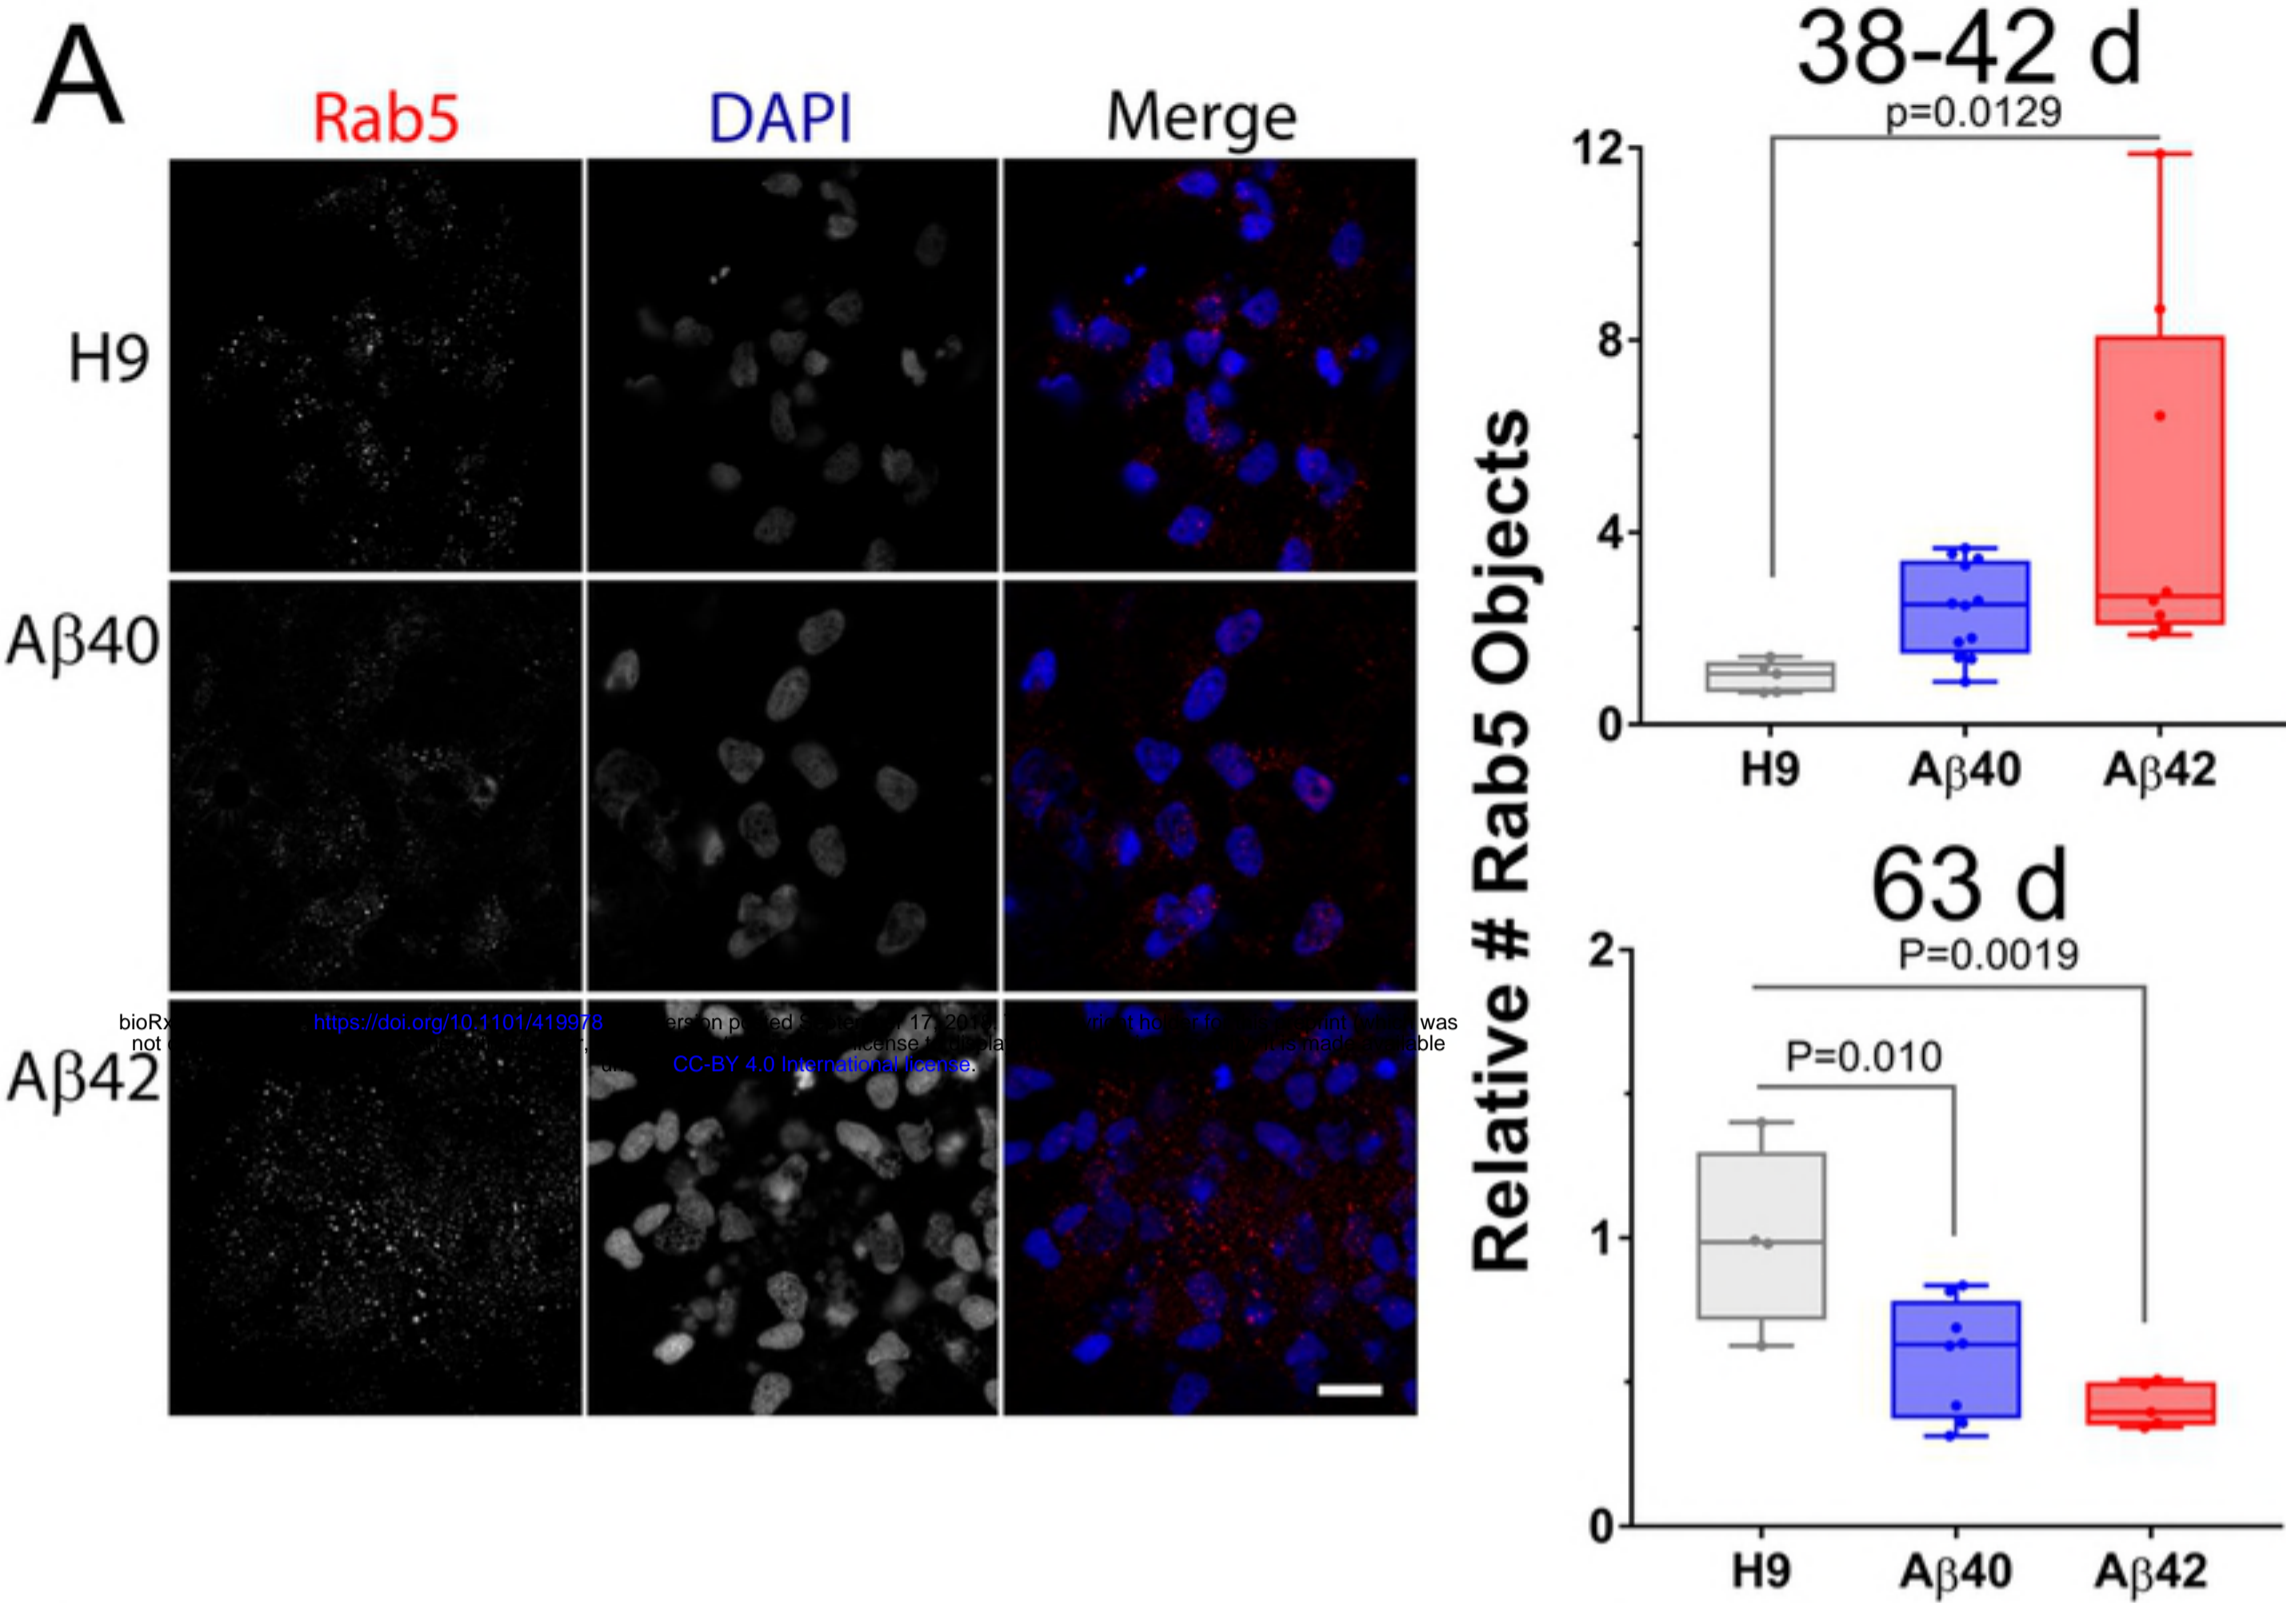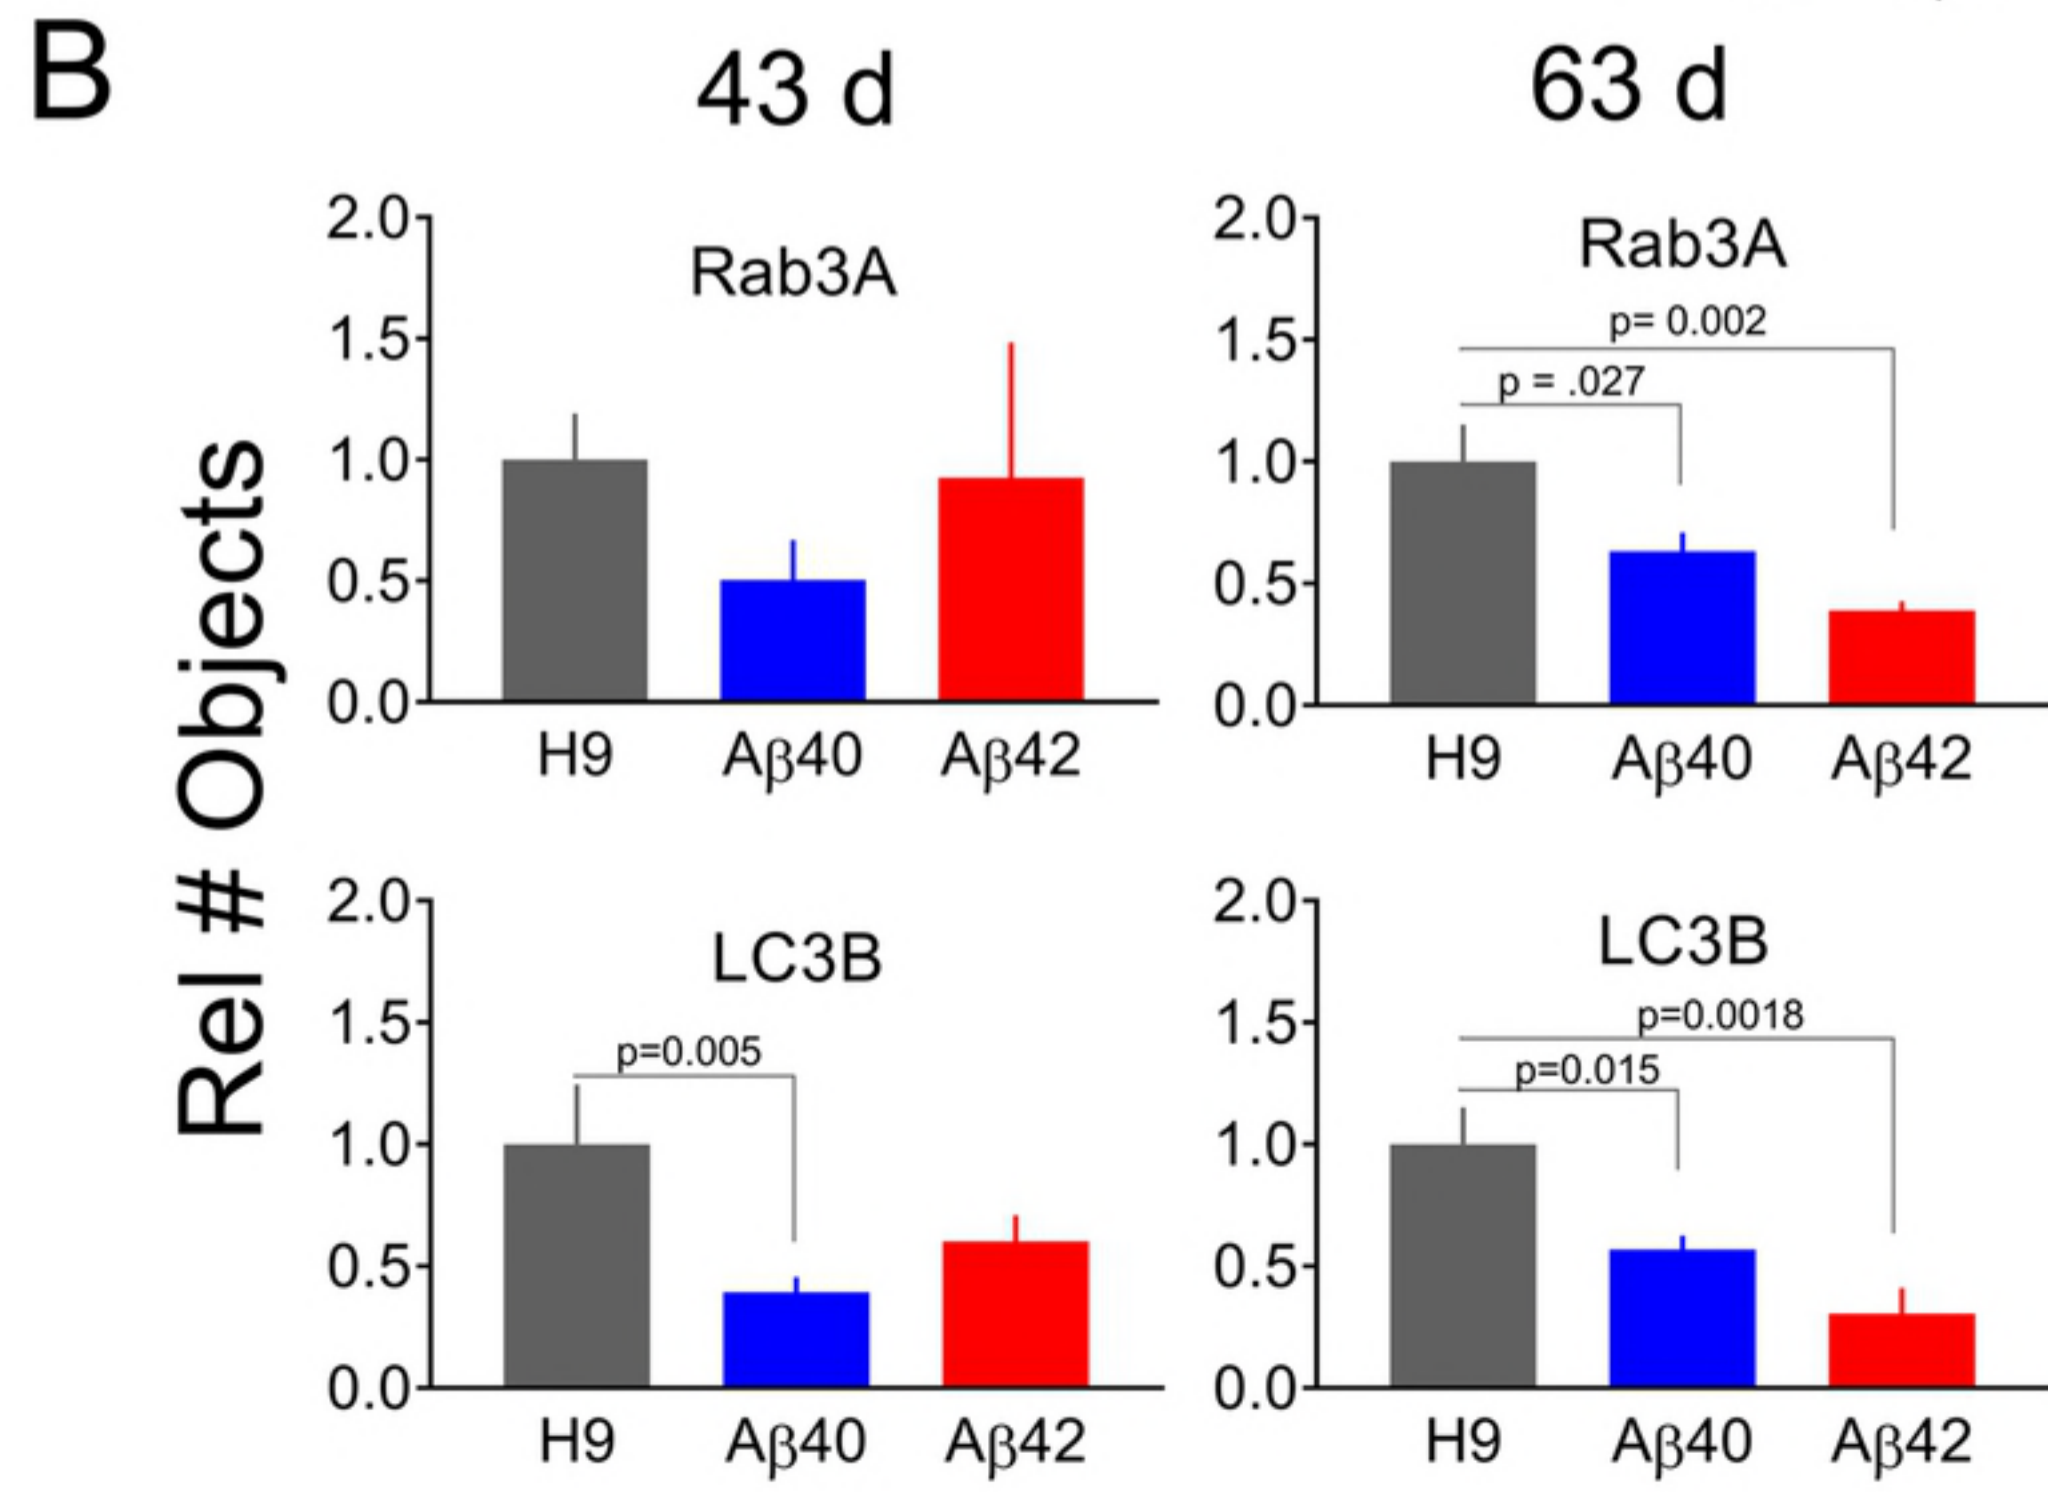

# pTauS244 DAPI

## A $\beta$ 42

bioRxiv preprint doi: <https://doi.org/10.1101/419978>; this version posted September 17, 2019. The copyright holder for this preprint (which was not certified by peer review) is the author/funder, who has granted bioRxiv a license to display the preprint in perpetuity. It is made available under aCC-BY 4.0 International license.

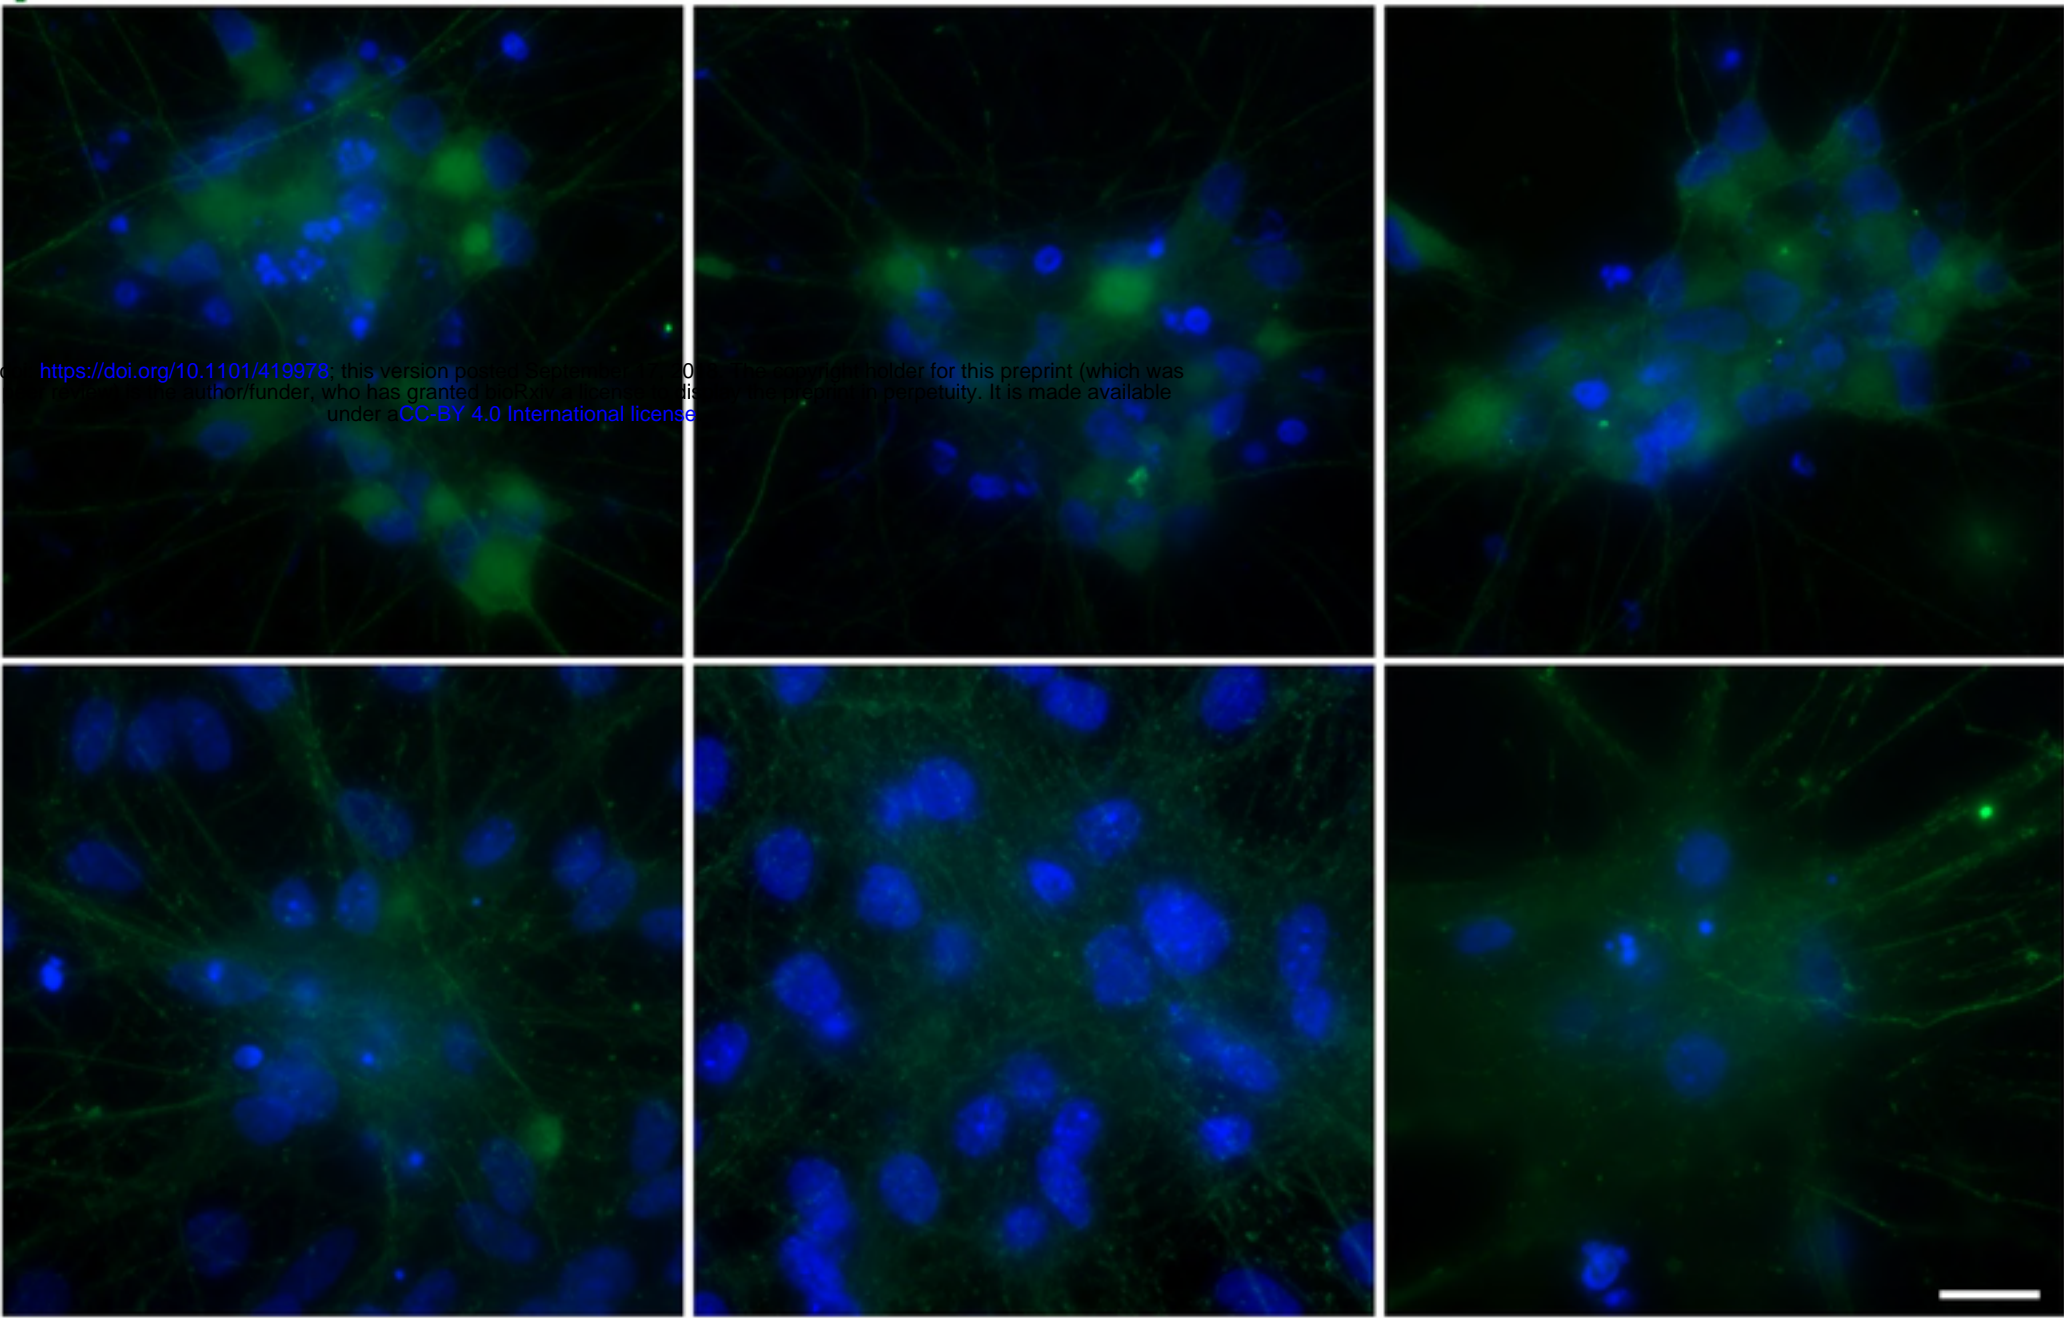

## H9

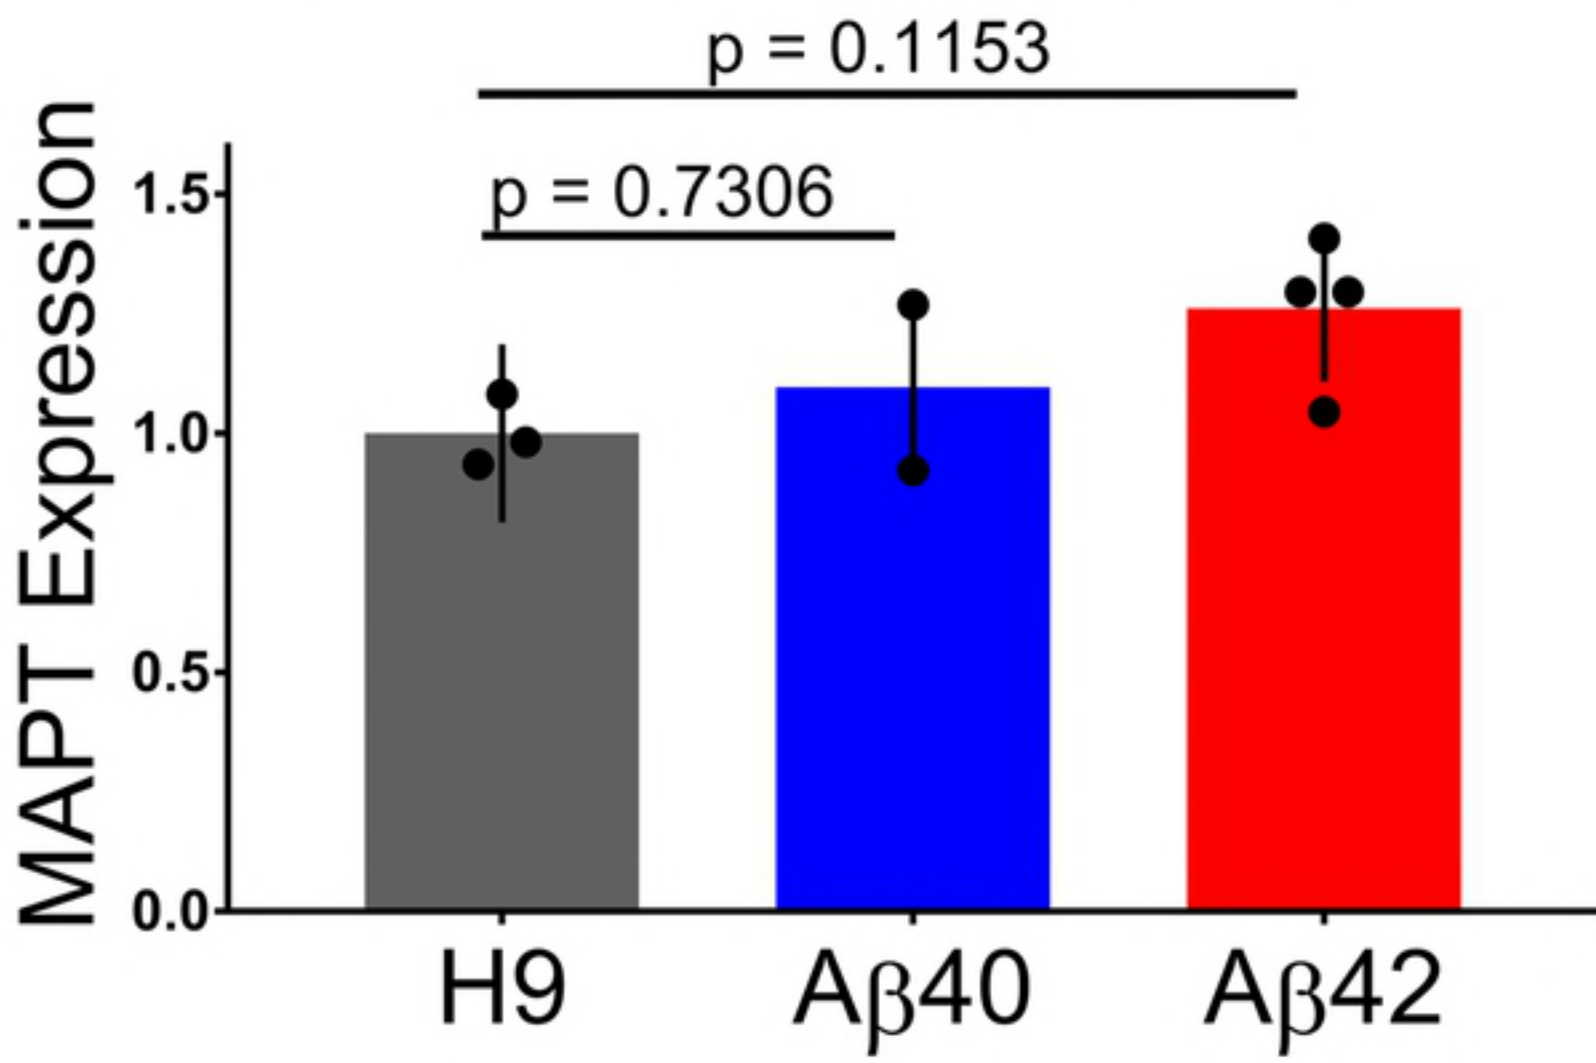

A

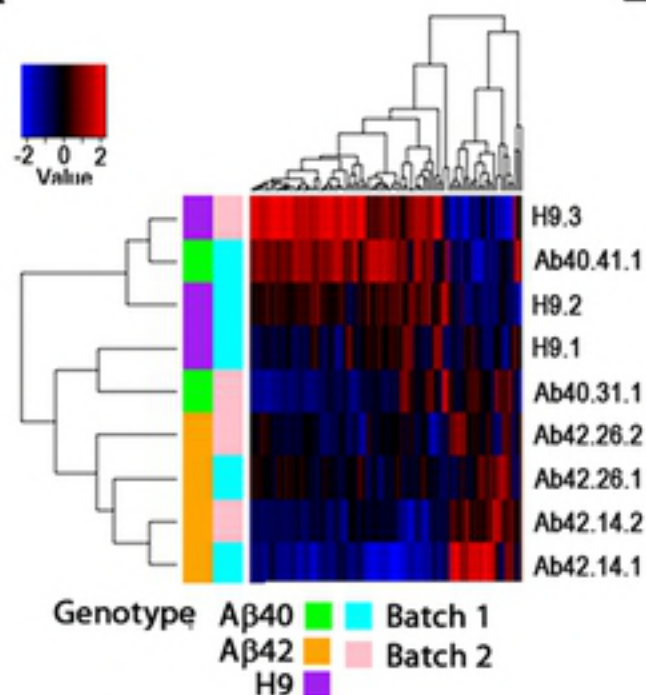

B

Aβ42 UP

|           | A2 vs H9 | 40 vs H9 |
|-----------|----------|----------|
| ZNF841    | 5.13     | -1.01    |
| DKK1      | 3.27     | 1.73     |
| GRP       | 2.95     | -1.43    |
| PPP1R17   | 2.75     | 1.74     |
| TMEM255A  | 2.51     | 1.64     |
| STAC2     | 2.50     | 1.26     |
| UTS2      | 2.50     | 1.51     |
| ADRA1B    | 2.46     | 1.51     |
| CXCL14    | 2.46     | 1.28     |
| TNFSF10   | 2.39     | 2.19     |
| SP8       | 2.36     | 1.05     |
| CPNE6     | 2.35     | 1.04     |
| HAPLN1    | 2.22     | 1.92     |
| HOXA11-AS | 2.22     | 1.80     |
| PRR32     | 2.08     | -1.65    |
| ABI3BP    | 2.01     | -1.12    |
| PART1     | 2.01     | -1.46    |
| FEZF1     | 1.84     | 1.42     |
| MME       | 1.83     | 1.01     |
| ALDH1A2   | 1.79     | -1.01    |
| CALHM2    | 1.74     | -1.06    |
| COL19A1   | 1.57     | -1.04    |
| NR2E1     | 1.54     | 1.30     |

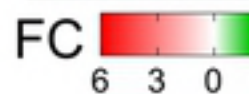

Aβ42 DN

|            | A2 vs H9 | 40 vs H9 |           | A2 vs H9 | 40 vs H9 |
|------------|----------|----------|-----------|----------|----------|
| SERPINA3   | -1.59    | 1.97     | NEK5      | -2.41    | -1.01    |
| CXorf57    | -1.61    | 3.48     | RARRES3   | -2.41    | 1.03     |
| DNAI2      | -1.65    | 1.03     | CD109     | -2.45    | -1.54    |
| ANKUB1     | -1.68    | -1.05    | TMC5      | -2.45    | -1.26    |
| EGFLAM     | -1.68    | -1.16    | MAP3K19   | -2.53    | -1.36    |
| DLX4       | -1.69    | -1.41    | TEKT1     | -2.53    | -1.84    |
| C11orf88   | -1.78    | -1.43    | KIAA2012  | -2.55    | -2.11    |
| KCNMB1     | -1.79    | 1.11     | DNAAF1    | -2.57    | -1.39    |
| USH2A      | -1.83    | -1.17    | A4GALT    | -2.58    | -1.09    |
| PARD6G-AS1 | -1.89    | 1.34     | LRRC71    | -2.66    | -1.27    |
| DNAH11     | -1.92    | -1.16    | CCDC114   | -2.68    | -1.73    |
| COL11A1    | -1.93    | -1.42    | CFAP47    | -2.69    | -1.08    |
| PCDHA3     | -1.93    | -1.25    | PCP4      | -2.69    | -1.36    |
| FNDC1      | -1.95    | -1.33    | CFAP161   | -2.71    | -1.62    |
| GAS2L2     | -1.95    | -1.56    | SCN1A     | -2.75    | -1.43    |
| NHLRC4     | -1.95    | -1.39    | CFAP70    | -2.89    | -1.84    |
| ZNF280D    | -1.95    | -1.36    | GALNT3    | -2.89    | -2.08    |
| COL8A1     | -1.99    | 1.92     | TCTEX1D1  | -2.89    | -2.27    |
| FMOD       | -2.00    | -1.65    | STOML3    | -2.95    | -1.46    |
| APOL1      | -2.01    | 1.83     | NTRK1     | -3.03    | 1.22     |
| ANKRD66    | -2.03    | -2.03    | SLC12A1   | -3.05    | -2.00    |
| SHISA2     | -2.14    | -1.08    | INSRR     | -3.07    | 1.01     |
| CFAP100    | -2.16    | 1.09     | GDA       | -3.10    | -1.99    |
| SPAG17     | -2.20    | -1.54    | ZNF585B   | -3.10    | 1.67     |
| ZNF506     | -2.20    | 6.96     | HP        | -3.16    | 1.64     |
| C2orf50    | -2.22    | -1.87    | SERPIND1  | -3.20    | -2.22    |
| AKAP14     | -2.23    | -1.14    | CCDC162P  | -3.27    | -1.72    |
| RNF212     | -2.25    | -1.53    | FAM216B   | -3.27    | -1.87    |
| PARVG      | -2.27    | -2.11    | ZNF542P   | -3.27    | 1.92     |
| LINC00880  | -2.30    | -1.06    | VWA3A     | -3.32    | -1.82    |
| CFAP45     | -2.33    | -1.66    | C10orf105 | -3.53    | -2.79    |
| TYMP       | -2.35    | -1.12    | STXBP6    | -3.53    | -2.66    |
| CFAP126    | -2.38    | -1.82    | DAW1      | -3.61    | -1.69    |
| C5orf66    | -2.41    | -1.61    | CLIC5     | -3.66    | 1.03     |
| ERP27      | -2.41    | -1.05    | ZNF135    | -7.06    | 1.43     |

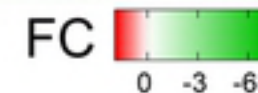

C

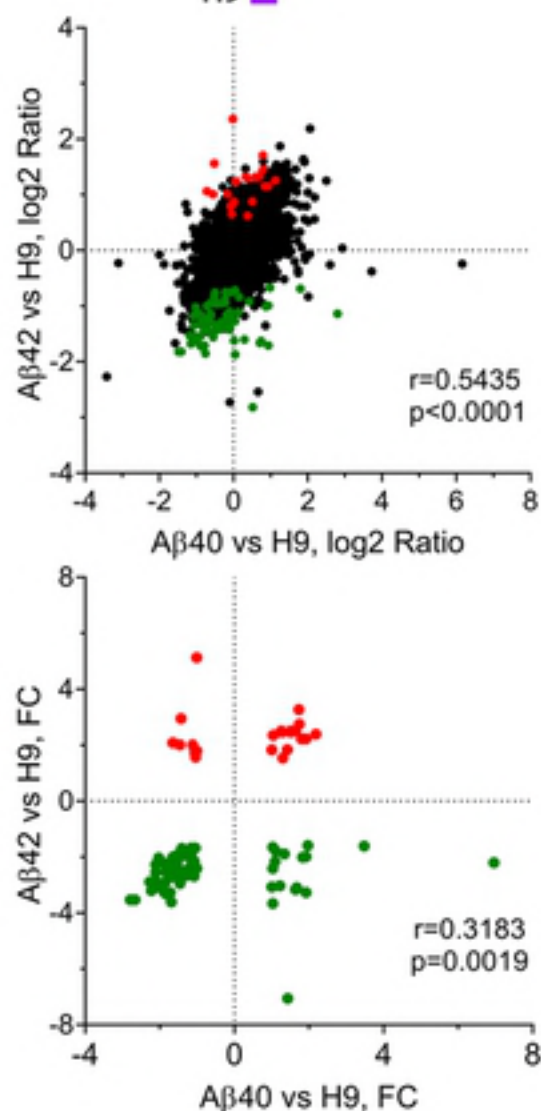

Source: https://www.biorxiv.org/content/10.1101/419978v1.full.pdf
